# Supplementary material for: Synthesis and Characterization of 1,10-Phenanthroline-mono-N-oxides
Source: MDPI journal article supplement (doi:10.3390/molecules26123632), 2021-06-14
Supplement: s1 [file s1]

Supplementary Material for

**Synthesis and characterization of 1,10-phenanthroline-mono-*N*-oxides**

Ferenc Najóczki<sup>1, 4</sup>, Mária Szabó<sup>1</sup>, Norbert Lihi<sup>1, 2</sup>, Antal Udvardy<sup>3</sup> and István Fábián<sup>1, 2\*</sup>

<sup>1</sup> Department of Inorganic and Analytical Chemistry, University of Debrecen, H-4032 Debrecen, Egyetem tér 1, Hungary

<sup>2</sup> MTA-DE Homogeneous Catalysis and Reaction Mechanisms Research Group, University of Debrecen, H-4032 Debrecen, Egyetem tér 1, Hungary

<sup>3</sup> Department of Physical Chemistry, University of Debrecen, H-4032 Debrecen, Egyetem tér 1, Hungary

<sup>4</sup> Doctoral School of Chemistry, University of Debrecen, H-4032 Debrecen, Egyetem tér 1., Hungary

Corresponding author: István Fábián, e-mail: ifabian@science.unideb.hu, Tel: + 36 52

512-900/22378, Fax: + 36 52 518-660

## Table of Contents

|                                                                                        |    |
|----------------------------------------------------------------------------------------|----|
| General Information.....                                                               | 3  |
| Figure S1. ....                                                                        | 3  |
| Copies of NMR and mass spectra .....                                                   | 4  |
| The acid dissociation constants of substituted mono- <i>N</i> -oxide derivatives ..... | 41 |
| X-ray structures of 1,10-phenantroline-1- <i>N</i> -oxide derivatives .....            | 42 |
| DFT and TD-DFT calculations.....                                                       | 56 |

## General Information

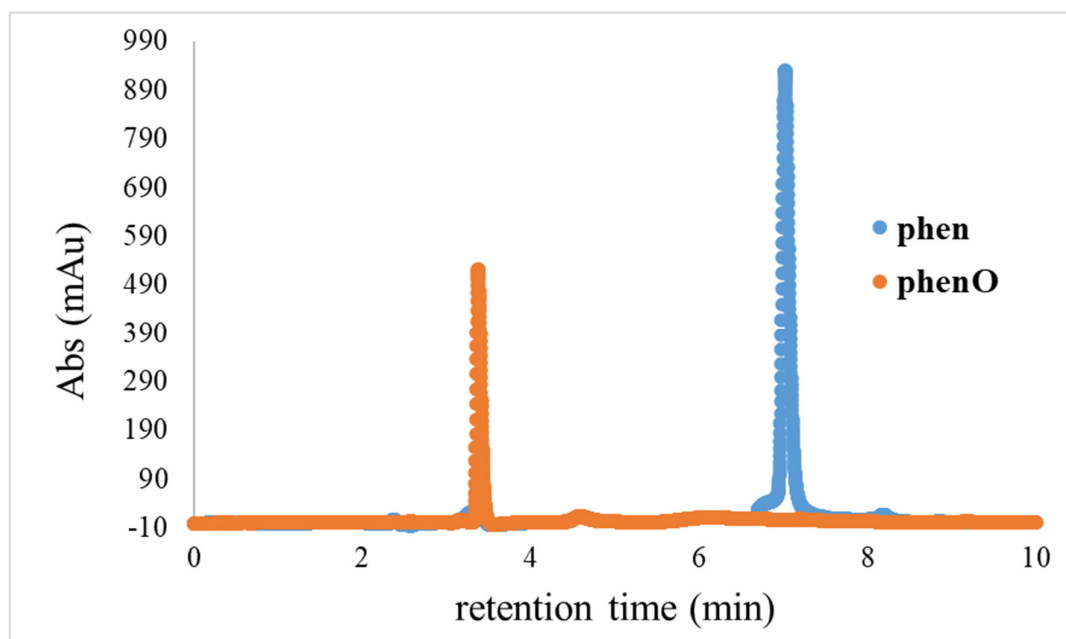

**Figure S1.** HPLC chromatogram recorded in the phen/PMS system after the extraction with  $\text{CHCl}_3$  (orange). Blue: chromatogram of 1,10-phenanthroline. The elution was achieved on Phenomenex Luna 5u C18(2) 100A 250 x 4.60 mm 5 microns column. The chromatograms were detected at 230 nm.

## Copies of NMR and mass spectra

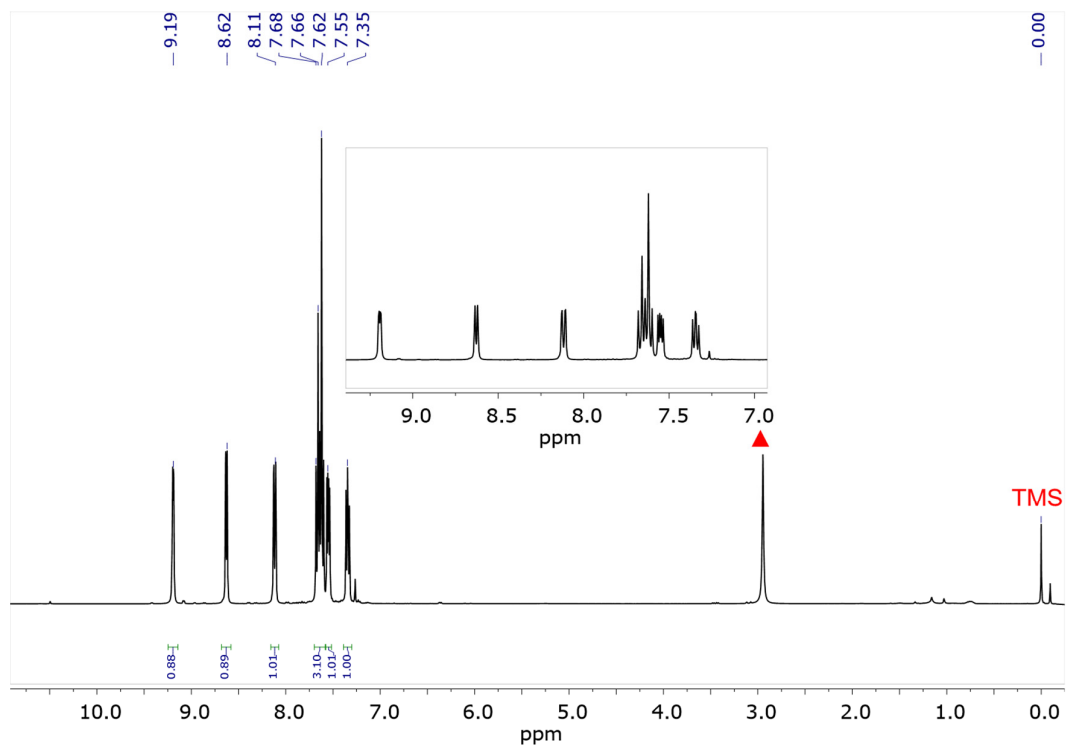

**Figure S2.**  $^1\text{H}$  NMR spectrum of phenO in  $\text{CDCl}_3$  (400 MHz, 25 °C). ▲ indicates solvent impurity. Inset: Selected region of the aromatic part.



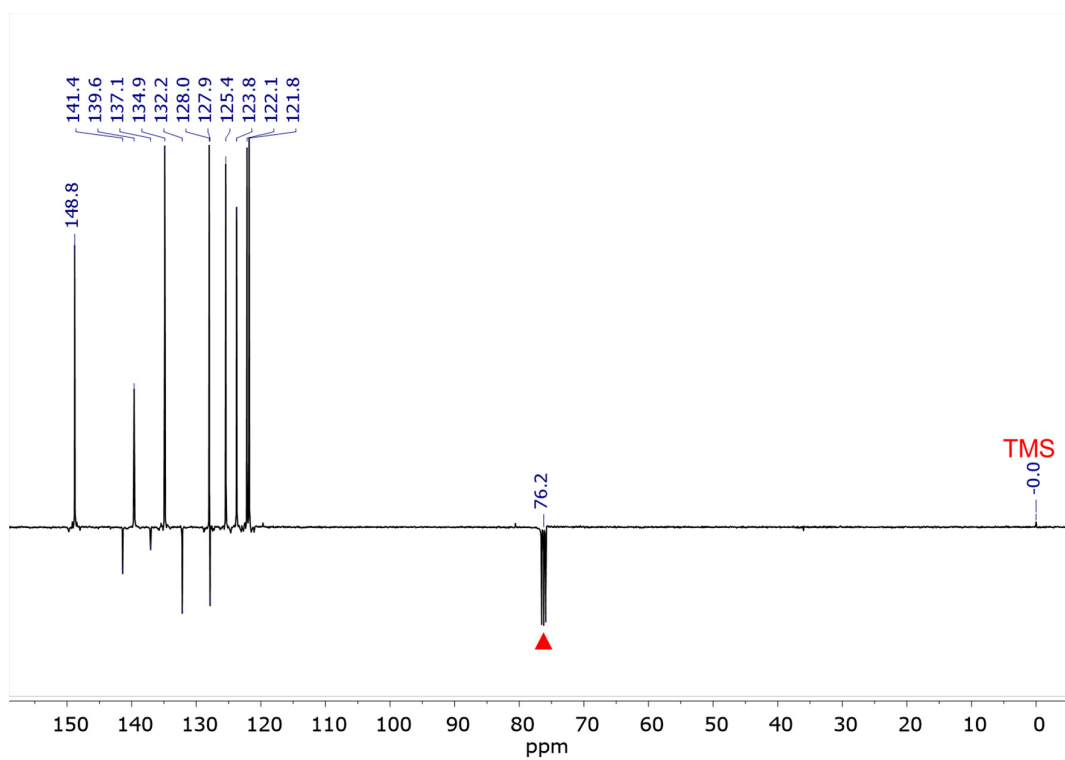

**Figure S3.** APT  $^{13}\text{C}$  NMR spectrum of phenO in  $\text{CDCl}_3$  (100.6 MHz, 25 °C).  $\blacktriangle$  indicates the solvent residual peak.

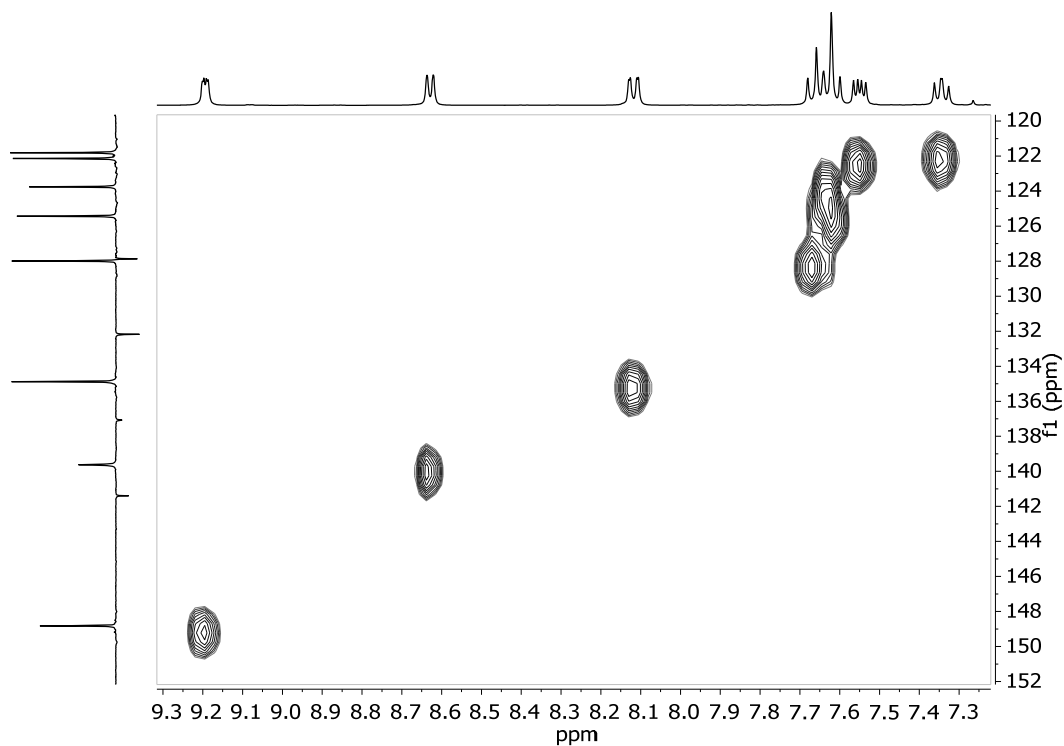

**Figure S4.** ( $^1\text{H}$ - $^{13}\text{C}$ ) HSQC NMR spectrum of phenO in  $\text{CDCl}_3$  (400 MHz, 25 °C).

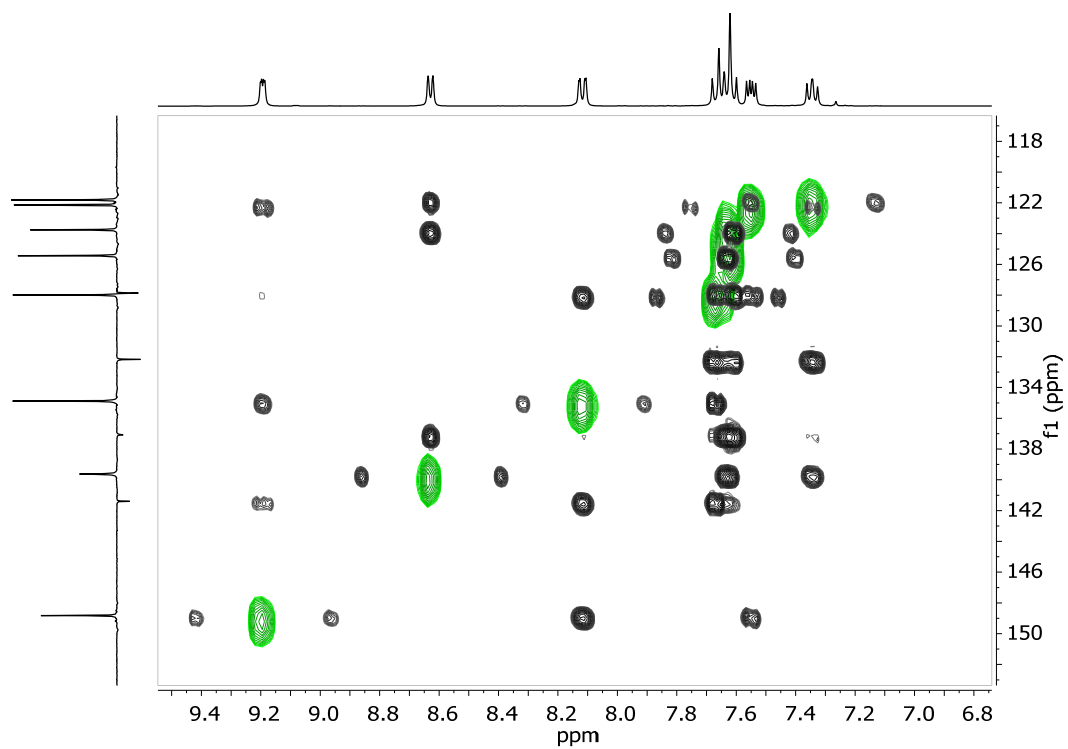

**Figure S5.** Superposition of the ( $^1\text{H}$ - $^{13}\text{C}$ ) HSQC (green) and ( $^1\text{H}$ - $^{13}\text{C}$ ) HMBC (black) NMR spectra of phenO in  $\text{CDCl}_3$  (400 MHz, 25  $^\circ\text{C}$ ).

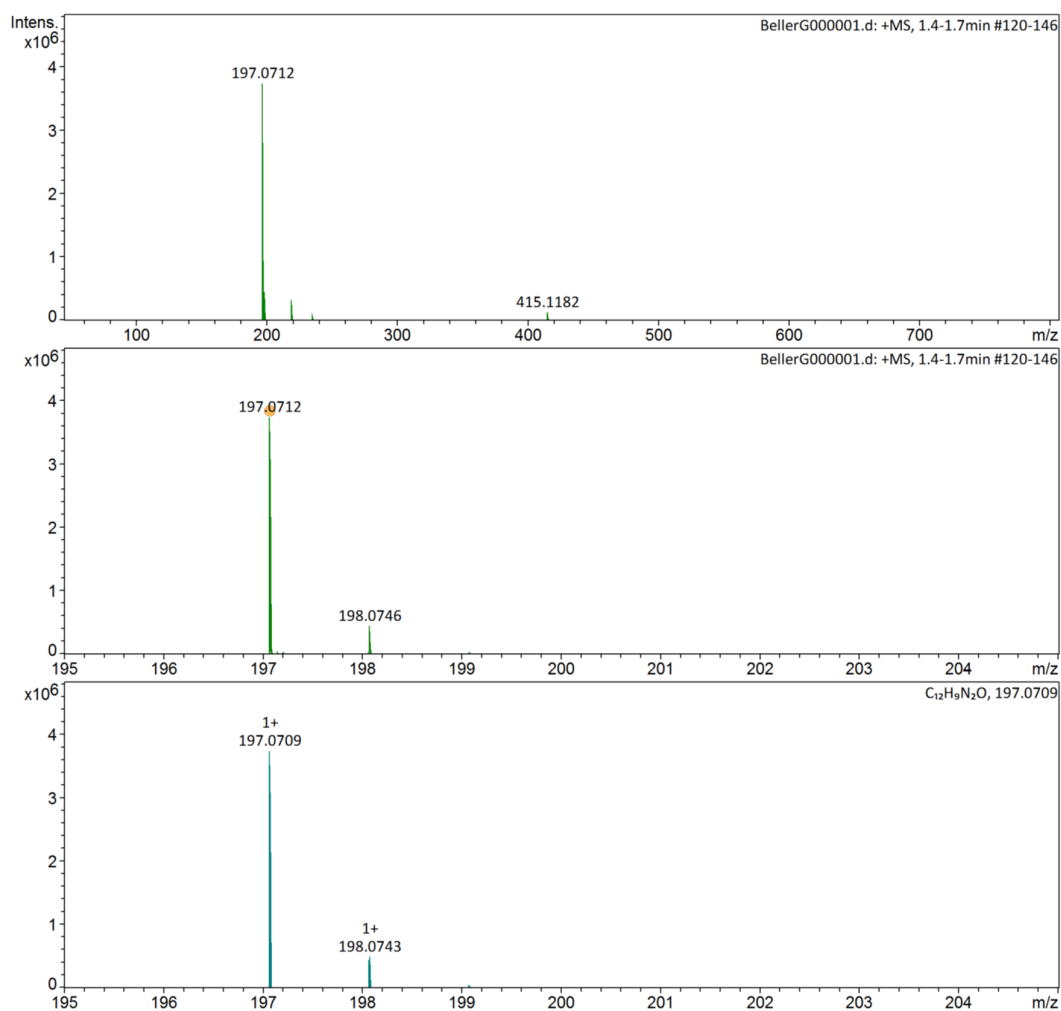

**Figure S6.** HRMS spectrum of phenO in positive mode.

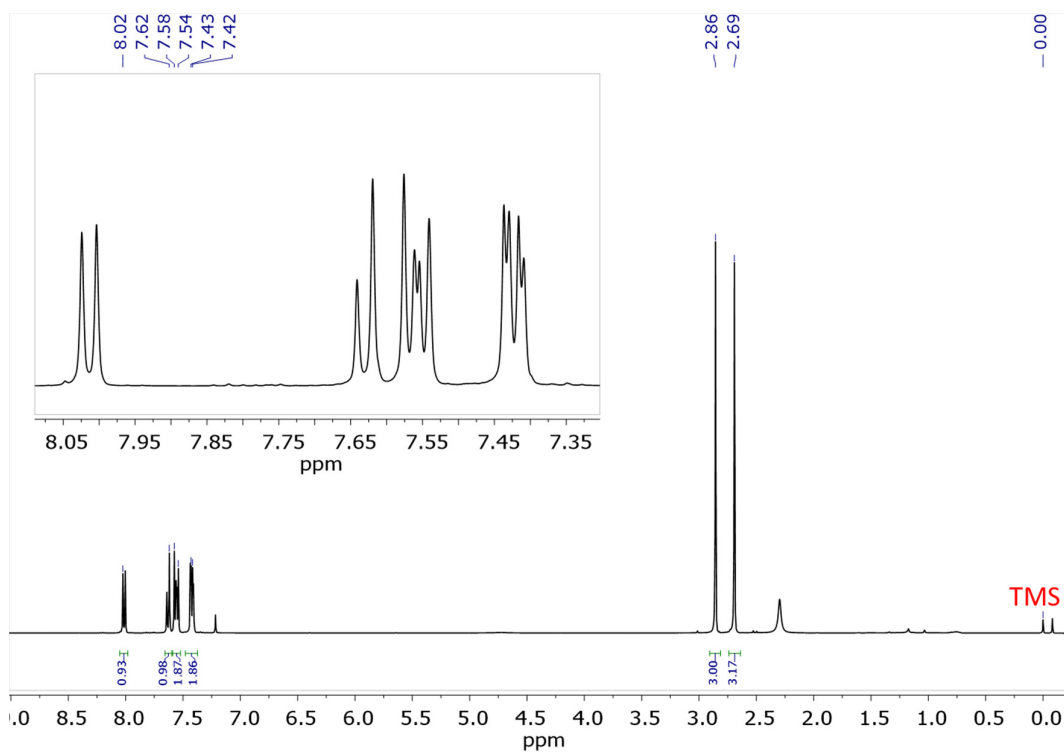

**Figure S7.** <sup>1</sup>H NMR spectrum of DMPO in CDCl<sub>3</sub> (400 MHz, 25 °C). Inset: Selected region of the aromatic part.

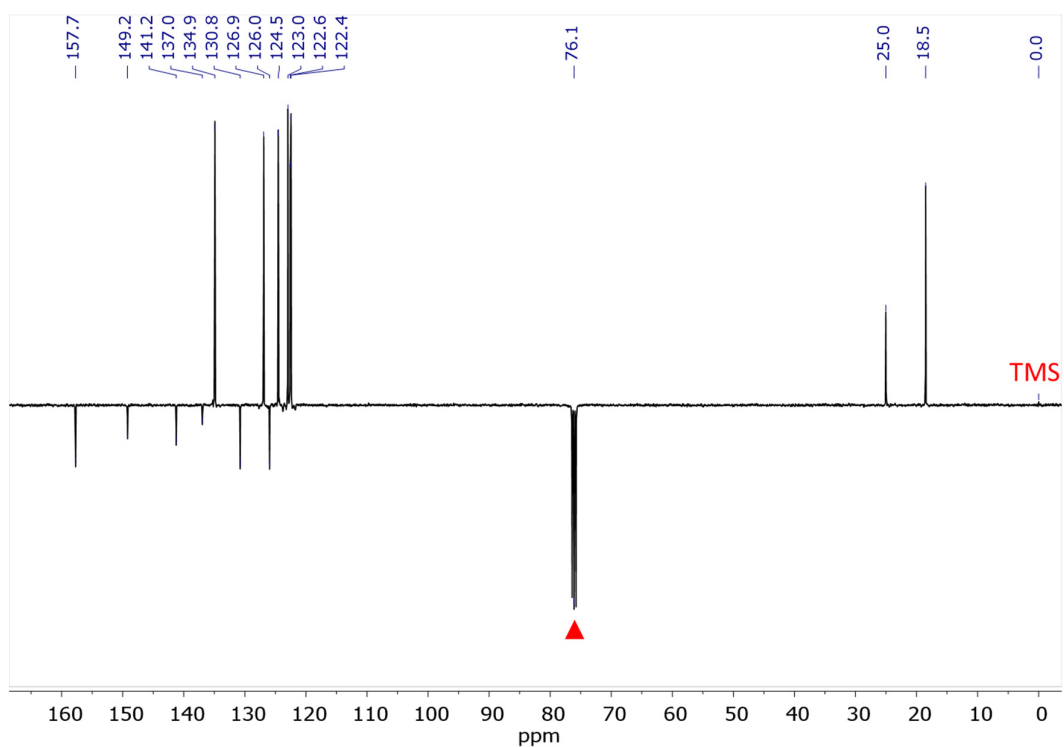

**Figure S8.** APT <sup>13</sup>C NMR spectrum of DMPO in CDCl<sub>3</sub> (100.6 MHz, 25 °C). ▲ indicates the solvent residual peak.

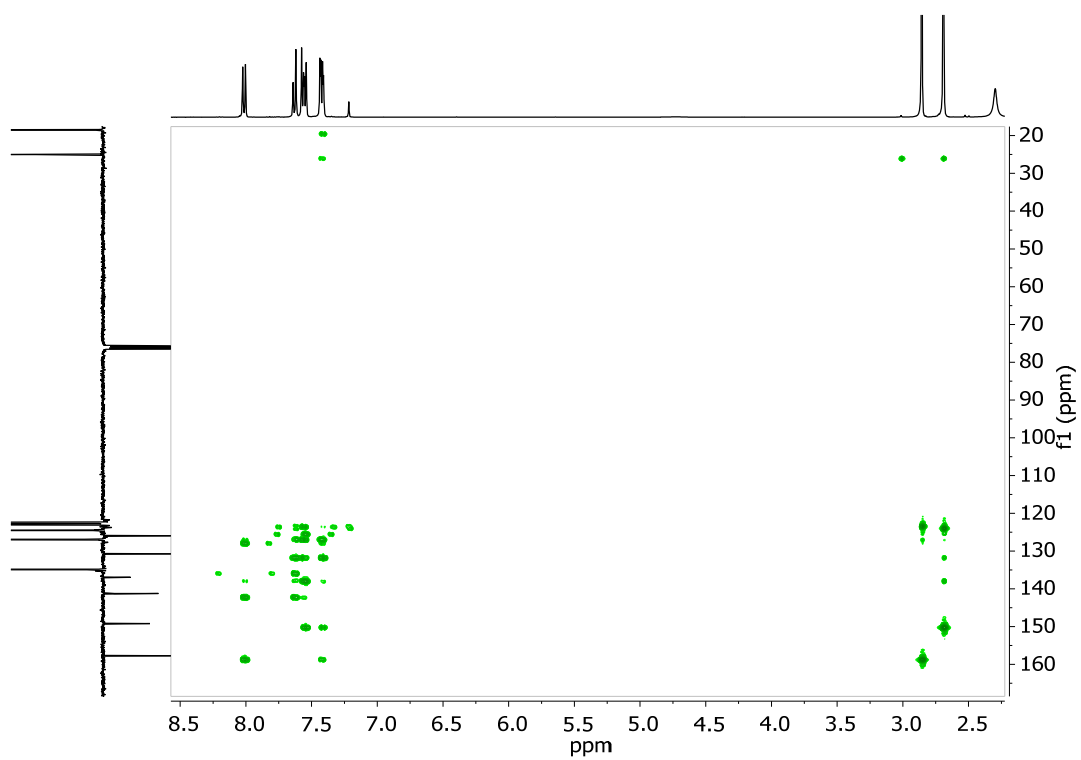

**Figure S9.** ( $^1\text{H}$ - $^{13}\text{C}$ ) HMBC NMR spectrum of DMPO in  $\text{CDCl}_3$  (400 MHz, 25  $^\circ\text{C}$ ).

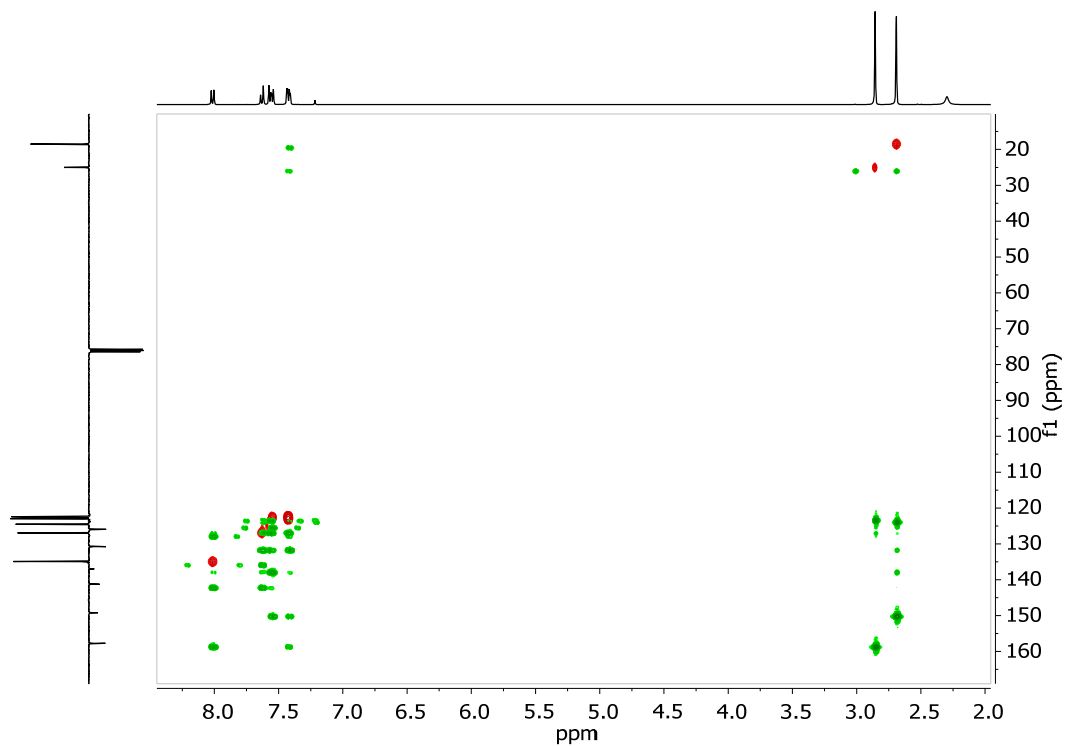

**Figure S10.** Superposition of the ( $^1\text{H}$ - $^{13}\text{C}$ ) HSQC (red) and ( $^1\text{H}$ - $^{13}\text{C}$ ) HMBC (green) NMR spectra of DMPO in  $\text{CDCl}_3$  (400 MHz, 25  $^\circ\text{C}$ ).



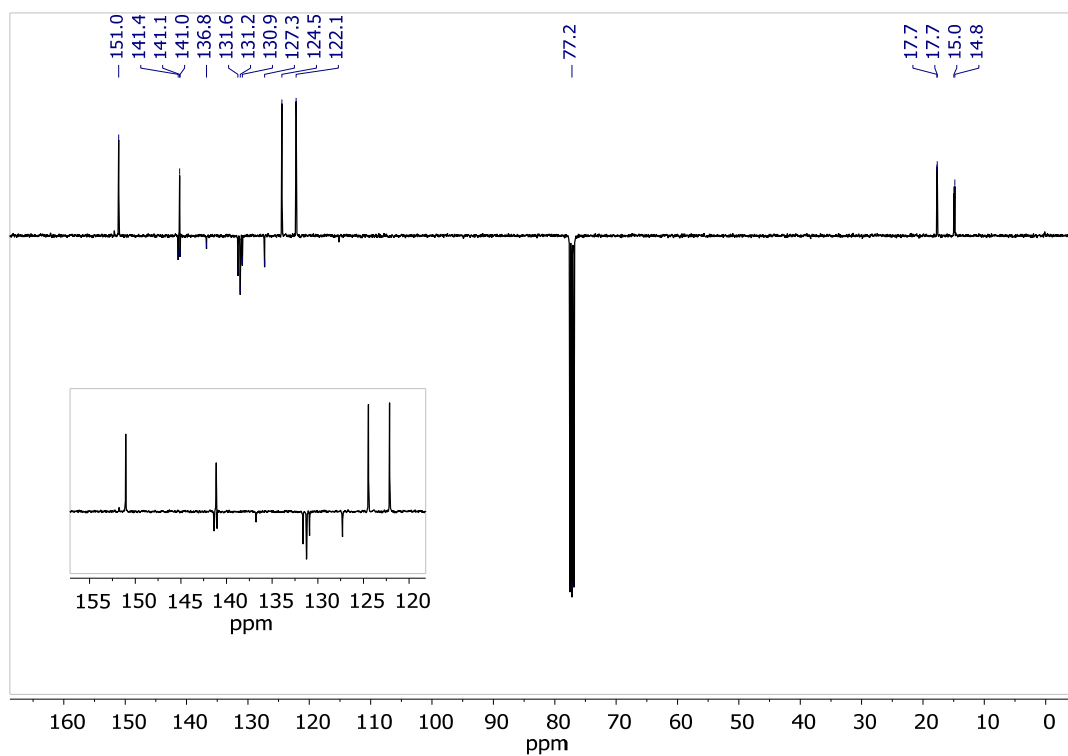

**Figure S13.** APT  $^{13}\text{C}$  NMR spectrum of TMPO in  $\text{CDCl}_3$  (100.6 MHz, 25  $^\circ\text{C}$ ).  $\blacktriangle$  indicates the solvent residual peak. Inset: Selected region of the aromatic part.

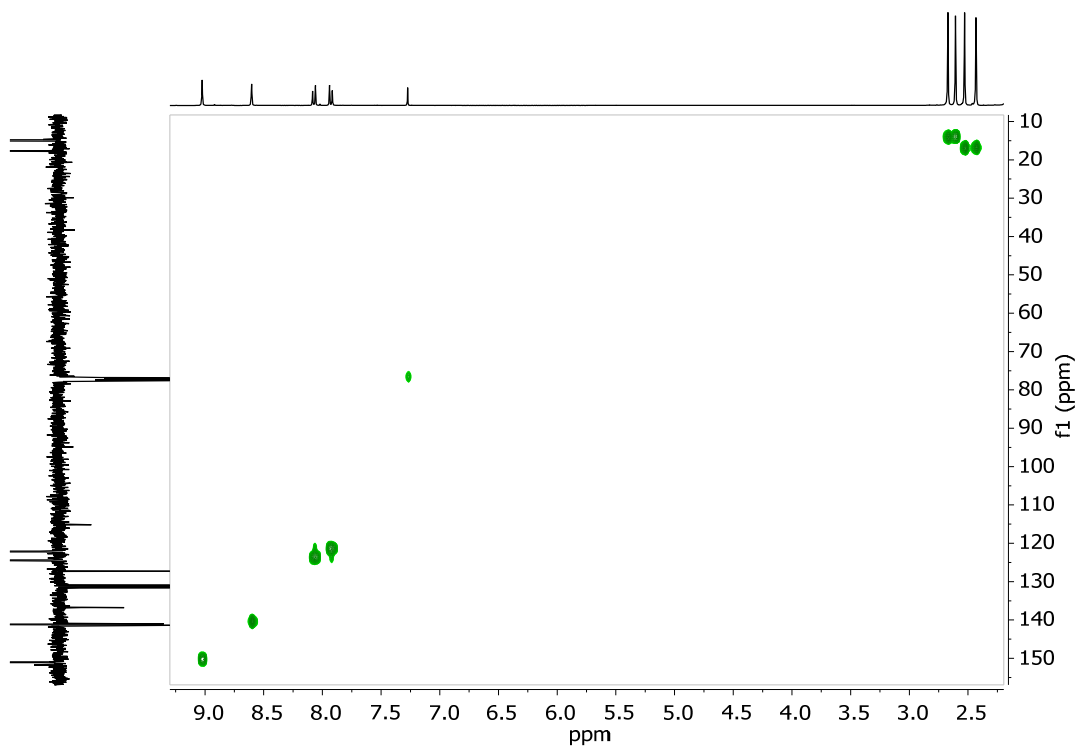

**Figure S14.** ( $^1\text{H}$ - $^{13}\text{C}$ ) HSQC NMR spectrum of TMPO in  $\text{CDCl}_3$  (400 MHz, 25  $^\circ\text{C}$ ).

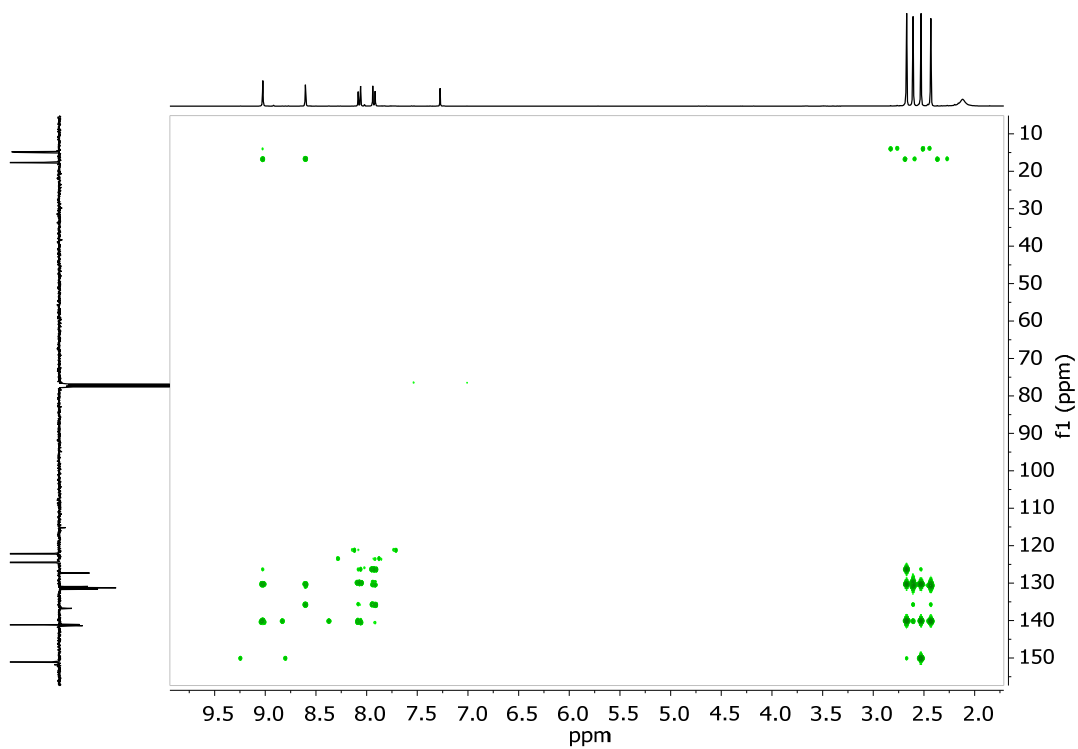

**Figure S15.** ( $^1\text{H}$ - $^{13}\text{C}$ ) HMBC NMR spectrum of TMPO in  $\text{CDCl}_3$  (400 MHz, 25  $^\circ\text{C}$ ).

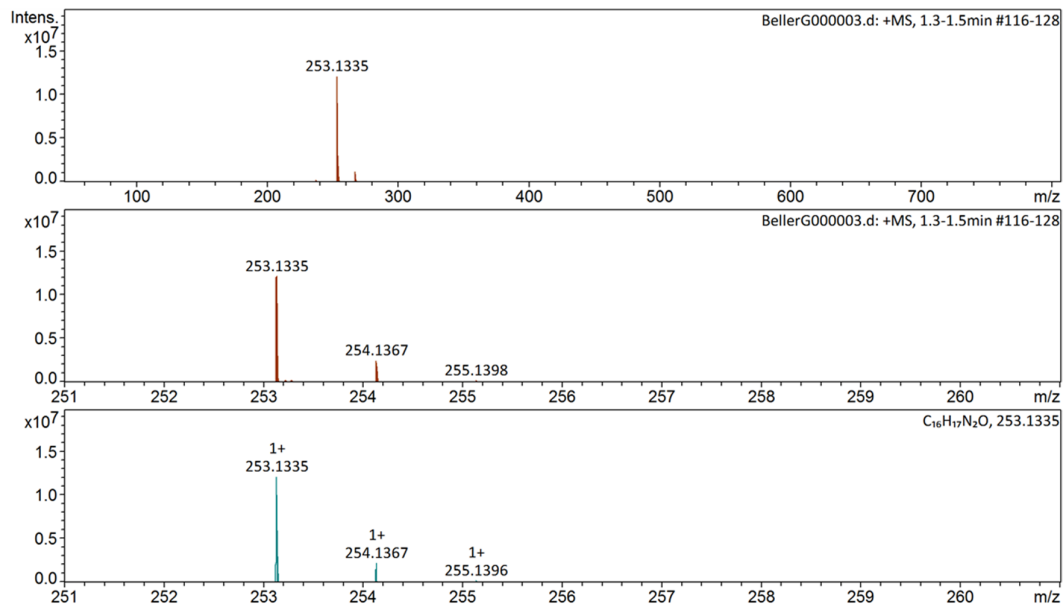

**Figure S16.** HRMS spectrum of TMPO in positive mode.



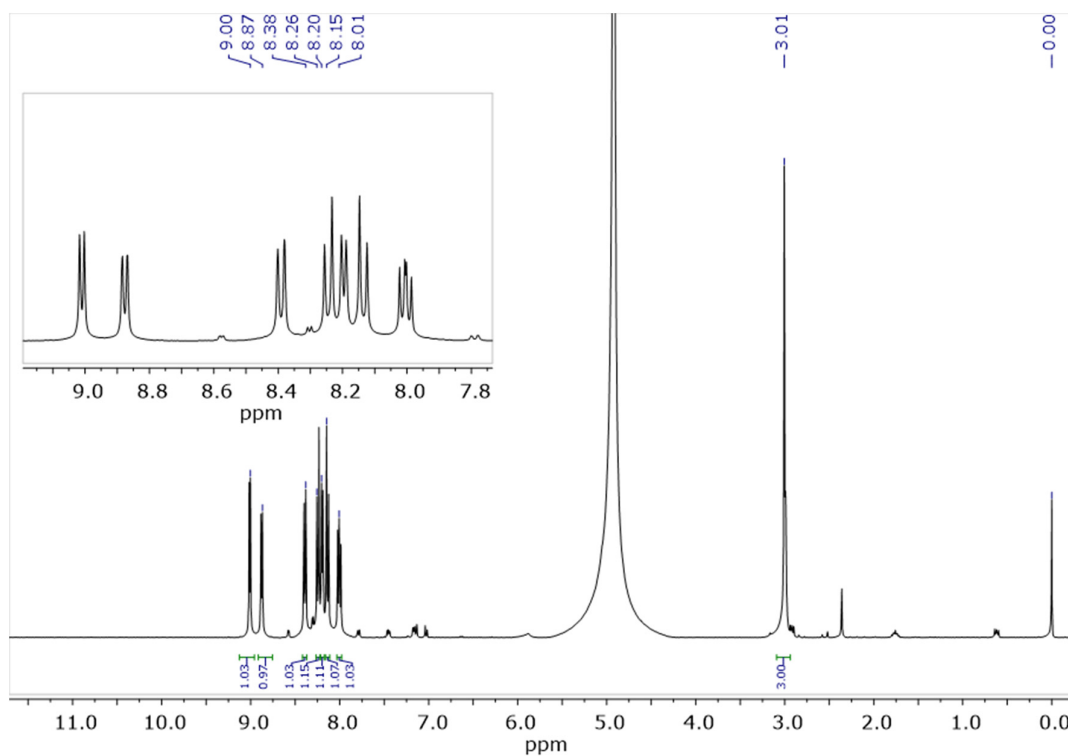

**Figure S17.**  $^1\text{H}$  NMR spectrum of 4MPO in  $\text{D}_2\text{O}$  (400 MHz, 25  $^\circ\text{C}$ ). Inset: Selected region of the aromatic part.

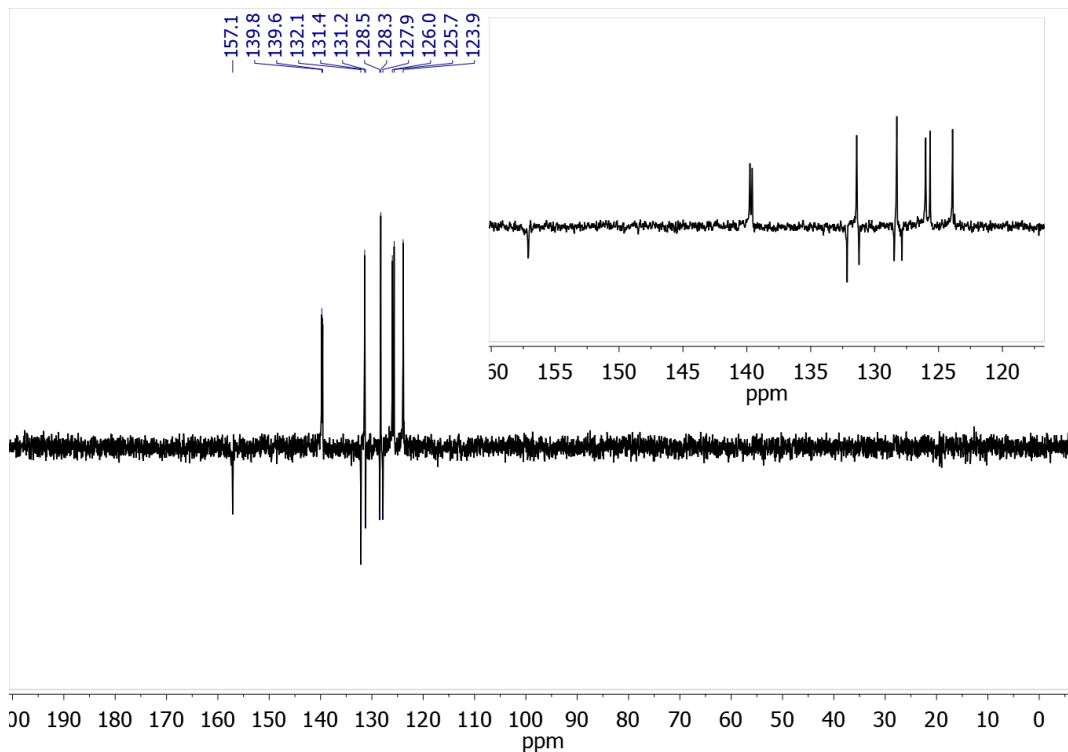

**Figure S18.** APT  $^{13}\text{C}$  NMR spectrum of 4MPO in  $\text{D}_2\text{O}$  (100.6 MHz, 25  $^\circ\text{C}$ ). Inset: Selected region of the aromatic part.

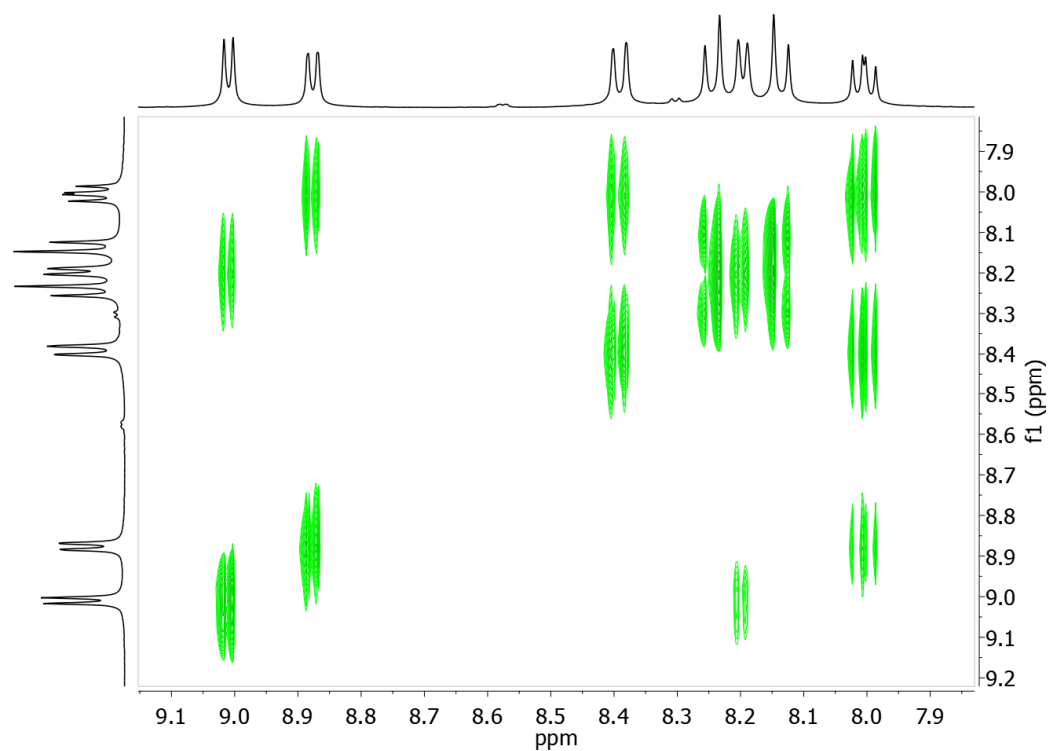

**Figure S19.**  $^1\text{H}$ - $^1\text{H}$  COSY45 NMR spectrum of 4MPO in  $\text{D}_2\text{O}$  (400 MHz, 25 °C). Inset: Selected region of the aromatic part.

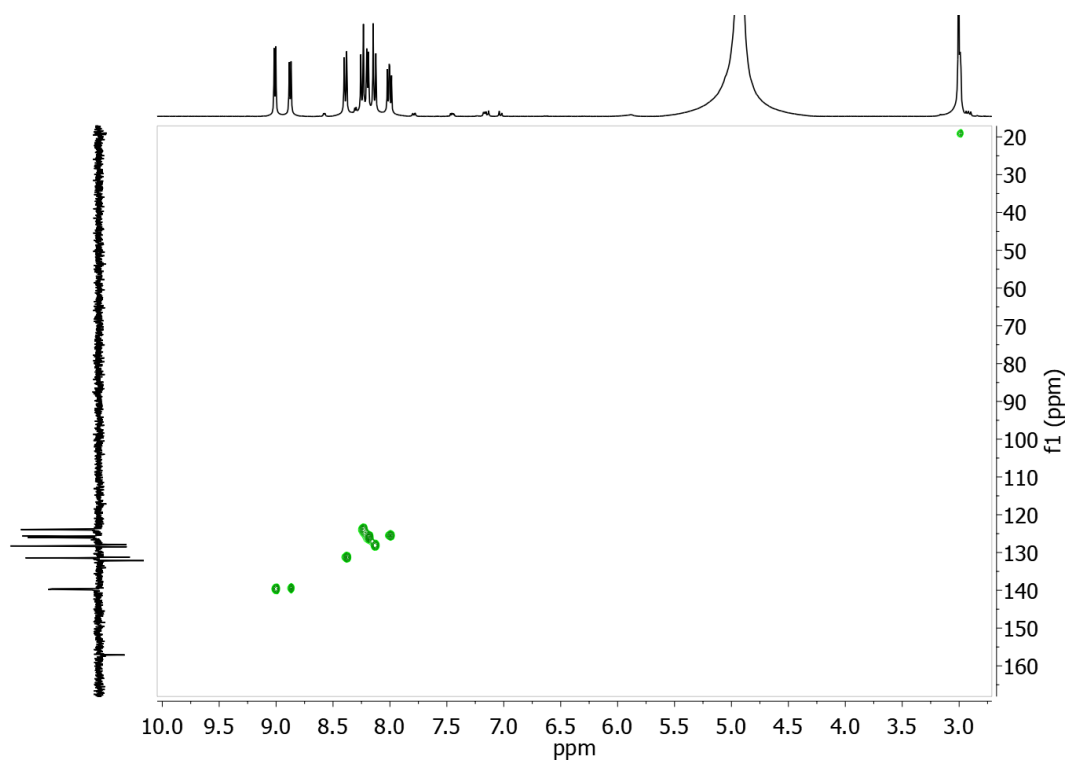

**Figure S20.** ( $^1\text{H}$ - $^{13}\text{C}$ ) HSQC NMR spectrum of 4MPO in  $\text{D}_2\text{O}$  (400 MHz, 25 °C).

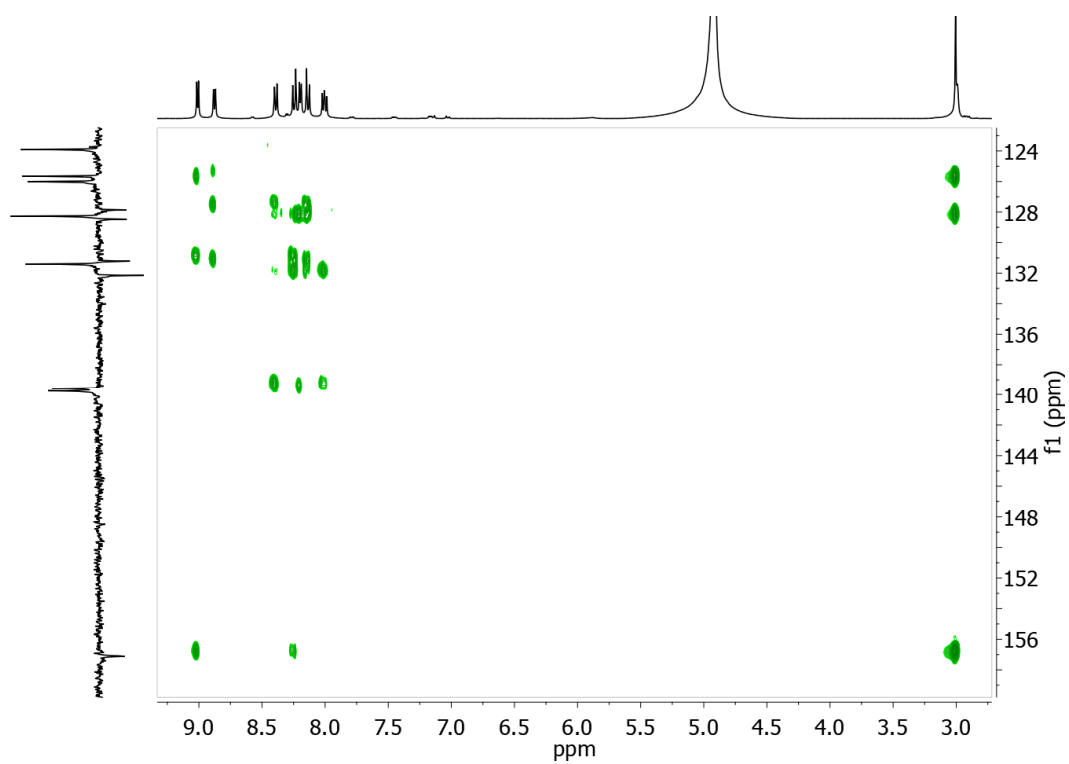

**Figure S21.** ( $^1\text{H}$ - $^{13}\text{C}$ ) HMBC NMR spectrum of 4MPO in  $\text{D}_2\text{O}$  (400 MHz, 25  $^\circ\text{C}$ ).

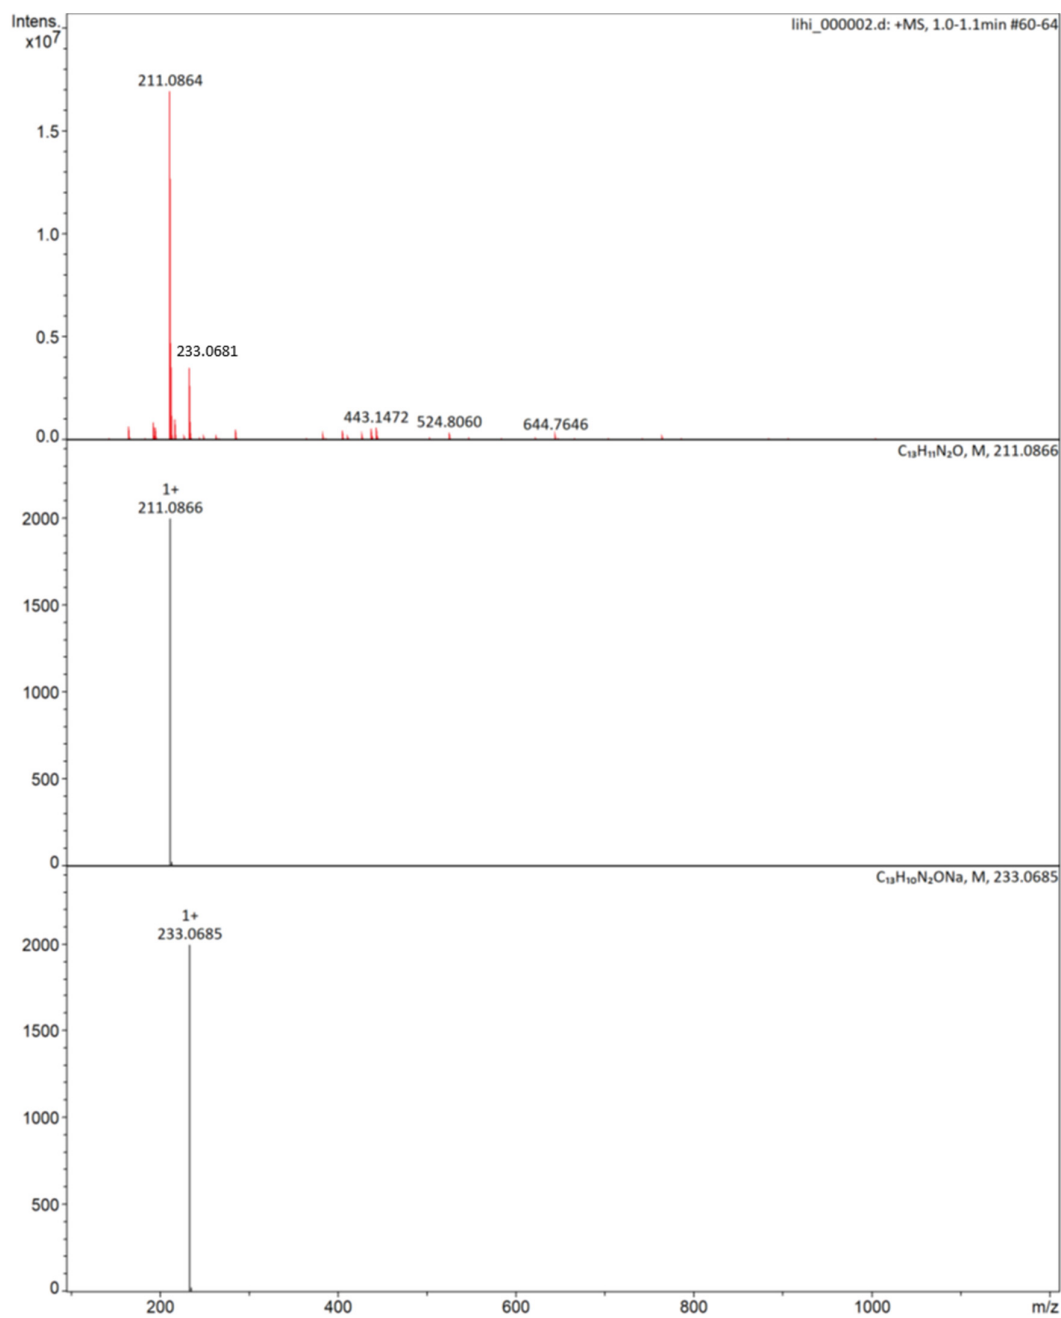

**Figure S22.** HRMS spectrum of 4MPO in positive mode.

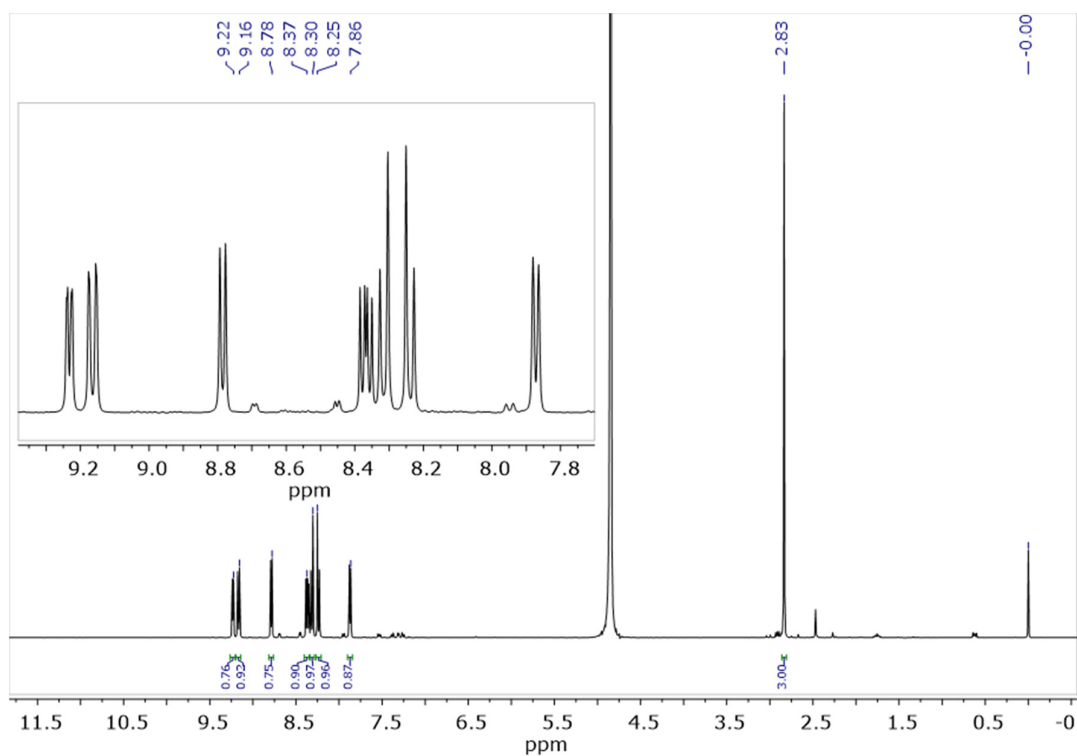

**Figure S23.**  $^1\text{H}$  NMR spectrum of 7MPO in  $\text{D}_2\text{O}$  (400 MHz, 25 °C). Inset: Selected region of the aromatic part.

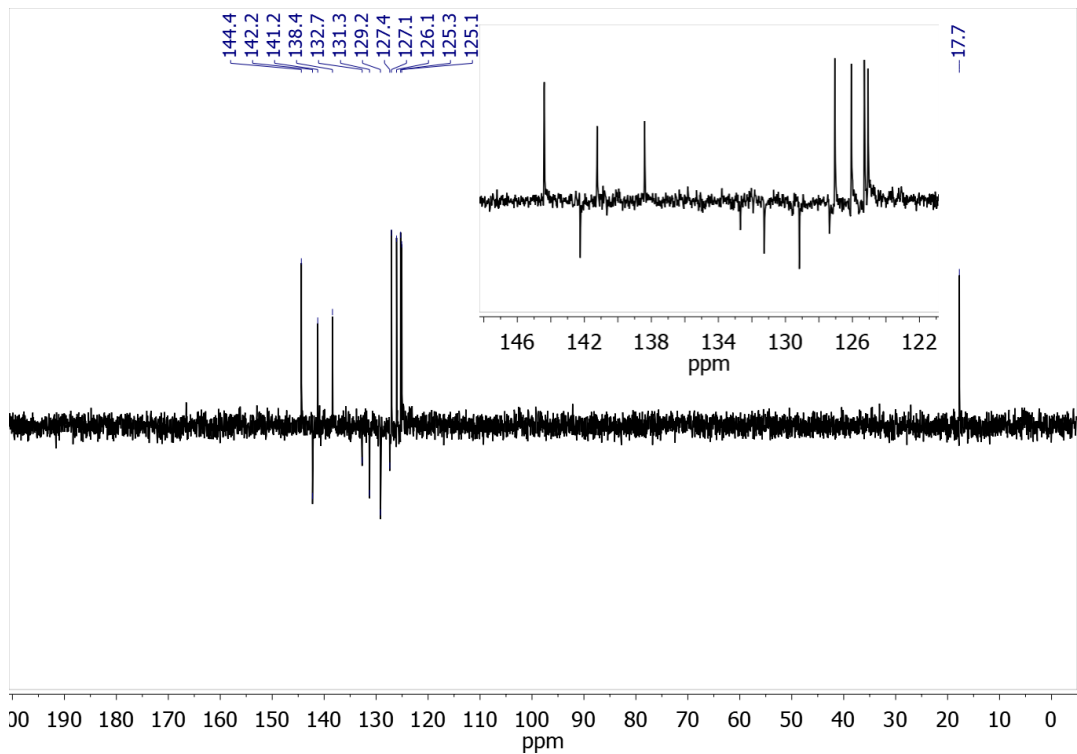

**Figure S24.** APT  $^{13}\text{C}$  NMR spectrum of 7MPO in  $\text{D}_2\text{O}$  (100.6 MHz, 25 °C). Inset: Selected region of the aromatic part.

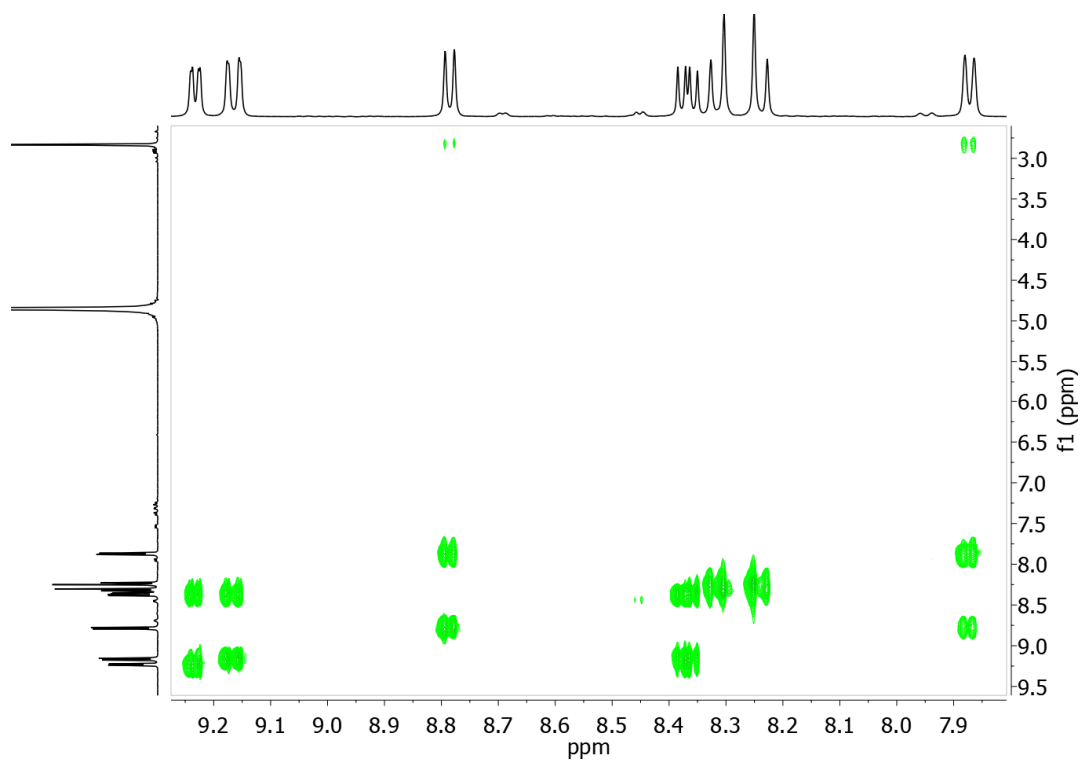

**Figure S25.**  $^1\text{H}$ - $^1\text{H}$  COSY45 NMR spectrum of 7MPO in  $\text{D}_2\text{O}$  (400 MHz, 25 °C). Inset: Selected region of the aromatic part.

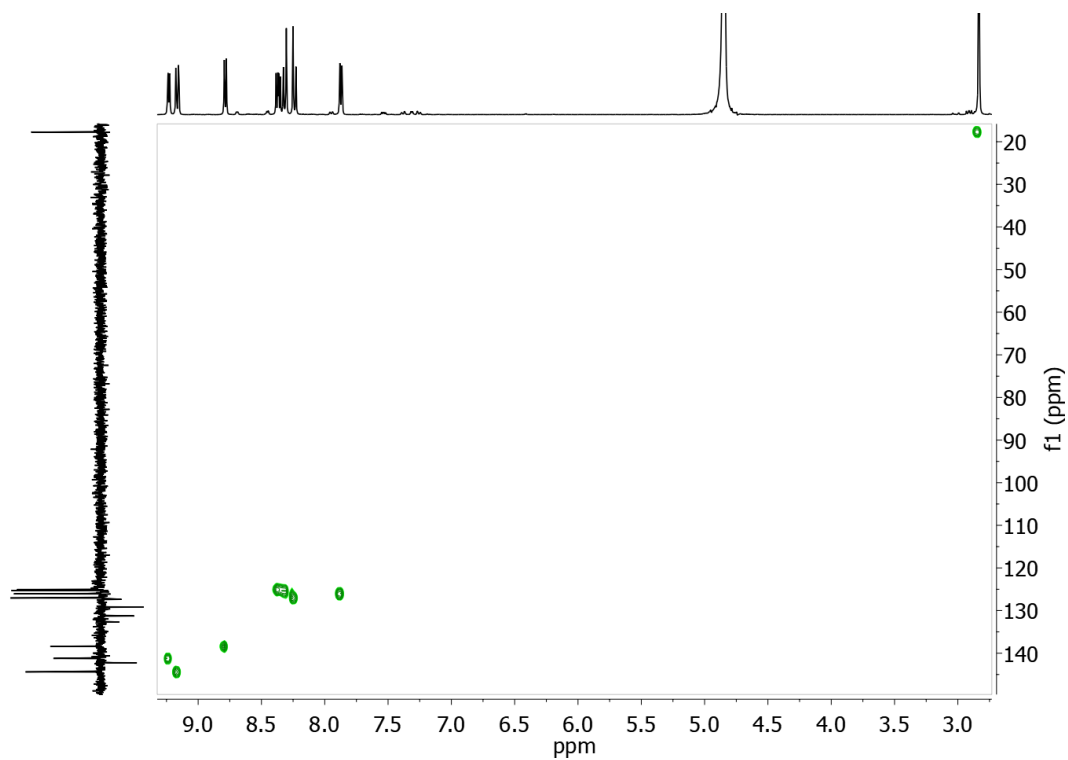

**Figure S26.** ( $^1\text{H}$ - $^{13}\text{C}$ ) HSQC NMR spectrum of 7MPO in  $\text{D}_2\text{O}$  (400 MHz, 25 °C).

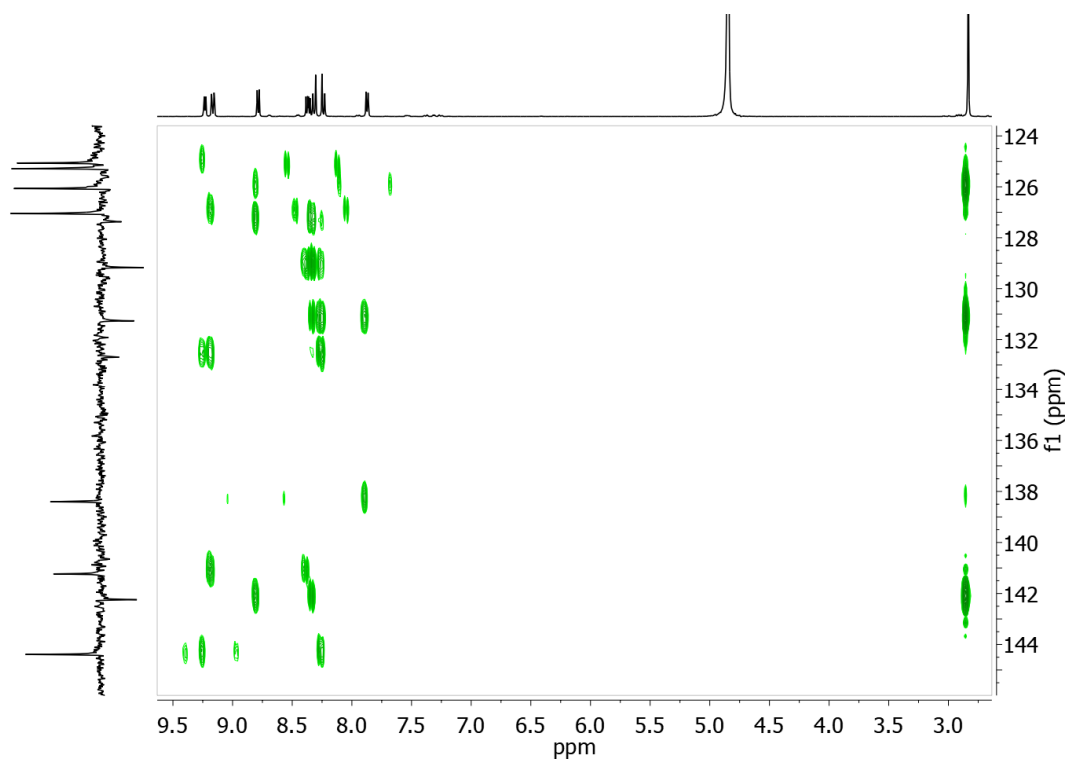

**Figure S27.** ( $^1\text{H}$ - $^{13}\text{C}$ ) HMBC NMR spectrum of 7MPO in  $\text{D}_2\text{O}$  (400 MHz, 25  $^\circ\text{C}$ ).

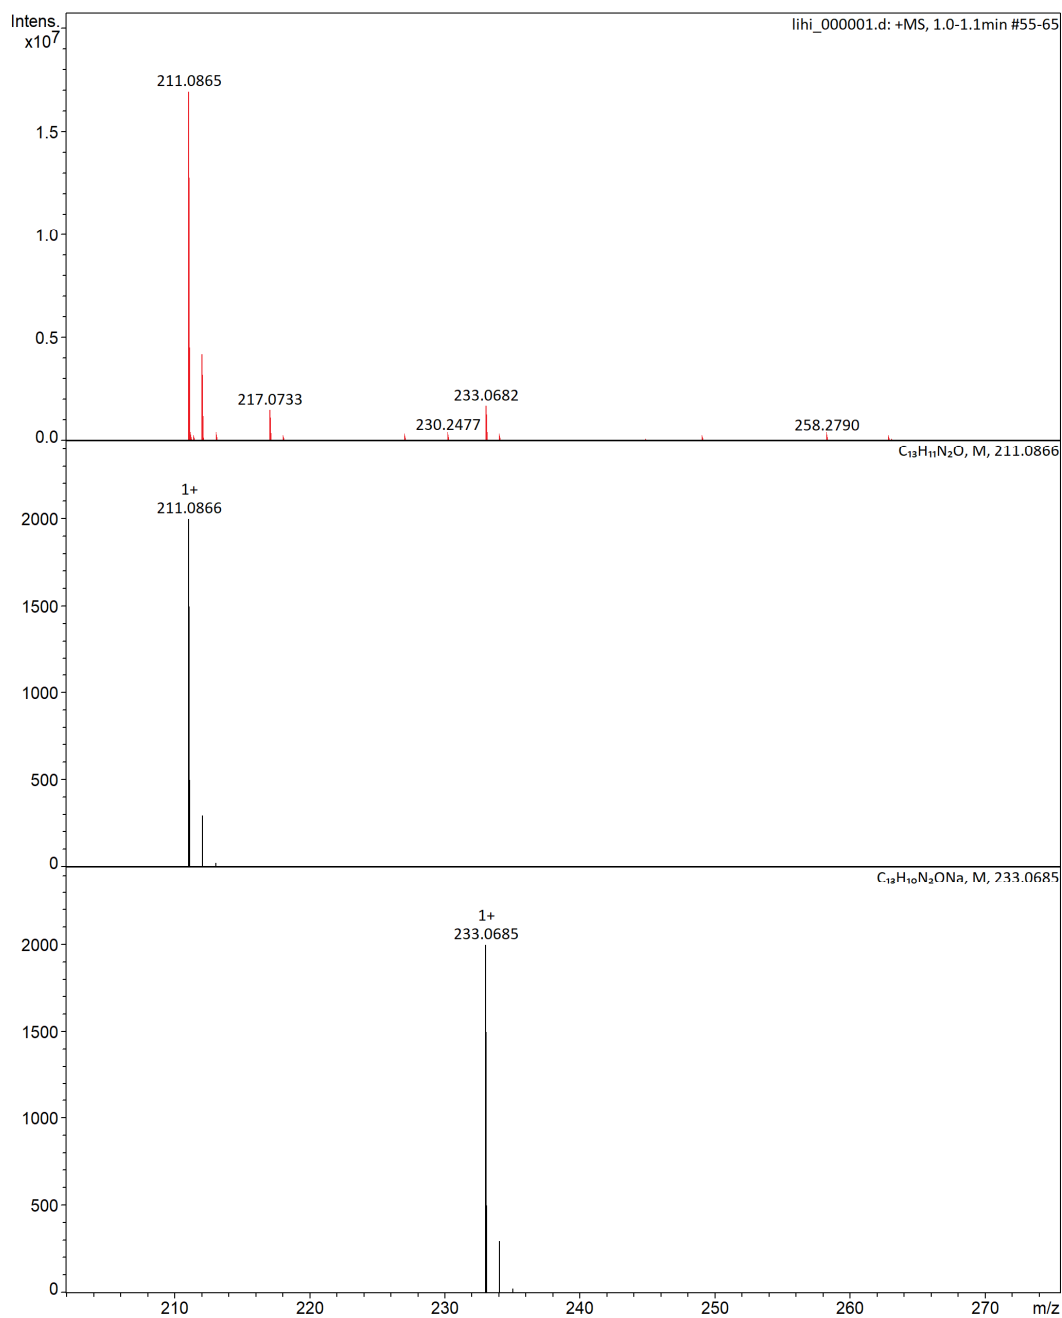

**Figure S28.** HRMS spectrum of 7MPO in positive mode.



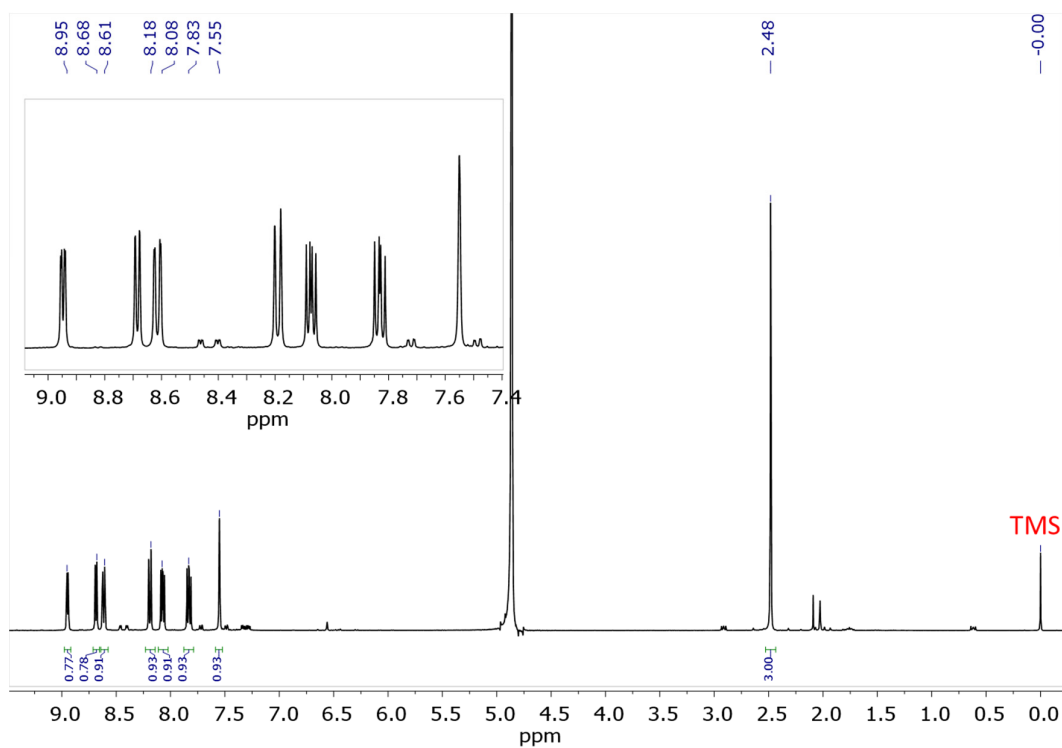

**Figure S29.** <sup>1</sup>H NMR spectrum of 5MPO in D<sub>2</sub>O (400 MHz, 25 °C). Inset: Selected region of the aromatic part.

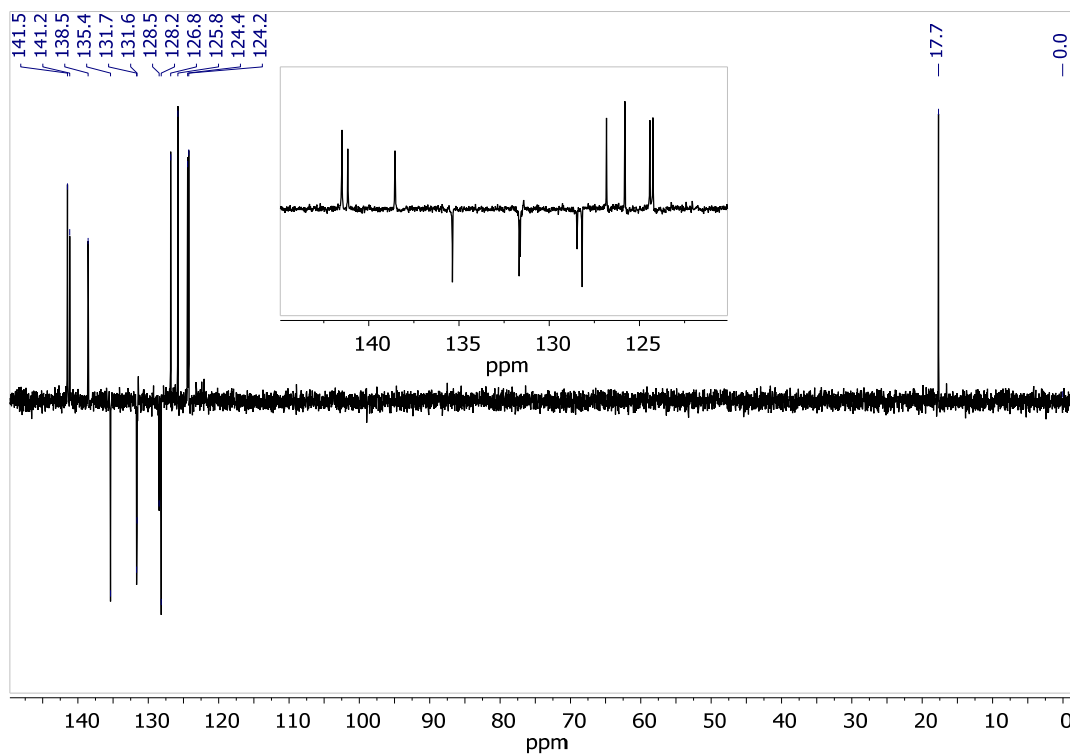

**Figure S30.** APT <sup>13</sup>C NMR spectrum of 5MPO in D<sub>2</sub>O (100.6 MHz, 25 °C). Inset: Selected region of the aromatic part.

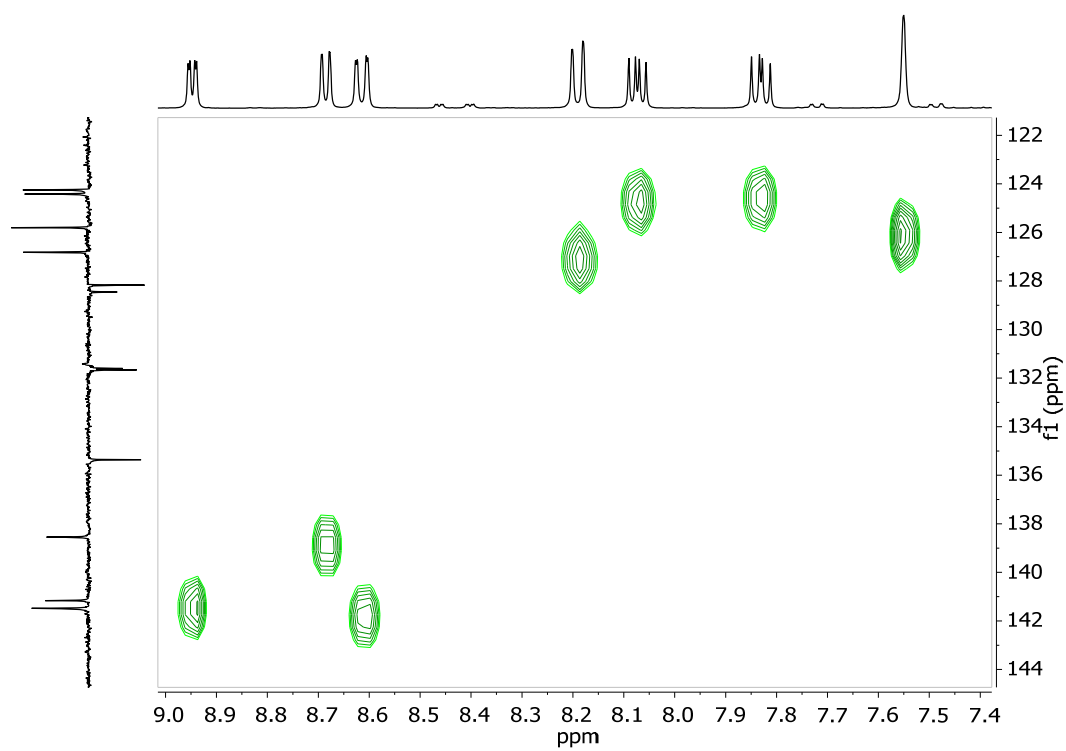

**Figure S31.** ( $^1\text{H}$ - $^{13}\text{C}$ ) HSQC NMR spectrum of 5MPO in  $\text{D}_2\text{O}$  (400 MHz, 25 °C).

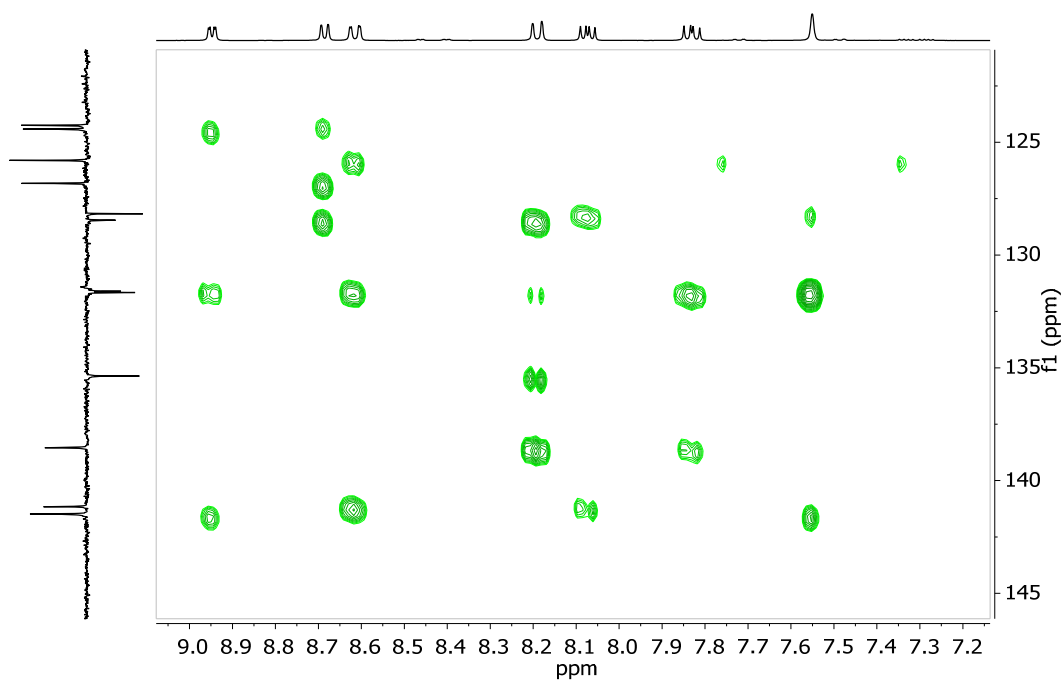

**Figure S32.** ( $^1\text{H}$ - $^{13}\text{C}$ ) HMBC NMR spectrum of 5MPO in  $\text{D}_2\text{O}$  (400 MHz, 25 °C).

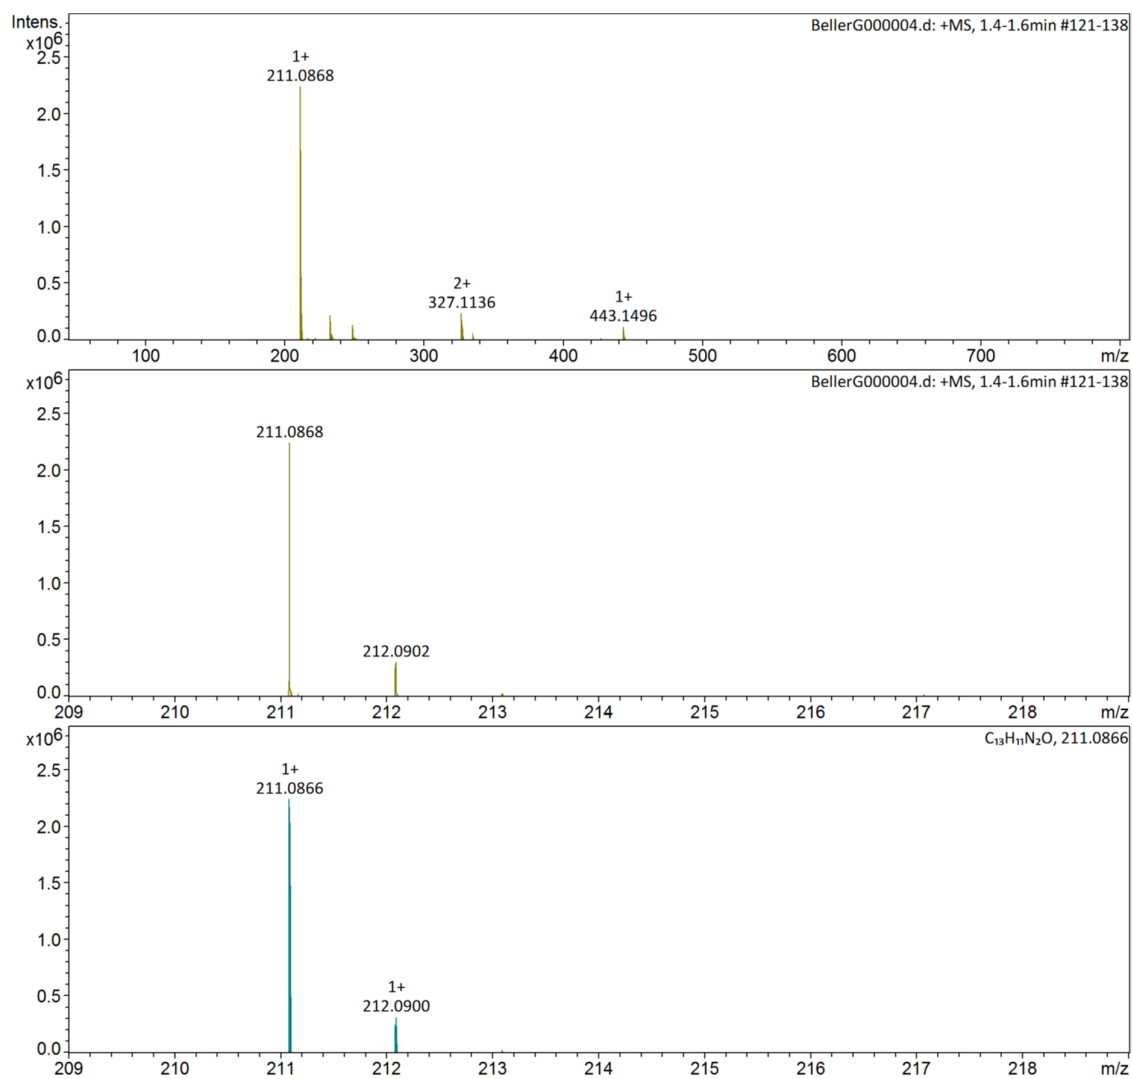

**Figure S33.** HRMS spectrum of 5MPO in positive mode.

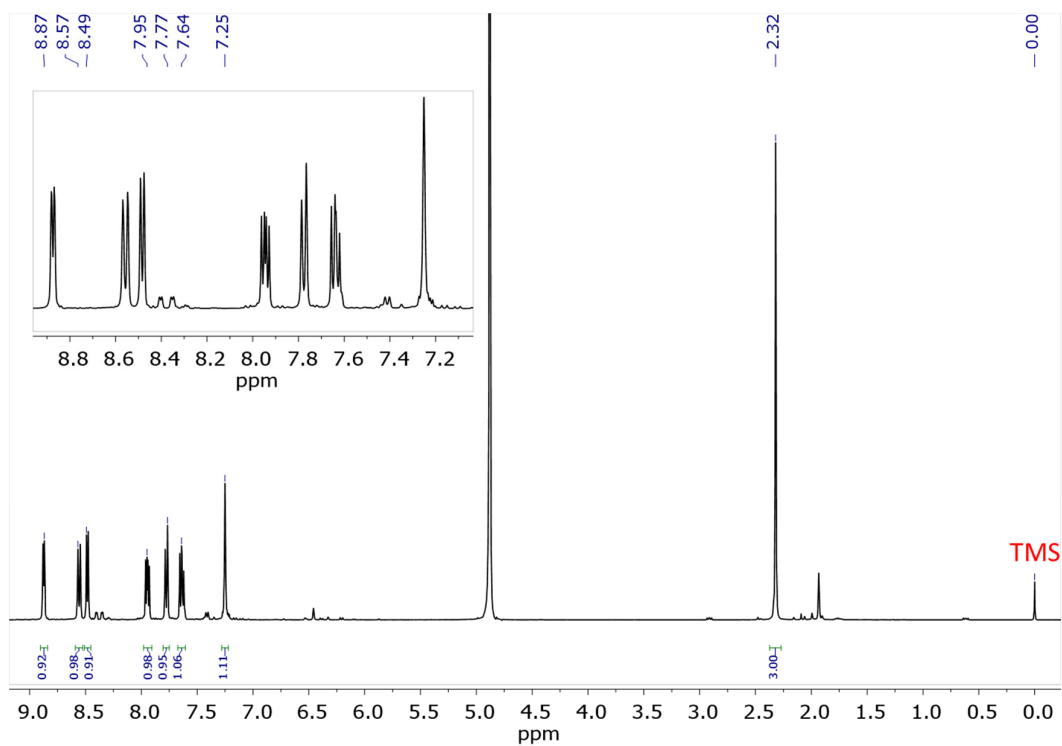

**Figure S34.** <sup>1</sup>H NMR spectrum of 6MPO in D<sub>2</sub>O (400 MHz, 25 °C). Inset: Selected region of the aromatic part.

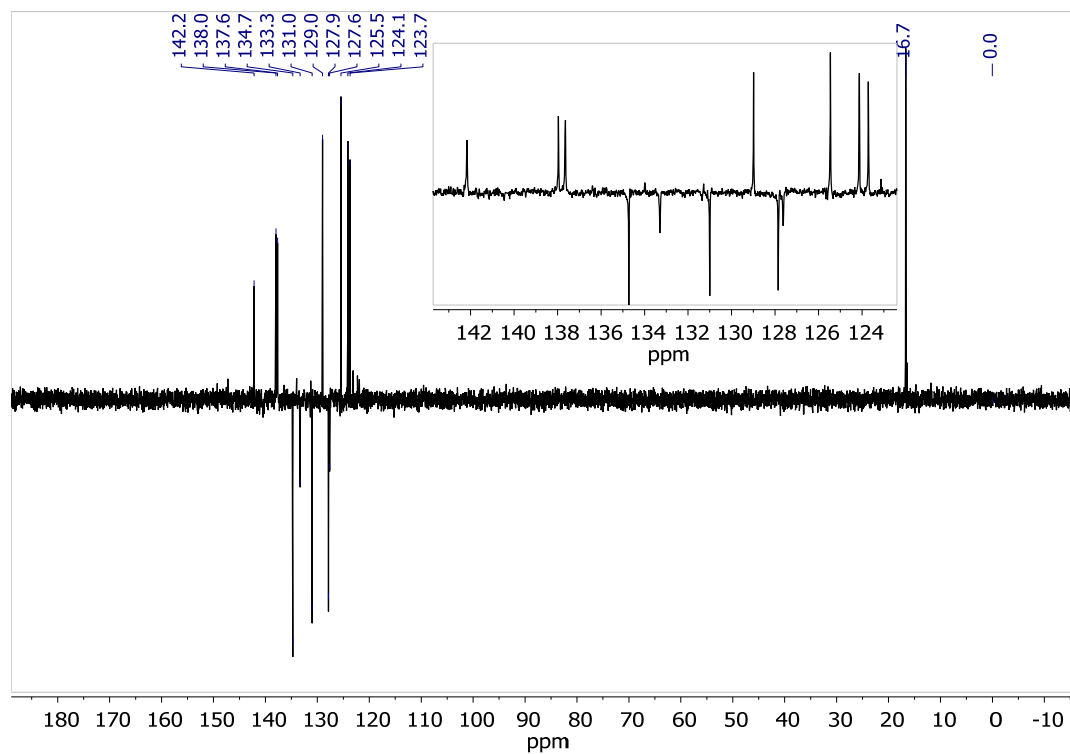

**Figure S35.** APT <sup>13</sup>C NMR spectrum of 6MPO in D<sub>2</sub>O (100.6 MHz, 25 °C). Inset: Selected region of the aromatic part.

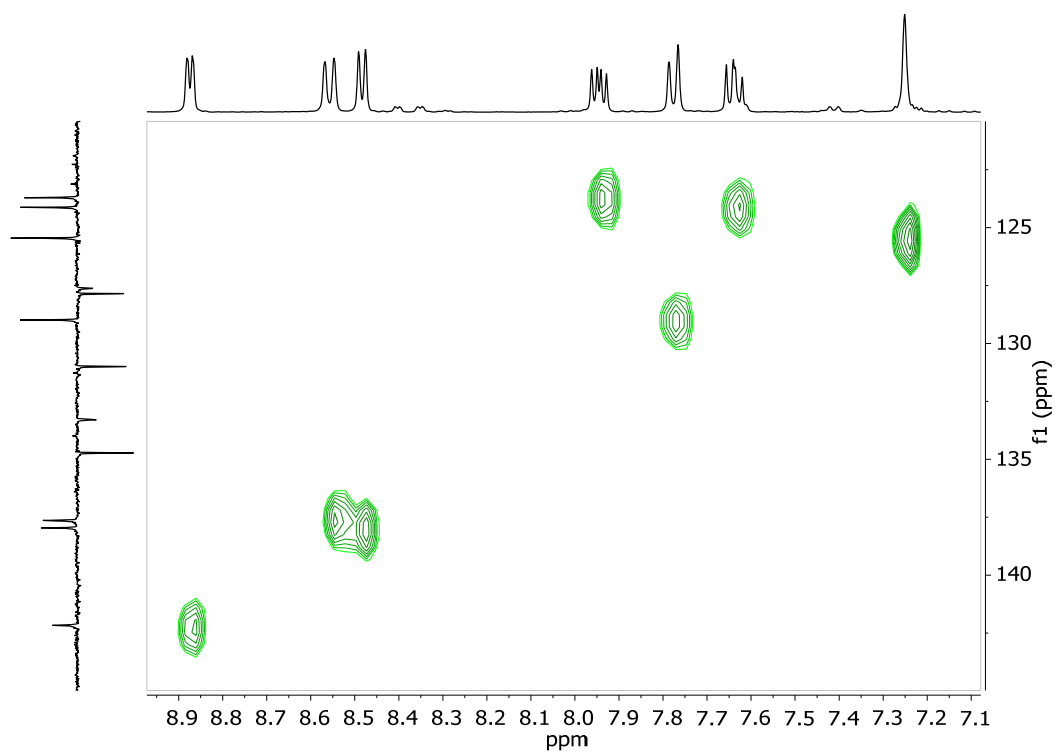

**Figure S36.** ( $^1\text{H}$ - $^{13}\text{C}$ ) HSQC NMR spectrum of 6MPO in  $\text{D}_2\text{O}$  (400 MHz, 25 °C).

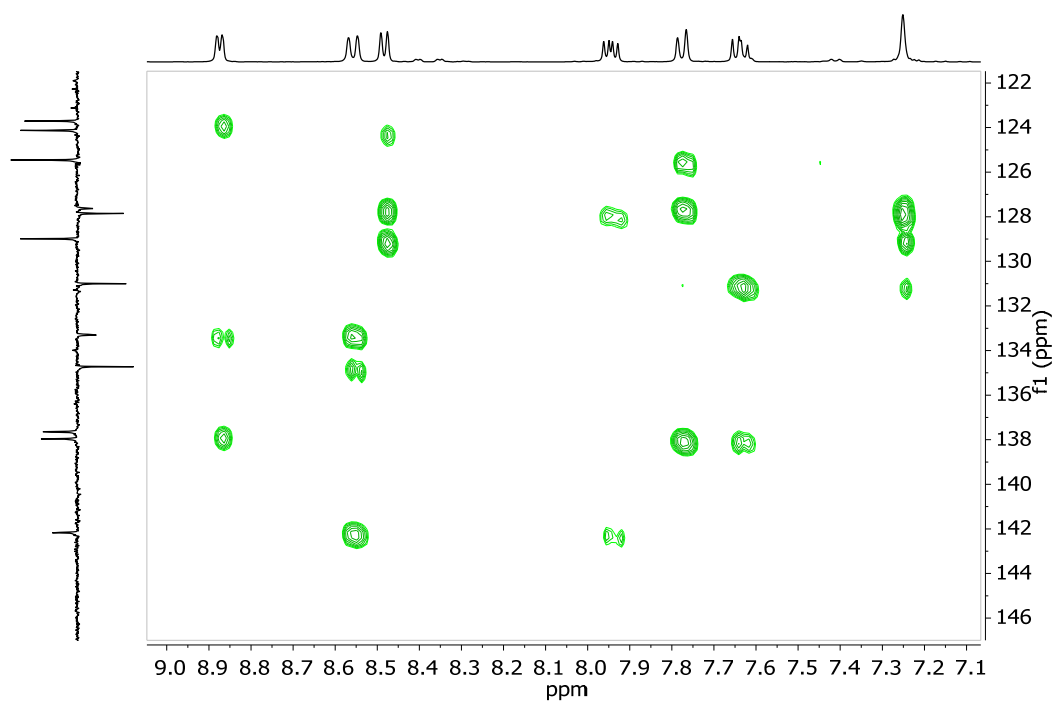

**Figure S37.** ( $^1\text{H}$ - $^{13}\text{C}$ ) HMBC NMR spectrum of 6MPO in  $\text{D}_2\text{O}$  (400 MHz, 25 °C).

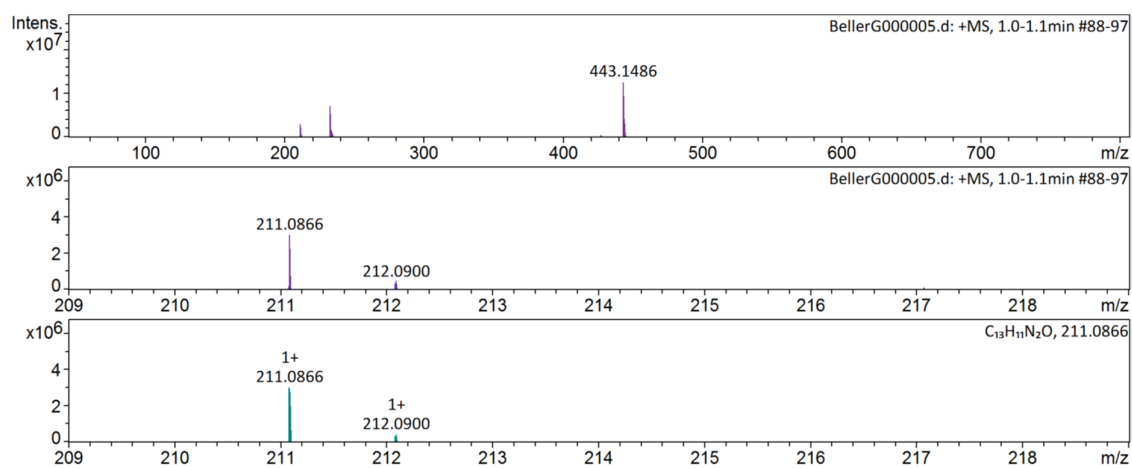

**Figure S38.** HRMS spectrum of 6MPO in positive mode.

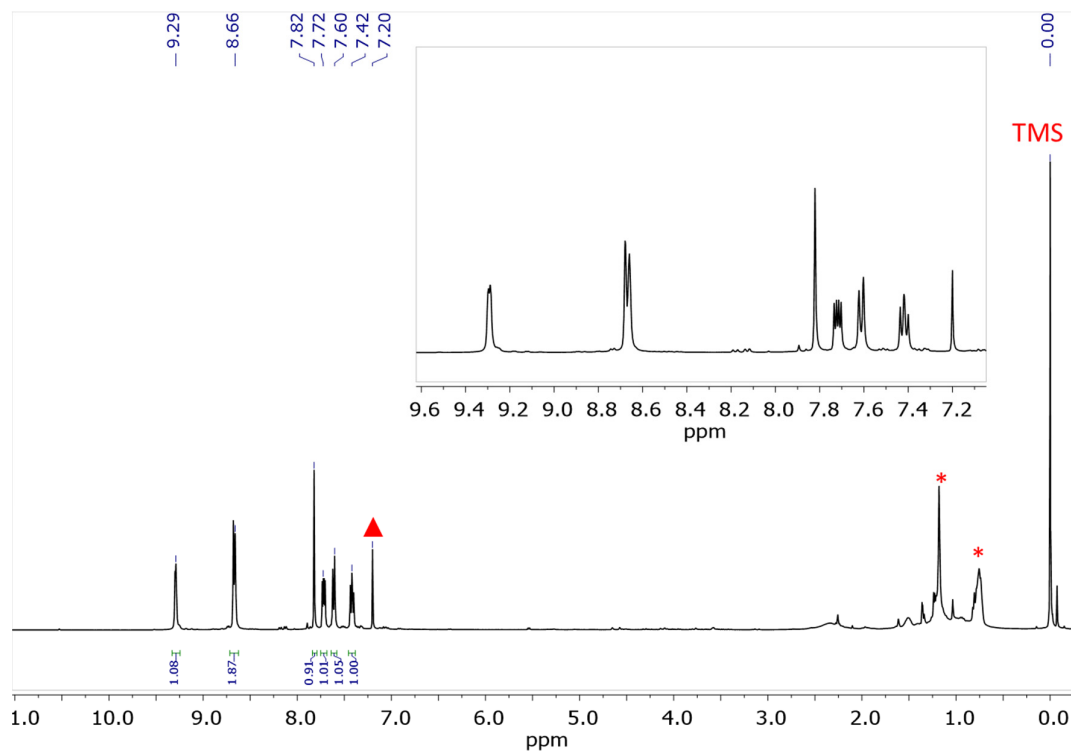

**Figure S39.**  $^1H$  NMR spectrum of 5CPO in  $CDCl_3$  (400 MHz, 25 °C).  $\blacktriangle$  indicates solvent residual peak and asterisks show solvent impurity. Inset: Selected region of the aromatic part.

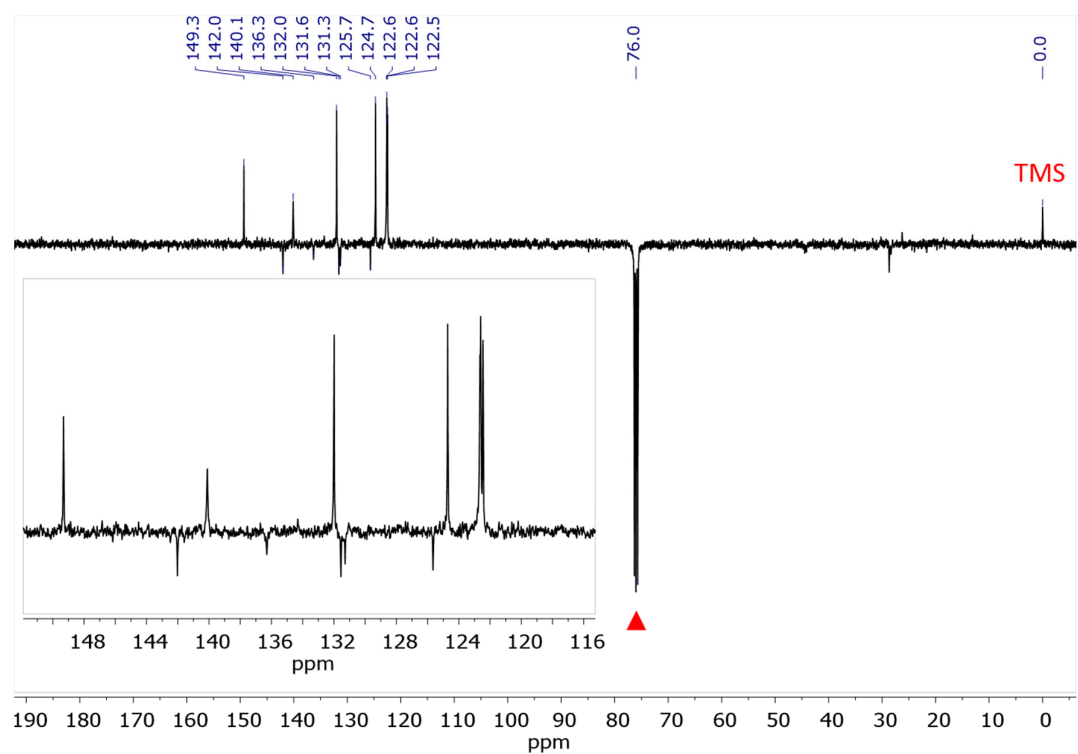

**Figure S40.** APT  $^{13}\text{C}$  NMR spectrum of 5CPO in  $\text{CDCl}_3$  (100.6 MHz, 25  $^\circ\text{C}$ ).  $\blacktriangle$  indicates the solvent residual peak. Inset: Selected region of the aromatic part.

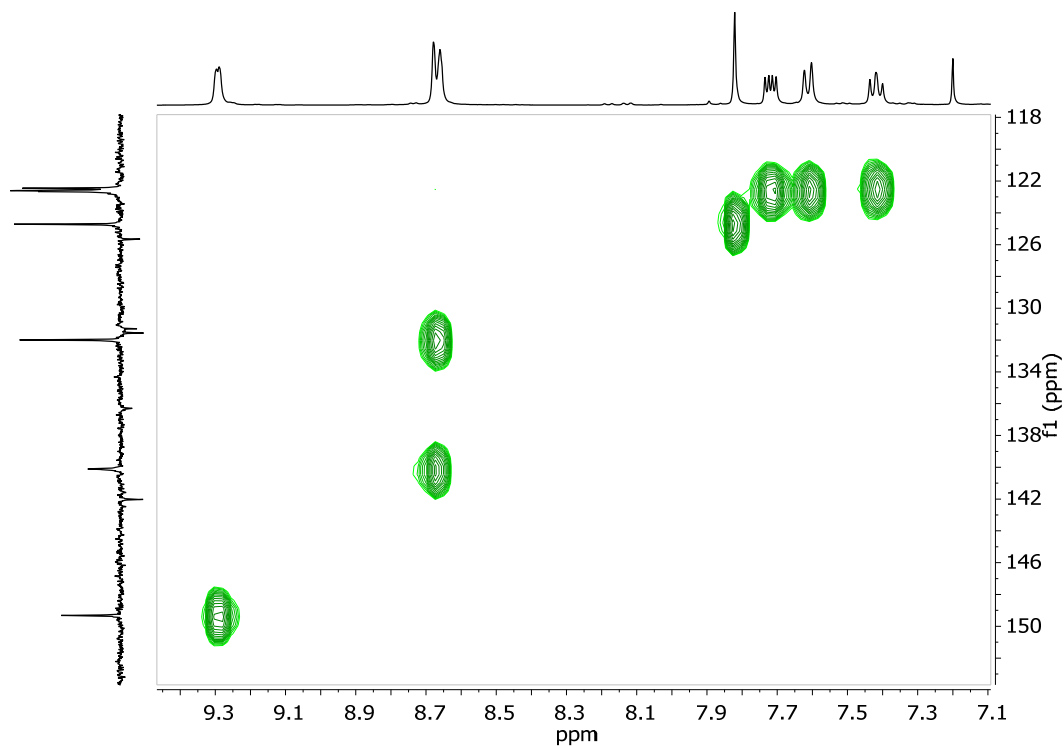

**Figure S41.** ( $^1\text{H}$ - $^{13}\text{C}$ ) HSQC NMR spectrum of 5CPO in  $\text{CDCl}_3$  (400 MHz, 25  $^\circ\text{C}$ ).

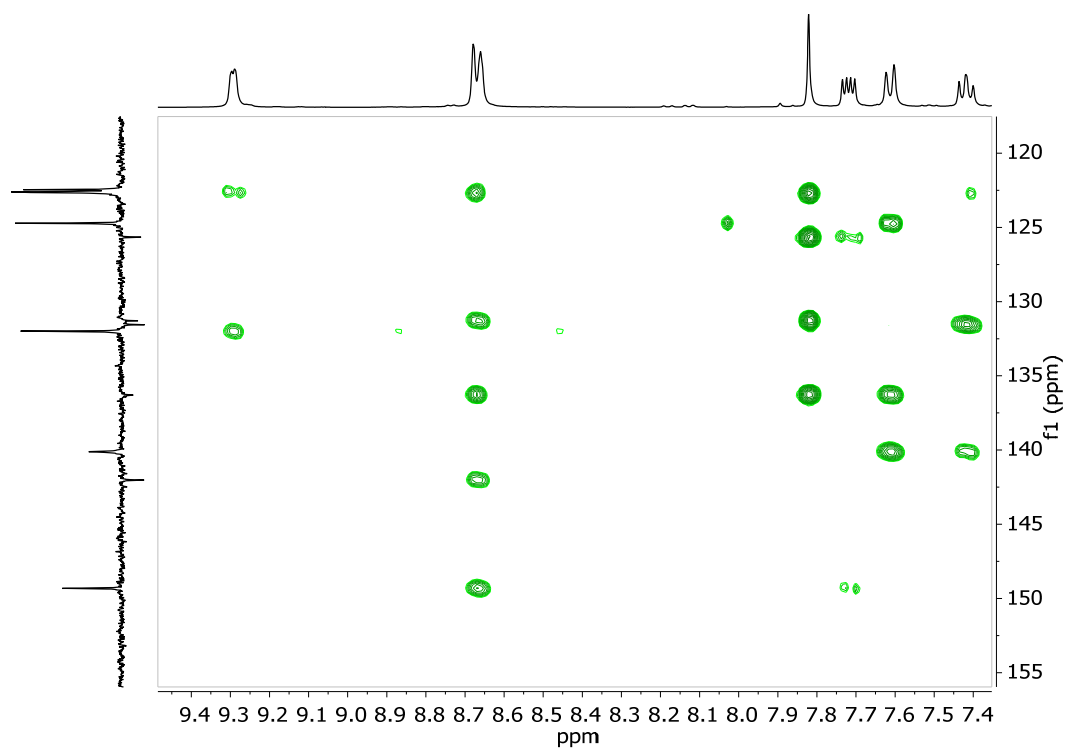

**Figure S42.** ( $^1\text{H}$ - $^{13}\text{C}$ ) HMBC NMR spectrum of 5CPO in  $\text{CDCl}_3$  (400 MHz, 25  $^\circ\text{C}$ ).



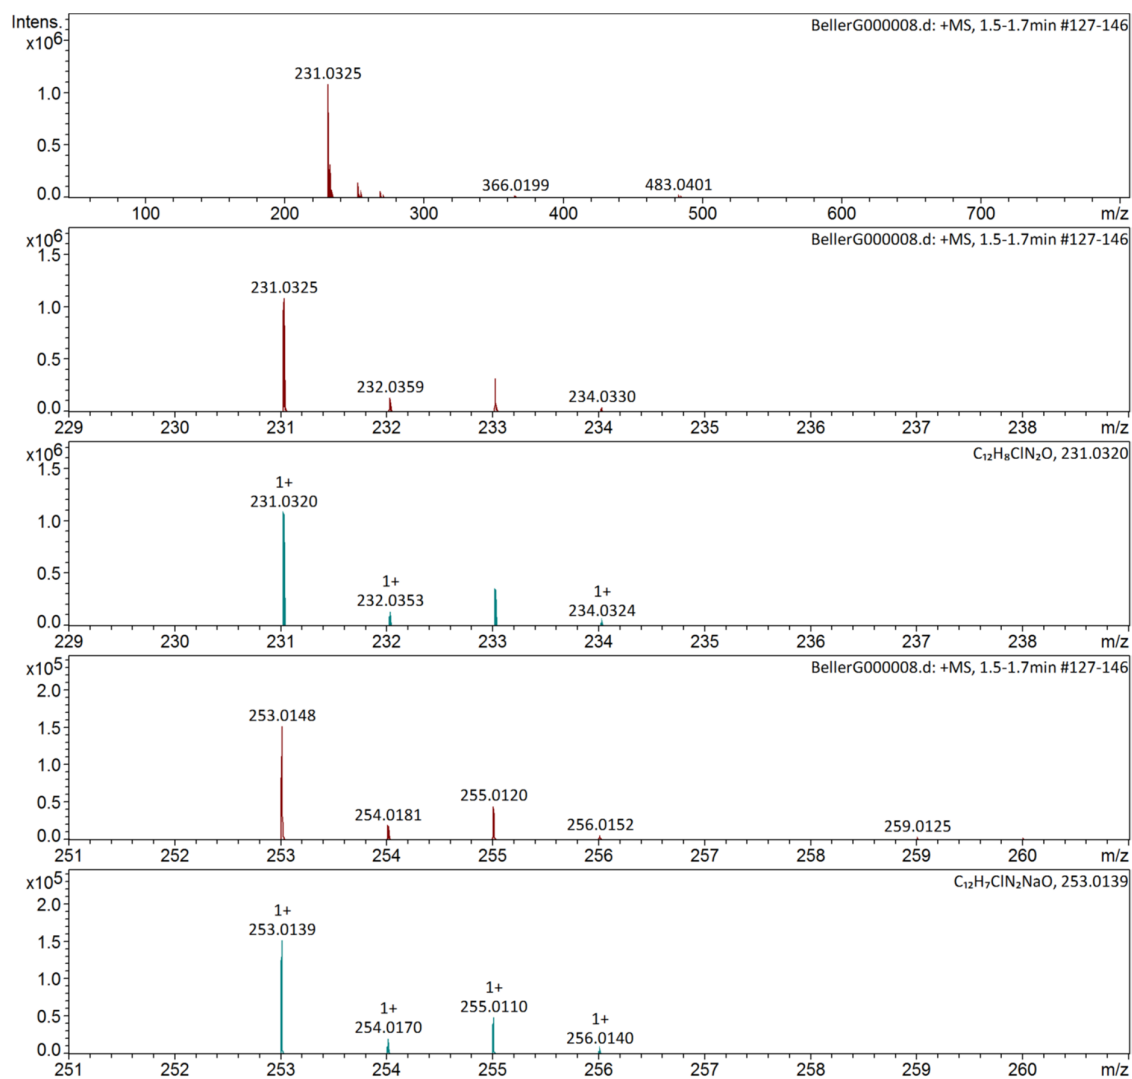

**Figure S43.** HRMS spectrum of 5CPO in positive mode.

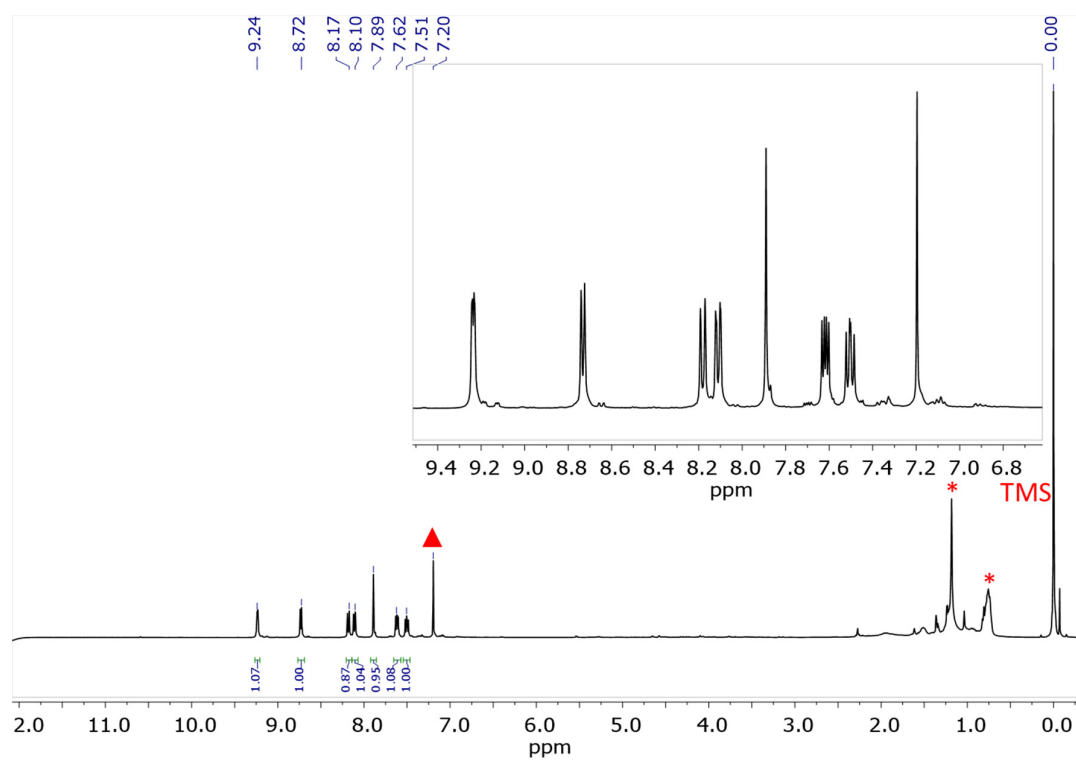

**Figure S44.**  $^1\text{H}$  NMR spectrum of 6CPO in  $\text{CDCl}_3$  (400 MHz, 25  $^\circ\text{C}$ ). ▲ indicates solvent residual peak and asterisks show solvent impurity. Inset: Selected region of the aromatic part.

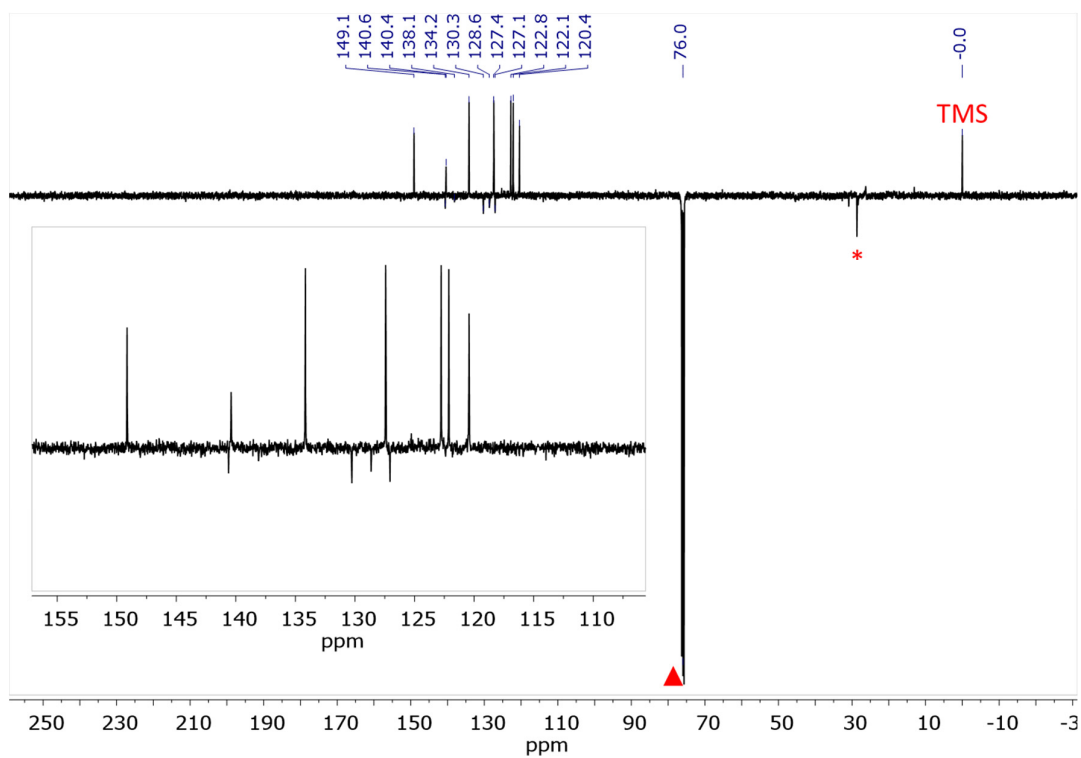

**Figure S45.** APT  $^{13}\text{C}$  NMR spectrum of 6CPO in  $\text{CDCl}_3$  (100.6 MHz, 25 °C).  $\blacktriangle$  indicates the solvent residual peak and asterisk shows solvent impurity. Inset: Selected region of the aromatic part.

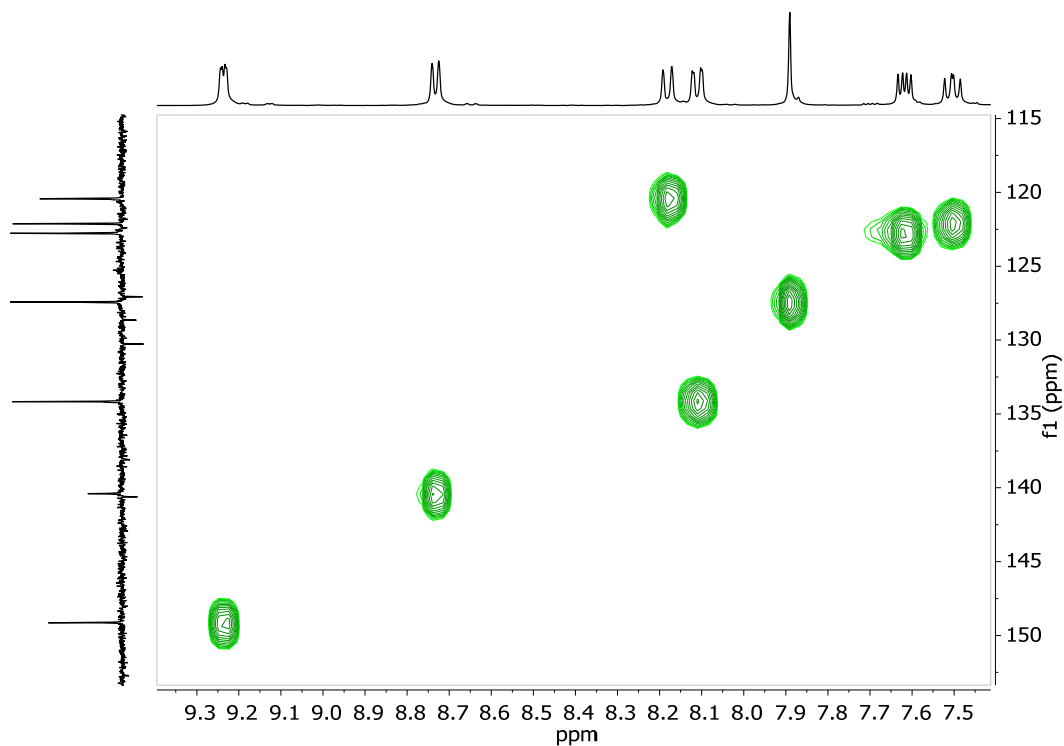

**Figure S46.** ( $^1\text{H}$ - $^{13}\text{C}$ ) HSQC NMR spectrum of 6CPO in  $\text{CDCl}_3$  (400 MHz, 25 °C).

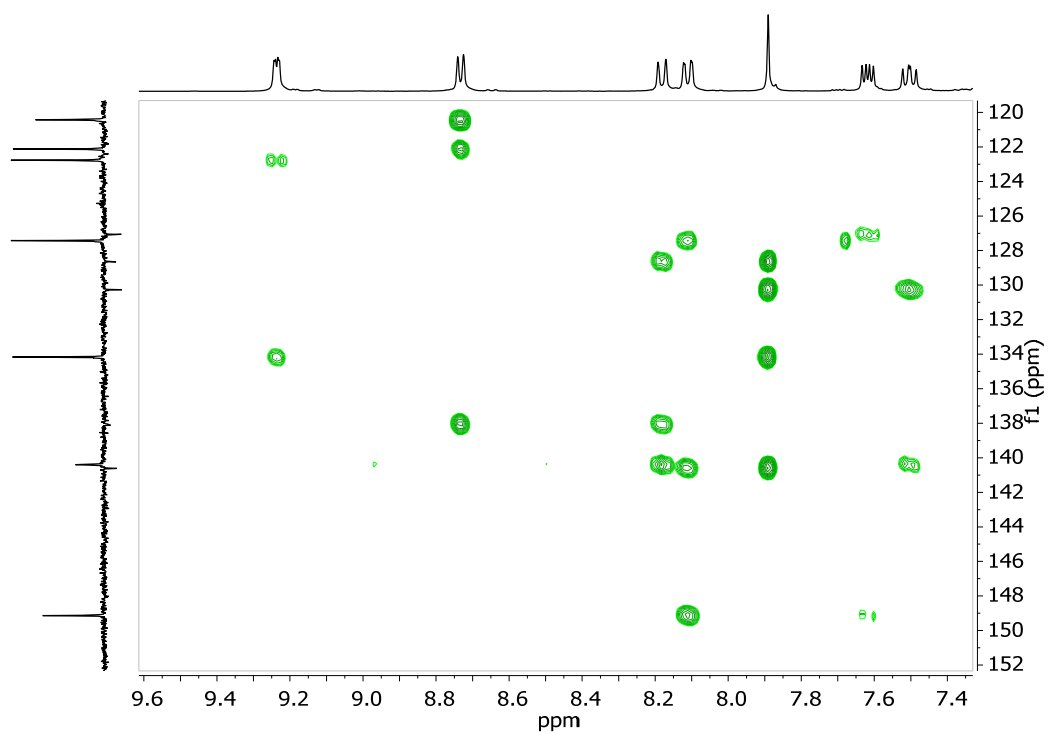

**Figure S47.** ( $^1\text{H}$ - $^{13}\text{C}$ ) HMBC NMR spectrum of 6CPO in  $\text{CDCl}_3$  (400 MHz, 25  $^\circ\text{C}$ ).

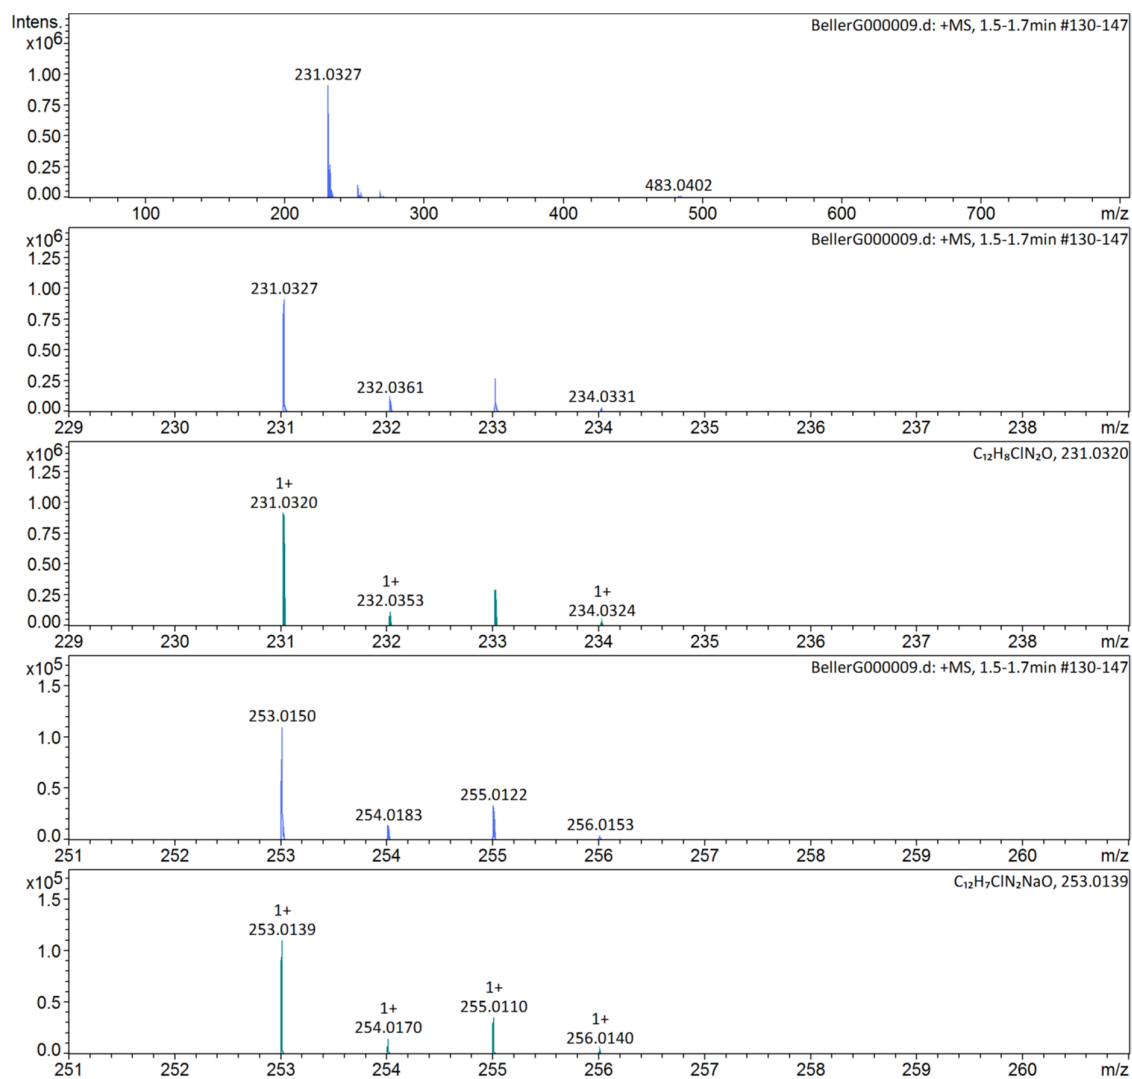

**Figure S48.** HRMS spectrum of 6CPO in positive mode.

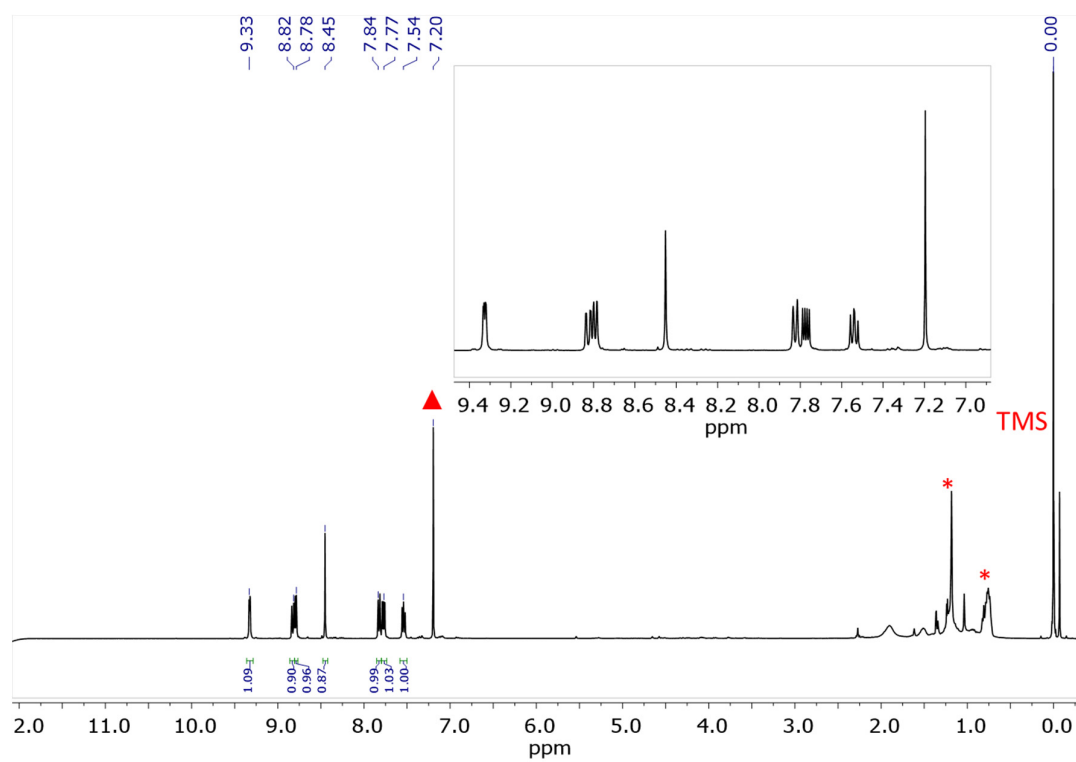

**Figure S49.**  $^1\text{H}$  NMR spectrum of 5NPO in  $\text{CDCl}_3$  (400 MHz, 25  $^\circ\text{C}$ ).  $\blacktriangle$  indicates solvent residual peak and asterisks show solvent impurity. Inset: Selected region of the aromatic part.

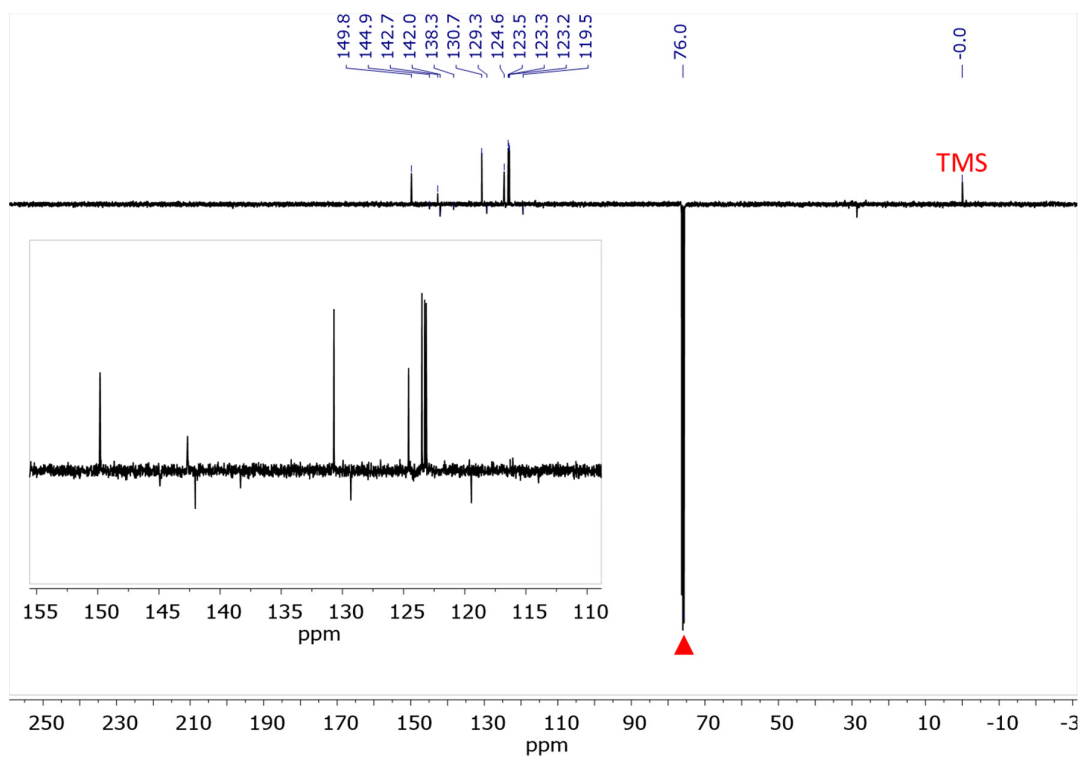

**Figure S50.** APT  $^{13}\text{C}$  NMR spectrum of 5NPO in  $\text{CDCl}_3$  (100.6 MHz, 25 °C).  $\blacktriangle$  indicates the solvent residual peak. Inset: Selected region of the aromatic part.

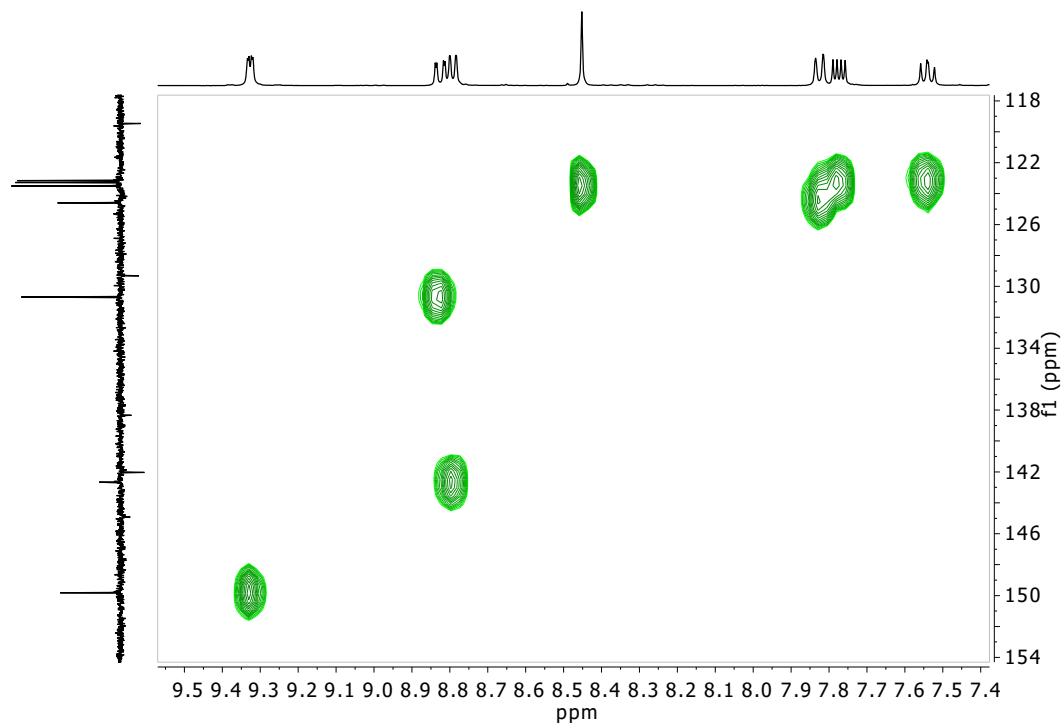

**Figure S51.** ( $^1\text{H}$ - $^{13}\text{C}$ ) HSQC NMR spectrum of 5NPO in  $\text{CDCl}_3$  (400 MHz, 25 °C).

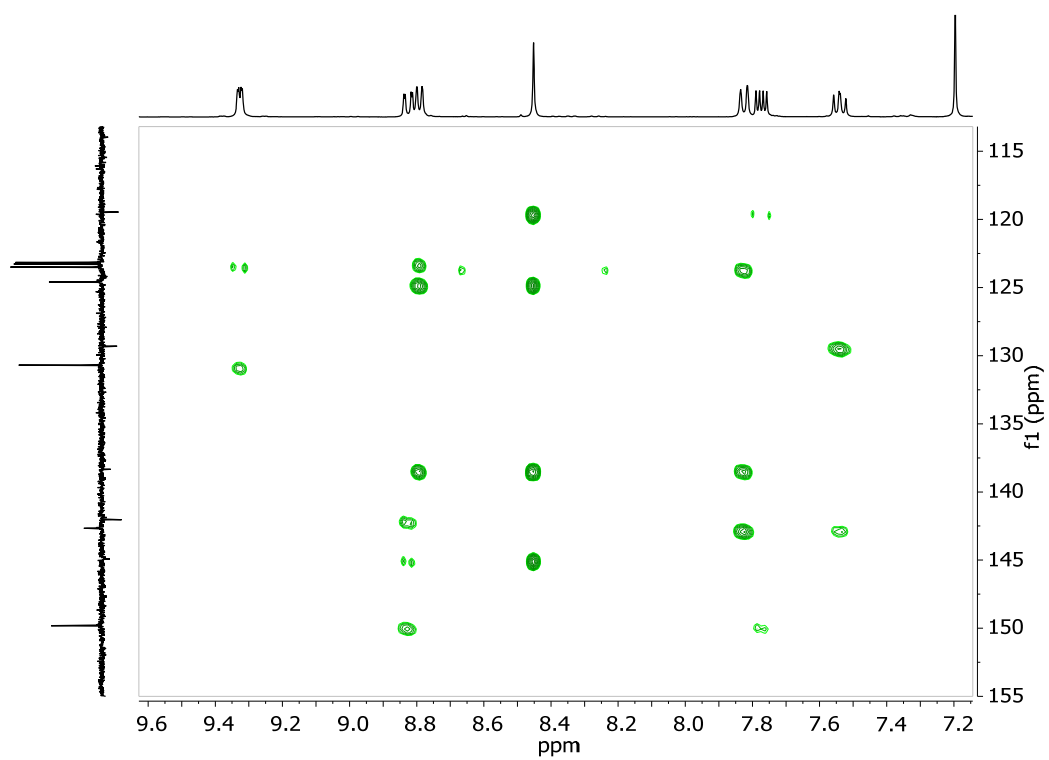

**Figure S52.** ( $^1\text{H}$ - $^{13}\text{C}$ ) HMBC NMR spectrum of 5NPO in  $\text{CDCl}_3$  (400 MHz, 25  $^\circ\text{C}$ ).



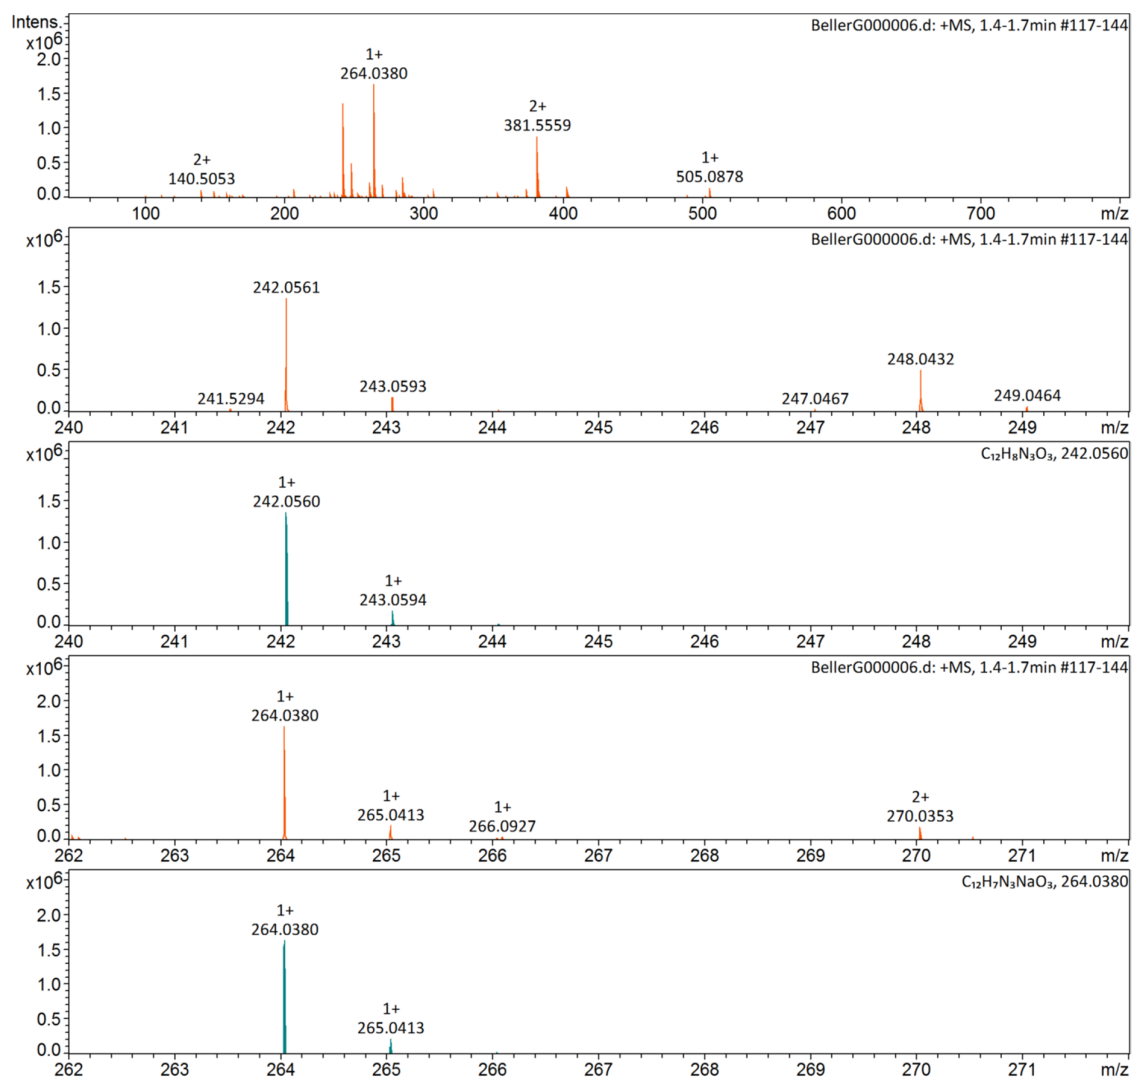

**Figure S53.** HRMS spectrum of 5NPO in positive mode.

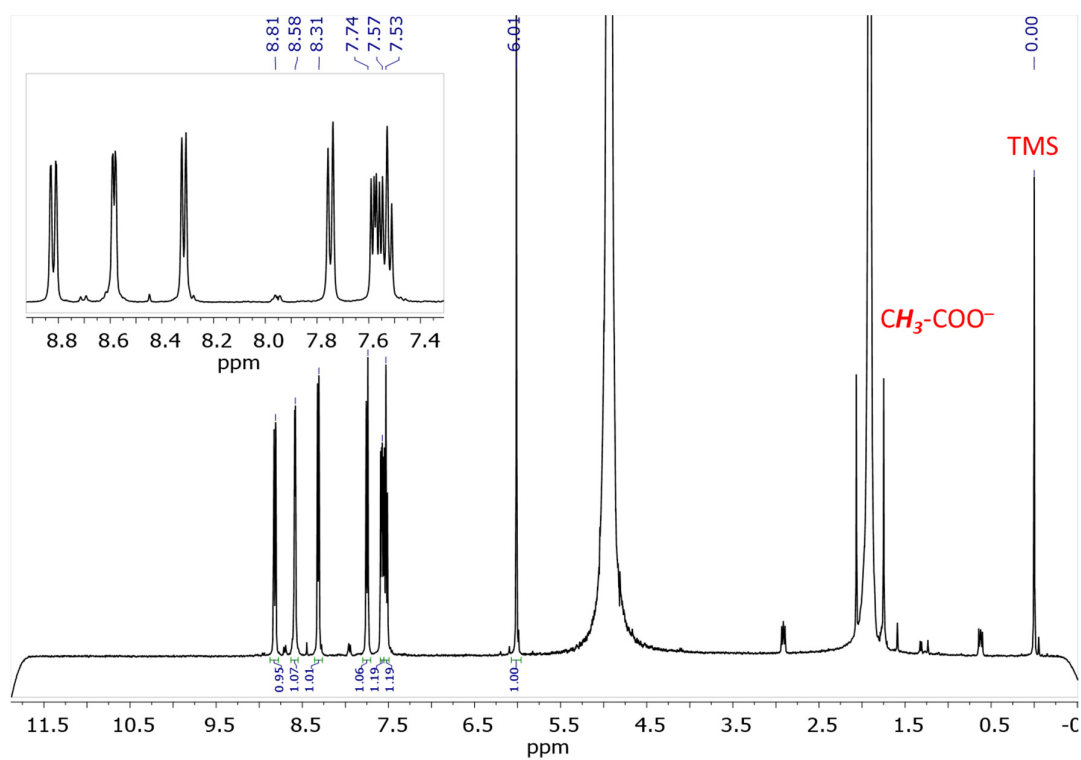

**Figure S54.** <sup>1</sup>H NMR spectrum of 6NPO in D<sub>2</sub>O (400 MHz, 25 °C). Inset: Selected region of the aromatic part.

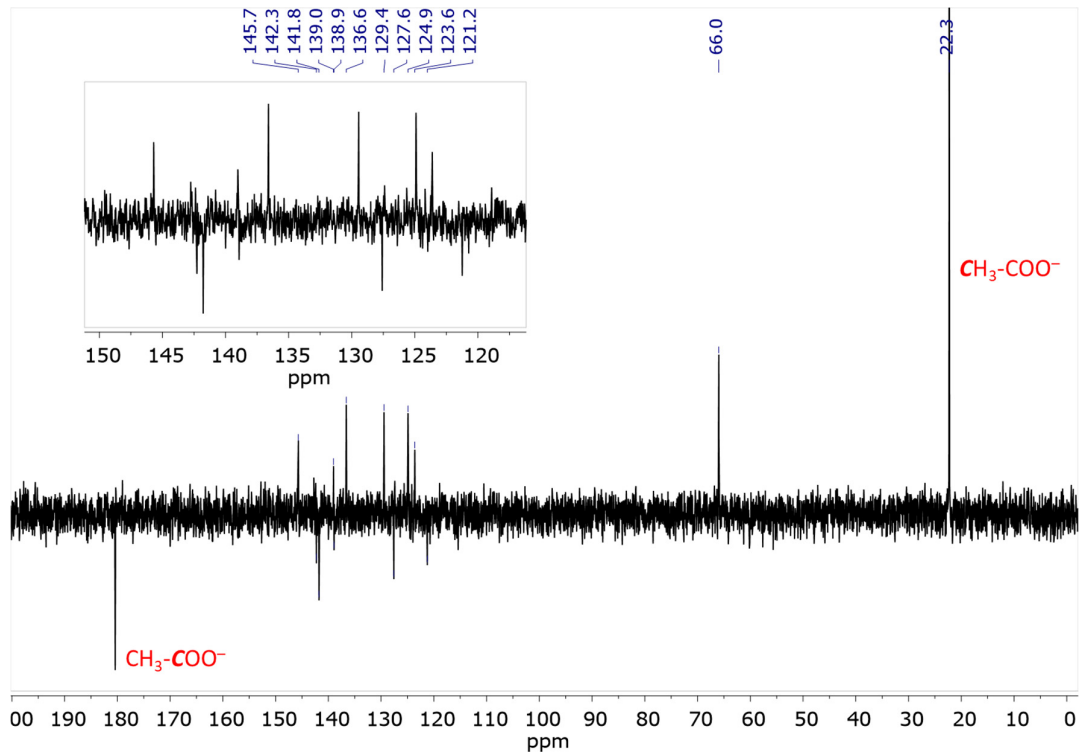

**Figure S55.** APT <sup>13</sup>C NMR spectrum of 6NPO in D<sub>2</sub>O (100.6 MHz, 25 °C). Inset: Selected region of the aromatic part.

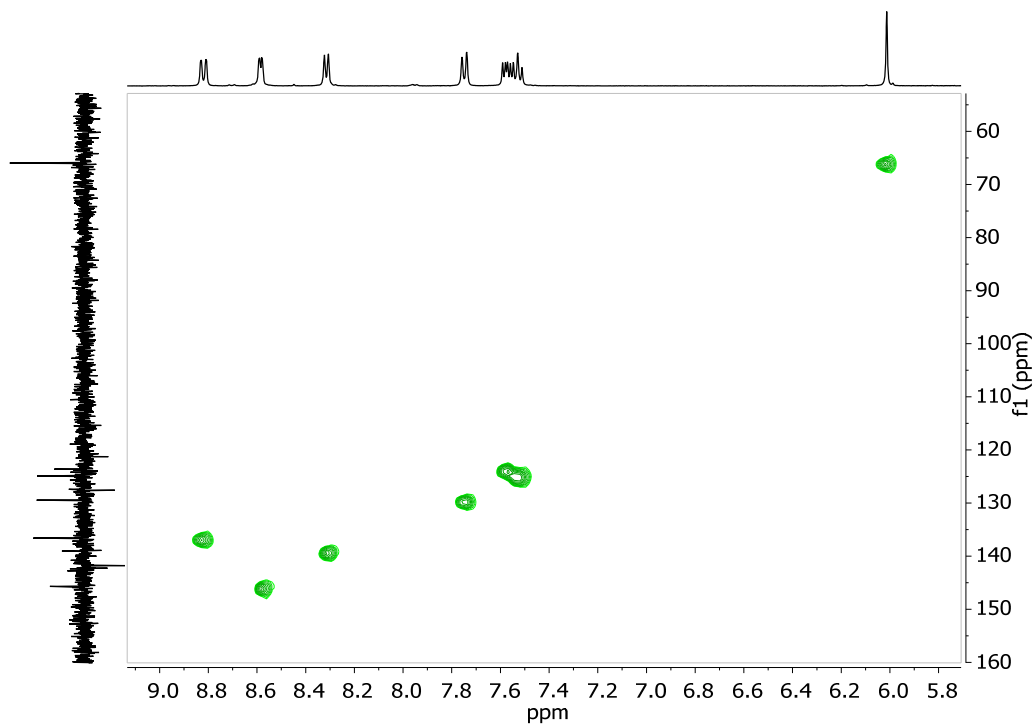

Figure S56. ( $^1\text{H}$ - $^{13}\text{C}$ ) HSQC NMR spectrum of 6NPO in  $\text{D}_2\text{O}$  (400 MHz, 25  $^\circ\text{C}$ ).

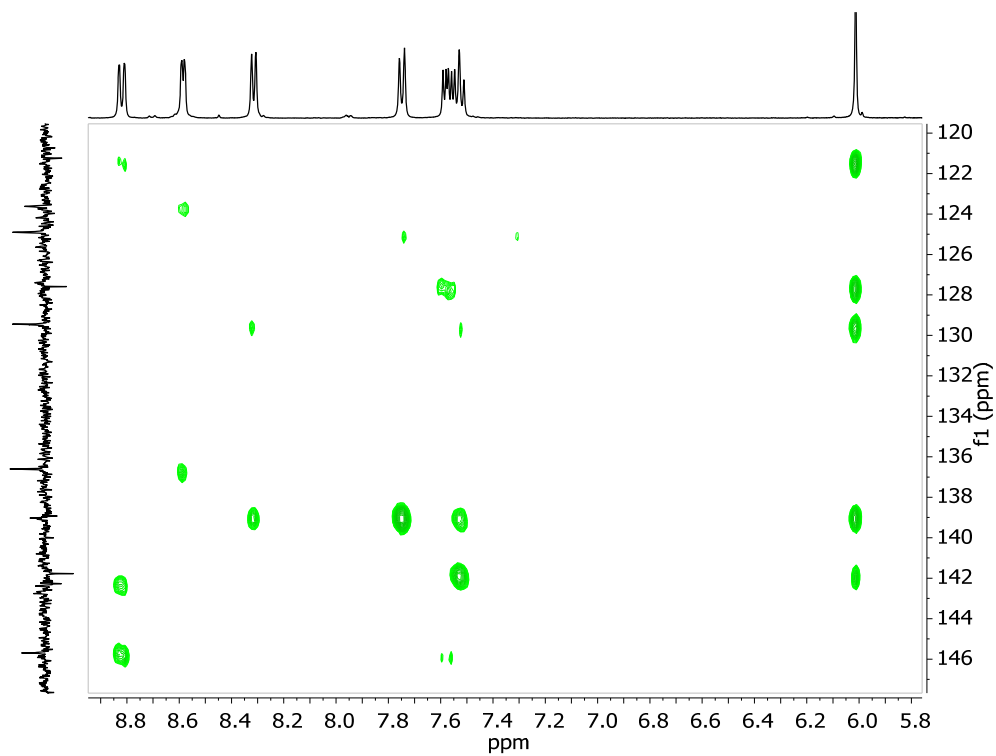

Figure S57. ( $^1\text{H}$ - $^{13}\text{C}$ ) HMBC NMR spectrum of 6NPO in  $\text{D}_2\text{O}$  (400 MHz, 25  $^\circ\text{C}$ ).

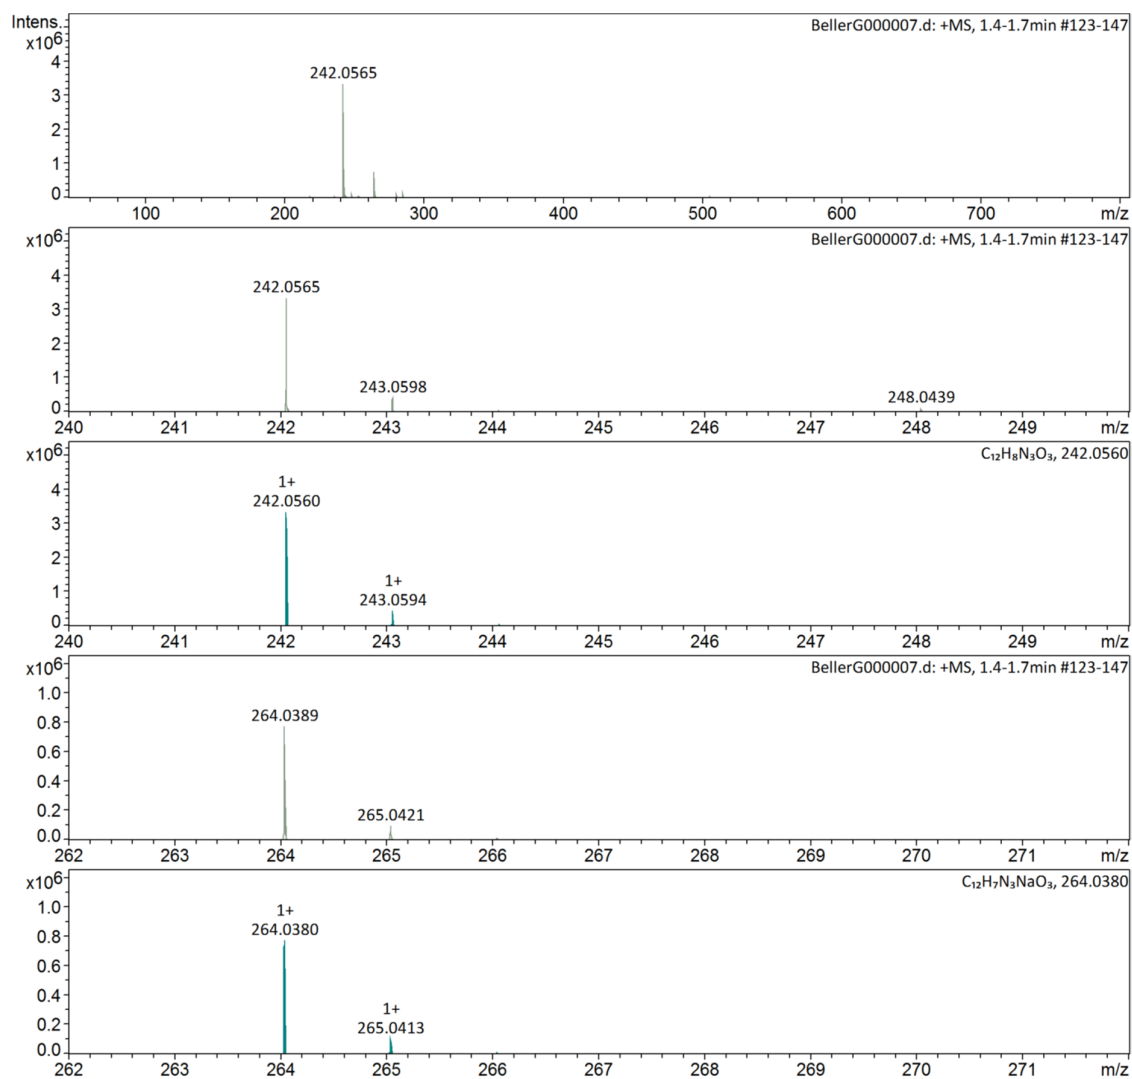

**Figure S58.** HRMS spectrum of 6NPO in positive mode.

## The acid dissociation constants of substituted mono-*N*-oxide derivatives

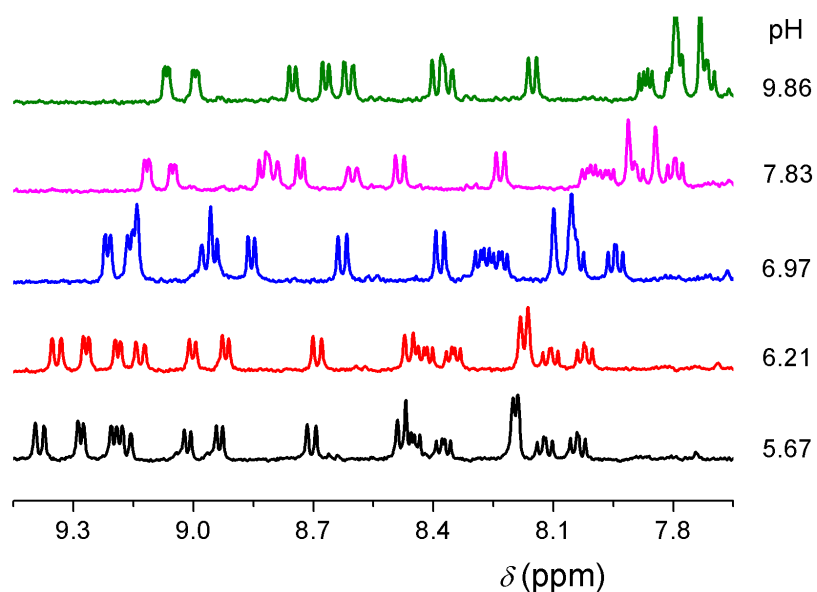

**Figure S59.** The pH dependence of the aromatic region of the  $^1\text{H}$ -NMR spectra of 5MPO and 6MPO in  $\text{H}_2\text{O}$  at 400 MHz.  $[\text{5MPO}+\text{6MPO}]_{\text{tot}} = 8.1 \text{ mM}$ ,  $I = 0.10 \text{ M}$ ;  $T = 25.0 \text{ }^\circ\text{C}$ . Only 50% of the total number of spectra are shown for clarity.

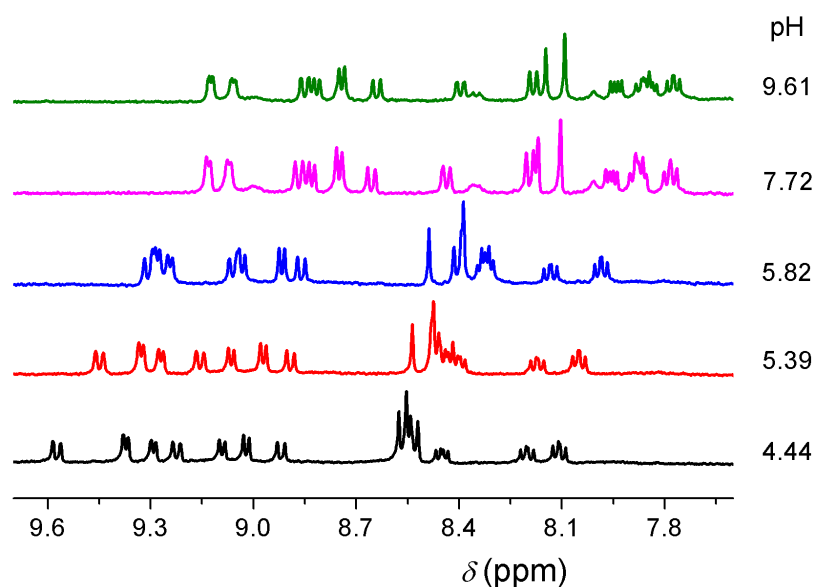

**Figure S60.** The pH dependence of the  $^1\text{H}$ -NMR spectra of 5CPO and 6CPO in  $\text{H}_2\text{O}$  at 400 MHz.  $[\text{5CPO}+\text{6CPO}]_{\text{tot}} = 8.0 \text{ mM}$ ,  $I = 0.10 \text{ M}$ ;  $T = 25.0 \text{ }^\circ\text{C}$ . Only 50% of the total number of spectra are shown for clarity.

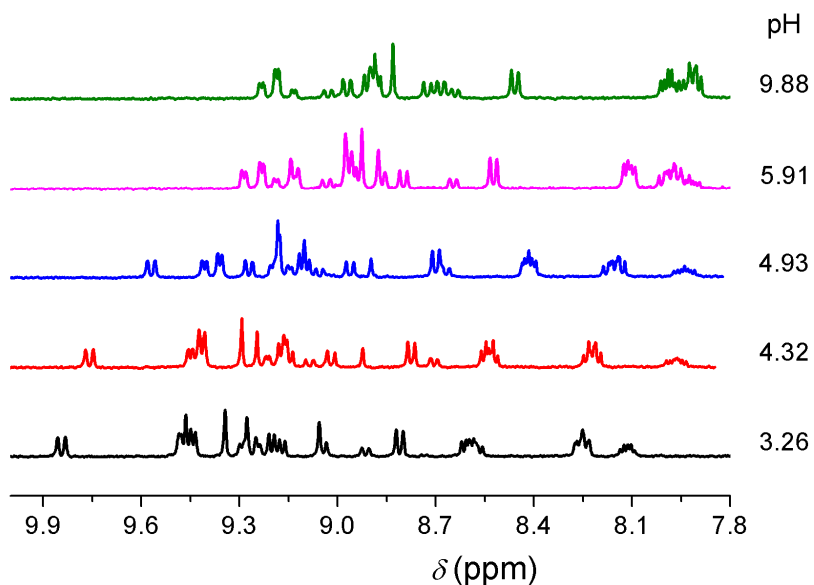

**Figure S61.** The pH dependence of the  $^1\text{H}$ -NMR spectra of 5NPO and 6NPO in  $\text{H}_2\text{O}$  at 400 MHz.  $[\text{5NPO}+\text{6NPO}]_{\text{tot}} = 8.2 \text{ mM}$ ,  $I = 0.10 \text{ M}$ ;  $T = 25.0 \text{ }^\circ\text{C}$ . Only 50% of the total number of spectra are shown for clarity.

#### X-ray structures of 1,10-phenatroline-1-*N*-oxide derivatives

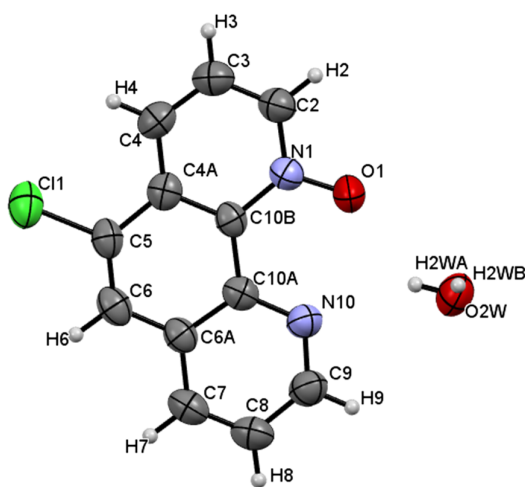

**Figure S62.** The molecular structure of  $5\text{CPO}\cdot\text{H}_2\text{O}$  with displacement ellipsoids drawn at 50% probability level.

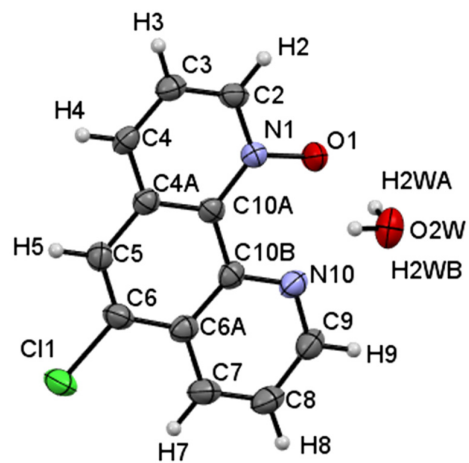

**Figure S63.** The molecular structure of 6CPO·H<sub>2</sub>O with displacement ellipsoids drawn at 50% probability level.

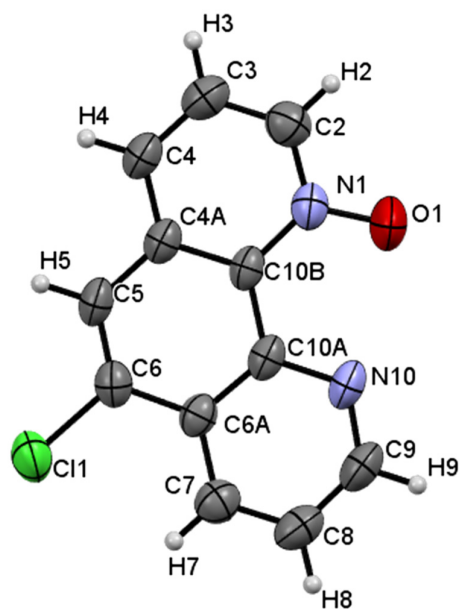

**Figure S64.** The molecular structure of **6CPO** with displacement ellipsoids drawn at 50% probability level.

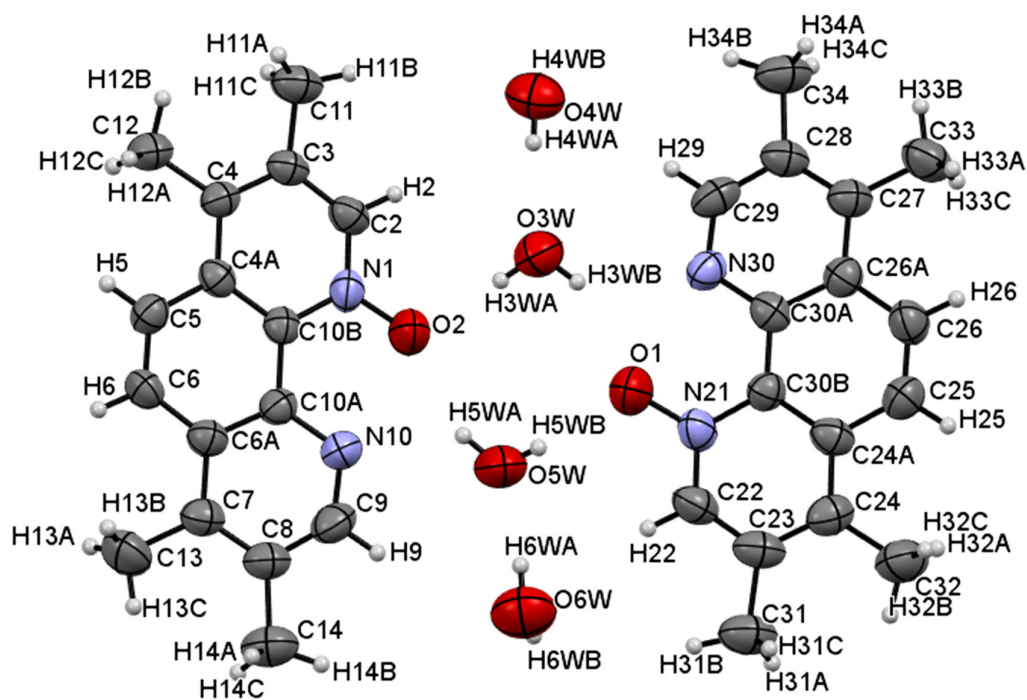

**Figure S65.** The molecular structure of **TMPO** with displacement ellipsoids drawn at 50% probability level.



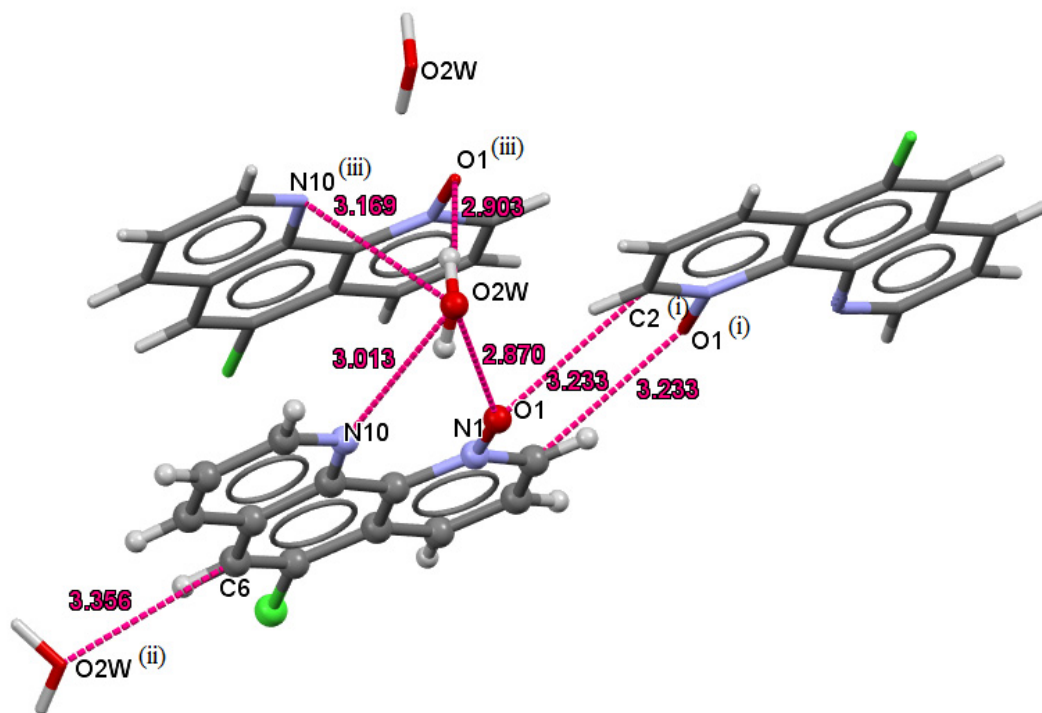

**Figure S66.** Selected hydrogen bonds in **5CPO×H<sub>2</sub>O**. The asymmetric unit is given in ball and sticks, and the symmetry-generated part of the compound is given in capped sticks representation.

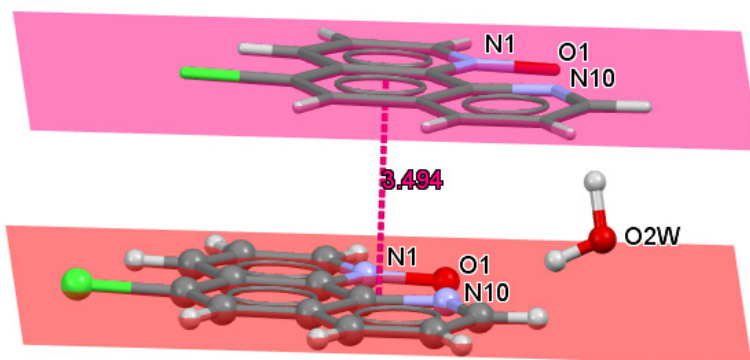

**Figure S67.** Distance between the aromatic rings of **5CPO×H<sub>2</sub>O**.

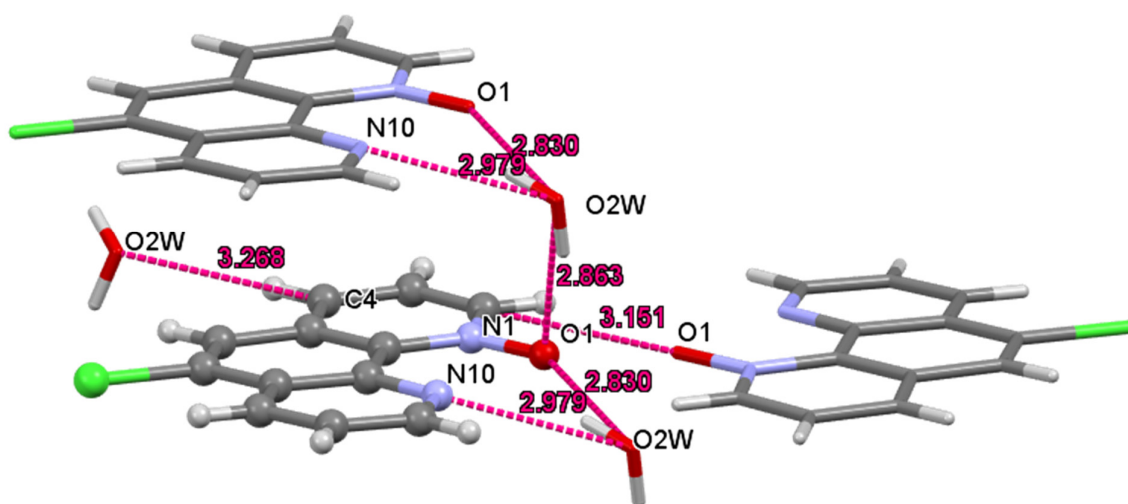

**Figure S68.** Selected hydrogen bonds in **6CPO×H<sub>2</sub>O**.

The asymmetric unit is given in ball and sticks, and the symmetry-generated part of the compound is given in capped sticks representation.

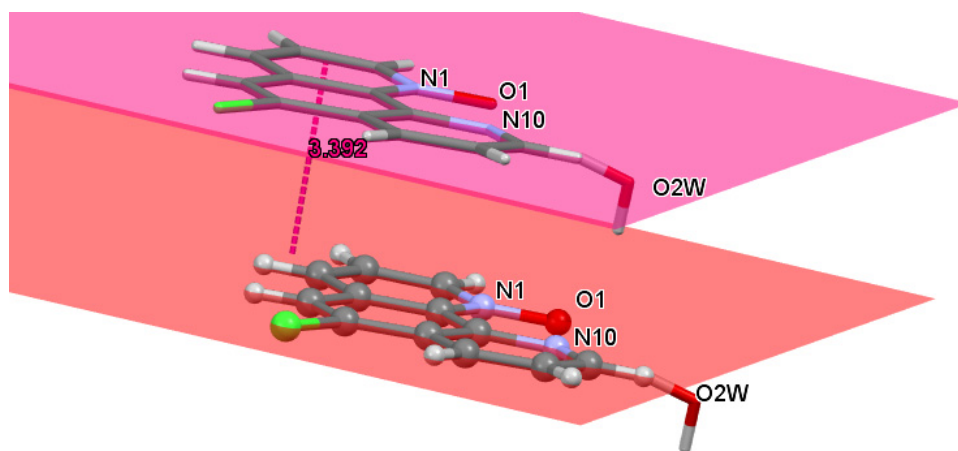

**Figure S69.** Distance between the aromatic rings of **6CPO×H<sub>2</sub>O**.

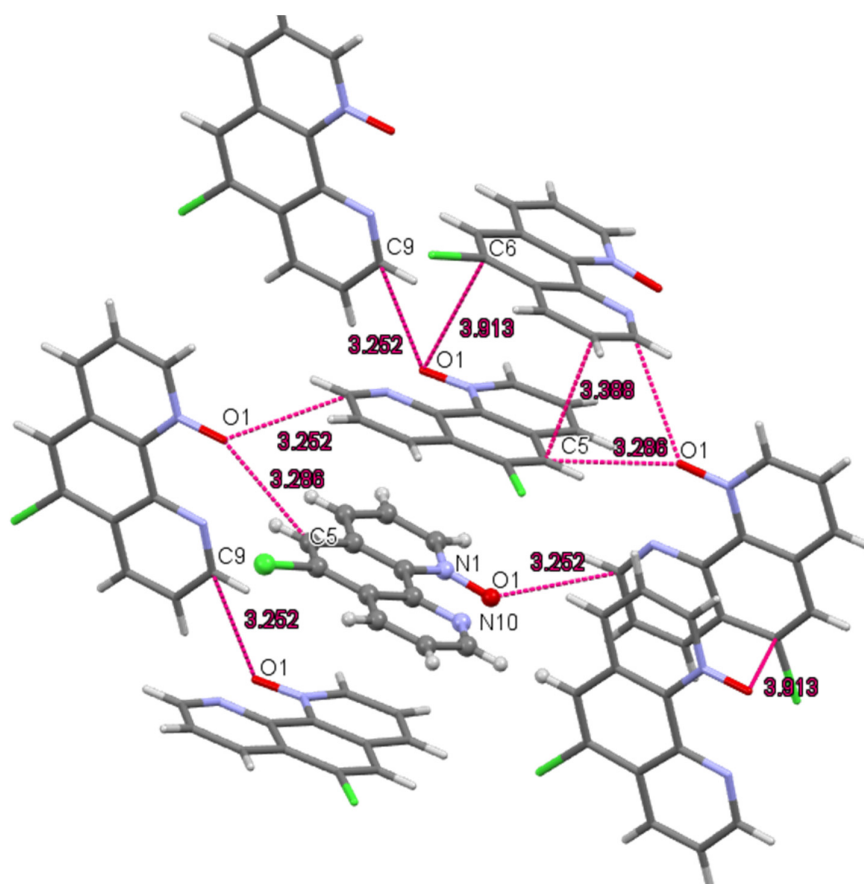

**Figure S70.** Partial packing diagram with selected weak interactions of **6CPO**.

The asymmetric unit of **6CPO** is given in ball and sticks, and the symmetry-generated part of the compound is given in capped sticks representation.

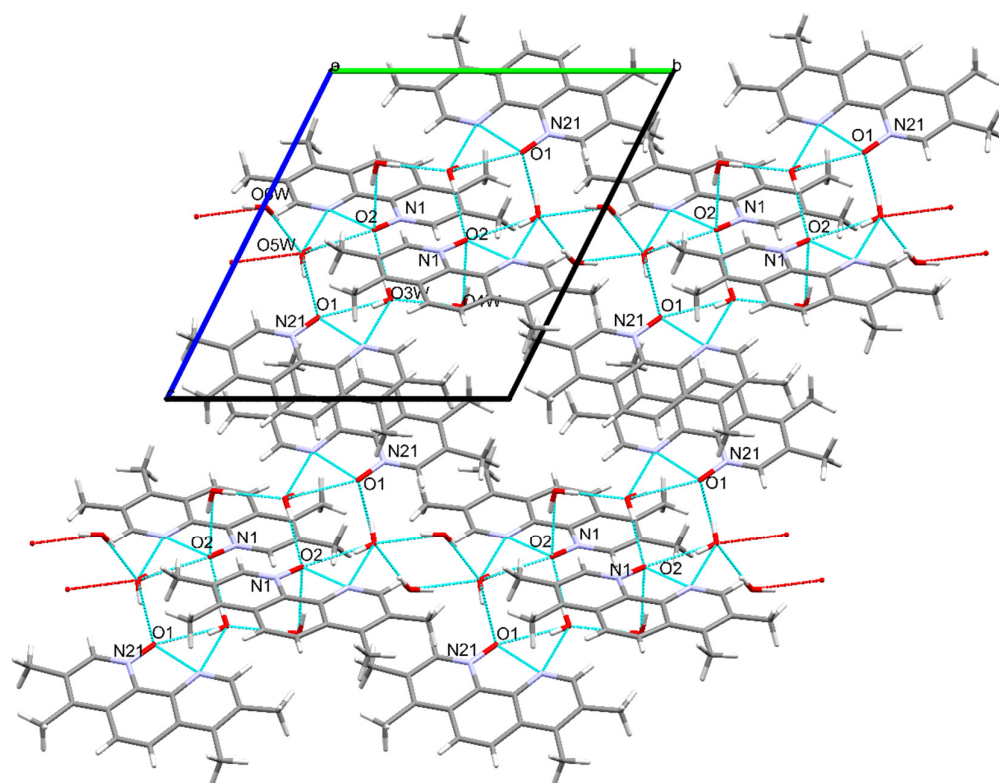

**Figure S71.** Partial packing view of TMPO along axis “a”

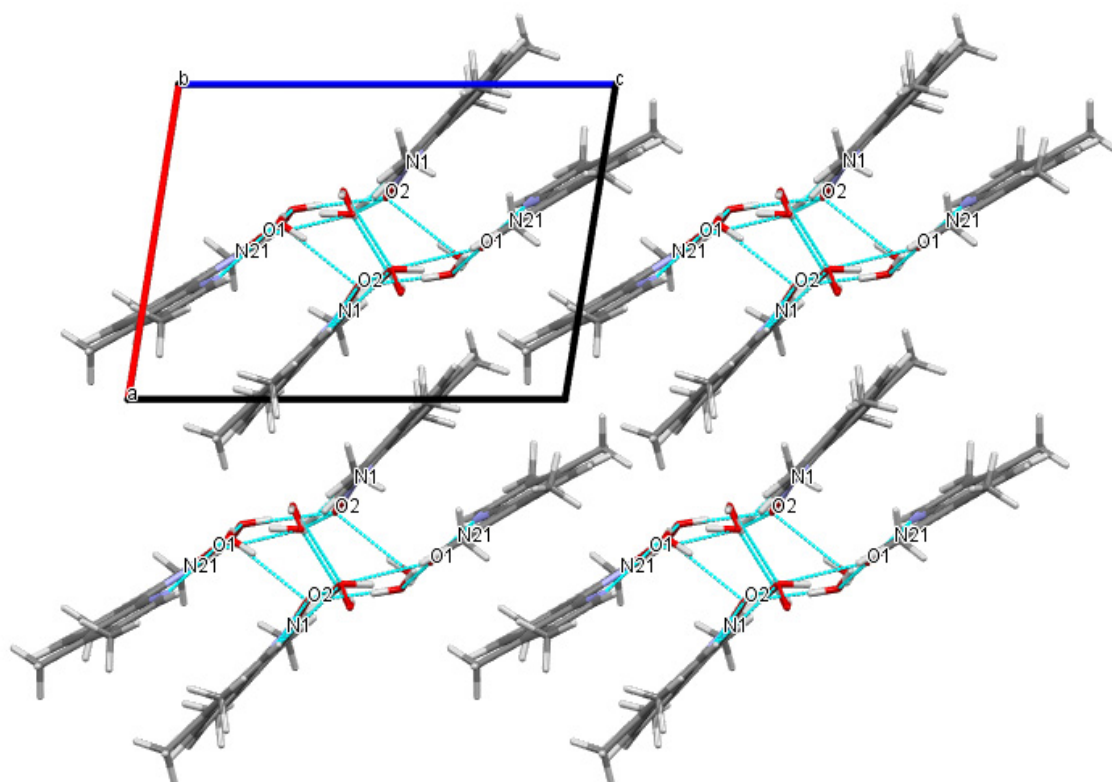

**Figure S72.** Partial packing view of TMPO along axis “b”

**Table S1.** Crystallographic data of 1,10-phenatroline-mono-*N*-oxdides.

| Compound                                                      | 5CPO×H <sub>2</sub> O                                             | 6CPO×H <sub>2</sub> O                                             | 6CPO                                                                | 2×TMPO×4H <sub>2</sub> O                                            |
|---------------------------------------------------------------|-------------------------------------------------------------------|-------------------------------------------------------------------|---------------------------------------------------------------------|---------------------------------------------------------------------|
| Empirical formula                                             | C <sub>12</sub> H <sub>9</sub> ClN <sub>2</sub> O                 | C <sub>12</sub> H <sub>9</sub> ClN <sub>2</sub> O <sub>2</sub>    | C <sub>12</sub> H <sub>7</sub> ClN <sub>2</sub> O                   | C <sub>32</sub> H <sub>40</sub> N <sub>4</sub> O <sub>6</sub>       |
| <i>M</i> (K)                                                  | 248.66                                                            | 248.66                                                            | 230.65                                                              | 576.31                                                              |
| <i>T</i>                                                      | 298(2)                                                            | 100(2)                                                            | 298(2)                                                              | 299.12                                                              |
| Crystal system                                                | monoclinic                                                        | Monoclinic                                                        | orthorhombic                                                        | triclinic                                                           |
| Space group                                                   | <i>P</i> 2 <sub>1</sub> / <i>c</i>                                | <i>P</i> 2 <sub>1</sub> / <i>c</i>                                | Pbca                                                                | P-1                                                                 |
| Crystal colour, habit                                         | colourless, needle                                                | colourless, needle                                                | colourless, needle                                                  | colourless, block                                                   |
| <i>a</i> [Å]                                                  | 3.8520(5)                                                         | 17.7612(15)                                                       | 14.2028(7)                                                          | 9.1842(6)                                                           |
| <i>b</i> [Å]                                                  | 20.096(2)                                                         | 3.8411(4)                                                         | 8.7203(4)                                                           | 12.9797(9)                                                          |
| <i>c</i> [Å]                                                  | 14.0112(18)                                                       | 16.1120(14)                                                       | 15.5475(7)                                                          | 13.8860(9)                                                          |
| $\alpha$ [°]                                                  | 90                                                                | 90                                                                | 90                                                                  | 115.642(4)                                                          |
| $\beta$ [°]                                                   | 95.414(4)                                                         | 109.656(3)                                                        |                                                                     | 95.436(4)                                                           |
| $\gamma$ [°]                                                  | 90                                                                | 90                                                                |                                                                     | 96.332(4)                                                           |
| <i>V</i> [Å <sup>3</sup> ]                                    | 1079.7(2)                                                         | 1035.15(17)                                                       | 1925.60(16)                                                         | 1464.33(18)                                                         |
| <i>Z</i>                                                      | 4                                                                 | 4                                                                 | 8                                                                   | 2                                                                   |
| <i>D</i> <sub>calcd</sub> [g cm <sup>-3</sup> ]               | 1.530                                                             | 1.596                                                             | 1.591                                                               | 1.307                                                               |
| $\mu$ (mm <sup>-1</sup> )                                     | 0.343                                                             | 0.358                                                             | 0.371                                                               | 0.091                                                               |
| <i>F</i> (000)                                                | 512.0                                                             | 512.0                                                             | 944.0                                                               | 614.0                                                               |
| Crystal size/mm <sup>3</sup>                                  | 0.304 × 0.118 × 0.081                                             | 0.372 × 0.072 × 0.046                                             | 0.376 × 0.103 × 0.061                                               | 0.252 × 0.081 × 0.51                                                |
| Radiation, $\lambda$ [Å]                                      | MoK $\alpha$ ( $\lambda$ = 0.71073)                               | MoK $\alpha$ ( $\lambda$ = 0.71073)                               | MoK $\alpha$ ( $\lambda$ = 0.71073)                                 | MoK $\alpha$ ( $\lambda$ = 0.71073)                                 |
| 2 $\theta$ -Range [°]                                         | 6.748 to 51.762                                                   | 5.914 to 52.286                                                   | 5.974 to 52.136                                                     | 5.246 to 50.802                                                     |
| Index ranges                                                  | -4 ≤ <i>h</i> ≤ 4,<br>-24 ≤ <i>k</i> ≤ 24,<br>-17 ≤ <i>l</i> ≤ 16 | -21 ≤ <i>h</i> ≤ 21,<br>-4 ≤ <i>k</i> ≤ 4,<br>-19 ≤ <i>l</i> ≤ 19 | -17 ≤ <i>h</i> ≤ 17,<br>-10 ≤ <i>k</i> ≤ 10,<br>-19 ≤ <i>l</i> ≤ 19 | -11 ≤ <i>h</i> ≤ 11,<br>-15 ≤ <i>k</i> ≤ 15,<br>-16 ≤ <i>l</i> ≤ 16 |
| Number of reflections collected                               | 19759                                                             | 17581                                                             | 49701                                                               | 33460                                                               |
| Number of independent reflections ( <i>R</i> <sub>int</sub> ) | 2075 [ <i>R</i> <sub>int</sub> = 0.1383]                          | 2048 [ <i>R</i> <sub>int</sub> = 0.0954]                          | 1902 [ <i>R</i> <sub>int</sub> = 0.1333]                            | 5382 [ <i>R</i> <sub>int</sub> = 0.1798]                            |
| Data/restraints/parameters                                    | 2075/0/163                                                        | 2048/0/157                                                        | 1902/0/145                                                          | 5382/0/399                                                          |
| Goodness-of-fit on <i>F</i> <sup>2</sup>                      | 1.011                                                             | 1.060                                                             | 1.038                                                               | 1.019                                                               |

|                                                |                                  |                                  |                                  |                                  |
|------------------------------------------------|----------------------------------|----------------------------------|----------------------------------|----------------------------------|
| Final R indexes [ $I \geq 2\sigma(I)$ ]        | $R_1 = 0.0526$ , $wR_2 = 0.1110$ | $R_1 = 0.0444$ , $wR_2 = 0.1081$ | $R_1 = 0.0453$ , $wR_2 = 0.1116$ | $R_1 = 0.0913$ , $wR_2 = 0.2222$ |
| Final R indexes [all data]                     | $R_1 = 0.1258$ , $wR_2 = 0.1484$ | $R_1 = 0.0562$ , $wR_2 = 0.1174$ | $R_1 = 0.0709$ , $wR_2 = 0.1315$ | $R_1 = 0.2248$ , $wR_2 = 0.3092$ |
| Largest diff. peak/hole / $e \text{ \AA}^{-3}$ | 0.23/-0.25                       | 0.39/-0.33                       | 0.22/-0.21                       | 0.54/-0.28                       |
| CCDC-number                                    | 2075043                          | 2075045                          | 2075044                          | 2075046                          |

**Table S2.** Bond lengths(Å) for 5CPO×H<sub>2</sub>O.

| Atom | Atom | Length   | Atom | Atom | Length   |
|------|------|----------|------|------|----------|
| Cl1  | C5   | 1.738(4) | C10B | C4A  | 1.420(5) |
| O1   | N1   | 1.294(4) | C10A | C6A  | 1.419(5) |
| N1   | C2   | 1.346(4) | C6A  | C7   | 1.411(5) |
| N1   | C10B | 1.398(4) | C6A  | C6   | 1.418(5) |
| N10  | C10A | 1.359(4) | C7   | C8   | 1.356(5) |
| N10  | C9   | 1.315(4) | C8   | C9   | 1.388(5) |
| C3   | C2   | 1.368(5) | C4   | C4A  | 1.400(5) |
| C3   | C4   | 1.363(5) | C4A  | C5   | 1.441(5) |
| C10B | C10A | 1.450(5) | C5   | C6   | 1.336(5) |

**Table S3.** Bond angles(°) for 5CPO×H<sub>2</sub>O.

| Ato<br>m | Ato<br>m | Ato<br>m | Angle    | Ato<br>m | Ato<br>m | Ato<br>m | Angle    |
|----------|----------|----------|----------|----------|----------|----------|----------|
| O1       | N1       | C2       | 116.8(3) | C7       | C6A      | C6       | 120.8(3) |
| O1       | N1       | C10B     | 122.1(3) | C6       | C6A      | C10<br>A | 121.1(3) |
| C2       | N1       | C10B     | 121.1(3) | C8       | C7       | C6A      | 119.5(3) |
| C9       | N10      | C10<br>A | 117.6(3) | C7       | C8       | C9       | 118.1(4) |
| C4       | C3       | C2       | 120.9(4) | C3       | C4       | C4A      | 119.1(4) |
| N1       | C2       | C3       | 121.4(4) | C10B     | C4A      | C5       | 117.4(3) |
| N1       | C10B     | C10<br>A | 121.6(3) | C4       | C4A      | C10B     | 120.3(3) |
| N1       | C10B     | C4A      | 117.3(3) | C4       | C4A      | C5       | 122.3(3) |
| C4A      | C10B     | C10<br>A | 121.1(3) | C4A      | C5       | Cl1      | 118.0(3) |
| N10      | C10<br>A | C10B     | 121.6(3) | C6       | C5       | Cl1      | 119.6(3) |
| N10      | C10<br>A | C6A      | 121.2(3) | C6       | C5       | C4A      | 122.4(3) |
| C6A      | C10<br>A | C10B     | 117.2(3) | C5       | C6       | C6A      | 120.7(3) |
| C7       | C6A      | C10<br>A | 118.1(3) | N10      | C9       | C8       | 125.3(4) |



**Table S4.** Hydrogen bonds (with weak hydrogen bonds) for  
5CPO×H<sub>2</sub>O

| D   | H    | A                    | d(D-H)/Å | d(H-A)/Å | d(D-A)/Å | D-H-A/° |
|-----|------|----------------------|----------|----------|----------|---------|
| C2  | H2   | O1 <sup>(i)</sup>    | 0.93     | 2.37     | 3.233(5) | 154.4   |
| C6  | H6   | O2W <sup>(ii)</sup>  | 0.93     | 2.55     | 3.356(5) | 145.1   |
| C7  | H7   | O2W <sup>(ii)</sup>  | 0.93     | 2.57     | 3.366(5) | 144.0   |
| O2W | H2WA | O1                   | 0.82(5)  | 2.19(5)  | 2.870(4) | 140(5)  |
| O2W | H2WA | N10                  | 0.82(5)  | 2.29(5)  | 3.012(5) | 147(5)  |
| O2W | H2WB | O1 <sup>(iii)</sup>  | 0.93(6)  | 2.00(6)  | 2.903(5) | 164(5)  |
| O2W | H2WB | N10 <sup>(iii)</sup> | 0.93(6)  | 2.59(6)  | 3.169(5) | 121(4)  |

[Symmetry codes: (i): 1-x, 1-y, 1-z; (ii): 1+x, 1/2-y, -1/2+z; (iii): -1+x, +y, +z]

**Table S5.** Bond lengths(Å) for 6CPO×H<sub>2</sub>O.

| Atom | Atom | Length   | Atom | Atom | Length   |
|------|------|----------|------|------|----------|
| Cl1  | C6   | 1.745(2) | C10A | C10B | 1.450(3) |
| O1   | N1   | 1.306(2) | C10B | C6A  | 1.427(3) |
| N1   | C2   | 1.352(3) | C9   | C8   | 1.396(3) |
| N1   | C10A | 1.391(3) | C8   | C7   | 1.370(3) |
| N10  | C9   | 1.320(3) | C4   | C4A  | 1.401(3) |
| N10  | C10B | 1.356(3) | C4A  | C5   | 1.429(3) |
| C3   | C4   | 1.373(3) | C5   | C6   | 1.341(3) |
| C3   | C2   | 1.379(3) | C6   | C6A  | 1.430(3) |
| C10A | C4A  | 1.416(3) | C6A  | C7   | 1.399(3) |

**Table S6.** Bond angles(°) for 6CPO×H<sub>2</sub>O.

| Atom | Atom | Atom | Angle      | Atom | Atom | Atom | Angle      |
|------|------|------|------------|------|------|------|------------|
| O1   | N1   | C2   | 116.96(17) | C7   | C8   | C9   | 118.2(2)   |
| O1   | N1   | C10A | 122.22(17) | C3   | C4   | C4A  | 118.7(2)   |
| C2   | N1   | C10A | 120.81(18) | C4   | C4A  | C10A | 121.32(19) |
| C9   | N10  | C10B | 118.97(19) | C4   | C4A  | C5   | 118.85(19) |
| C4   | C3   | C2   | 119.9(2)   | C10A | C4A  | C5   | 119.83(19) |
| N1   | C2   | C3   | 122.02(19) | C6   | C5   | C4A  | 120.3(2)   |
| N1   | C10A | C4A  | 117.20(18) | C5   | C6   | C6A  | 122.6(2)   |
| N1   | C10A | C10B | 122.96(18) | C5   | C6   | Cl1  | 118.77(17) |
| C4A  | C10A | C10B | 119.84(18) | C6A  | C6   | Cl1  | 118.61(17) |

**Table S6.** Bond angles(°) for 6CPO×H<sub>2</sub>O.

| Atom Atom Atom | Angle      | Atom Atom Atom | Angle      |
|----------------|------------|----------------|------------|
| N10 C10B C6A   | 120.94(19) | C7 C6A C10B    | 117.90(19) |
| N10 C10B C10A  | 120.74(19) | C7 C6A C6      | 123.02(19) |
| C6A C10B C10A  | 118.32(19) | C10B C6A C6    | 119.09(19) |
| N10 C9 C8      | 123.8(2)   | C8 C7 C6A      | 120.1(2)   |

**Table S7.** Hydrogen bonds (with weak hydrogen bonds) for 6CPO×H<sub>2</sub>O

| D   | H    | A                    | d(D-H)/Å | d(H-A)/Å | d(D-A)/Å | D-H-A/° |
|-----|------|----------------------|----------|----------|----------|---------|
| O2W | H2WA | O1 <sup>(i)</sup>    | 0.87     | 2.07     | 2.830(2) | 146.00  |
| O2W | H2WA | N10 <sup>(i)</sup>   | 0.87     | 2.26     | 2.979(3) | 140.00  |
| O2W | H2WB | O1                   | 0.87     | 2.03     | 2.863(2) | 161.00  |
| C2  | H2   | O1 <sup>(ii)</sup>   | 0.95     | 2.26     | 3.151(3) | 155.00  |
| C4  | H4   | O2W <sup>(iii)</sup> | 0.95     | 2.40     | 3.267(3) | 152.00  |
| C5  | H5   | O2W <sup>(iii)</sup> | 0.95     | 2.55     | 3.375(3) | 146.00  |

[Symmetry codes: (i): x,-1+y,z, (ii) 1-x,1-y,1-z, (iii): x,-1/2-y,-1/2+z]

**Table S8.** Bond lengths(Å) for 6CPO.

| Atom Atom | Length   | Atom Atom | Length   |
|-----------|----------|-----------|----------|
| Cl1 C6    | 1.740(2) | C10A C10B | 1.454(3) |
| N1 O1     | 1.284(3) | C6 C5     | 1.334(3) |
| N1 C2     | 1.352(3) | C10B C4A  | 1.408(3) |
| N1 C10B   | 1.394(3) | C5 C4A    | 1.426(3) |
| N10 C9    | 1.322(3) | C4A C4    | 1.395(3) |
| N10 C10A  | 1.352(3) | C4 C3     | 1.359(4) |
| C6A C7    | 1.403(3) | C9 C8     | 1.385(4) |
| C6A C10A  | 1.419(3) | C7 C8     | 1.358(4) |
| C6A C6    | 1.433(3) | C2 C3     | 1.381(4) |

**Table S9.** Bond angles(°) for **6CPO**.

| Atom | Atom | Atom | Angle      | Atom | Atom | Atom | Angle    |
|------|------|------|------------|------|------|------|----------|
| O1   | N1   | C2   | 116.9(2)   | N1   | C10B | C4A  | 117.8(2) |
| O1   | N1   | C10B | 123.4(2)   | N1   | C10B | C10A | 122.4(2) |
| C2   | N1   | C10B | 119.7(2)   | C4A  | C10B | C10A | 119.8(2) |
| C9   | N10  | C10A | 118.2(2)   | C6   | C5   | C4A  | 120.6(2) |
| C7   | C6A  | C10A | 117.8(2)   | C4   | C4A  | C10B | 121.0(2) |
| C7   | C6A  | C6   | 122.6(2)   | C4   | C4A  | C5   | 119.0(2) |
| C10A | C6A  | C6   | 119.6(2)   | C10B | C4A  | C5   | 120.0(2) |
| N10  | C10A | C6A  | 121.3(2)   | C3   | C4   | C4A  | 119.4(2) |
| N10  | C10A | C10B | 120.6(2)   | N10  | C9   | C8   | 124.5(3) |
| C6A  | C10A | C10B | 118.0(2)   | C8   | C7   | C6A  | 120.0(3) |
| C5   | C6   | C6A  | 122.1(2)   | N1   | C2   | C3   | 122.5(3) |
| C5   | C6   | Cl1  | 119.70(19) | C7   | C8   | C9   | 118.2(3) |
| C6A  | C6   | Cl1  | 118.23(19) | C4   | C3   | C2   | 119.5(3) |

**Table S10.** Hydrogen bonds (with weak hydrogen bonds) for **6CPO**

| D  | H  | A                 | d(D-H)/Å | d(H-A)/Å | d(D-A)/Å | D-H-A/° |
|----|----|-------------------|----------|----------|----------|---------|
| C5 | H5 | O1 <sup>(i)</sup> | 0.93     | 2.45     | 3.286(2) | 149.00  |

[Symmetry codes: (i): 1/2+x,y,3/2-z]

## DFT and TD-DFT calculations

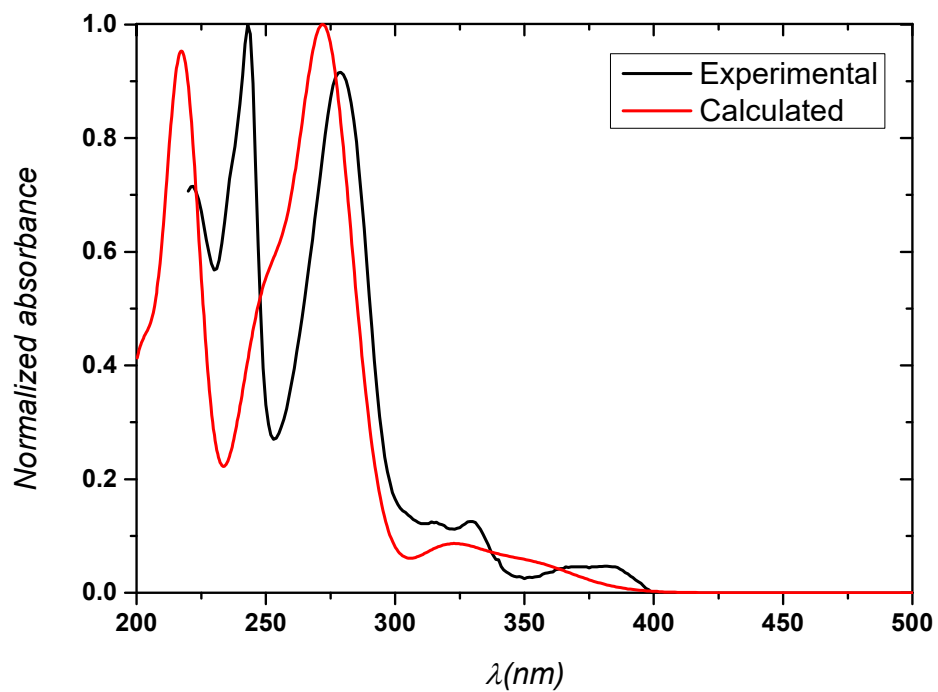

**Figure S73.** Experimental and calculated UV-VIS spectra of 5CPO using TD-DFT/TPSSH/ *def2*-TZVP level of theory. The presence of water was taken into account due to the PCM model.

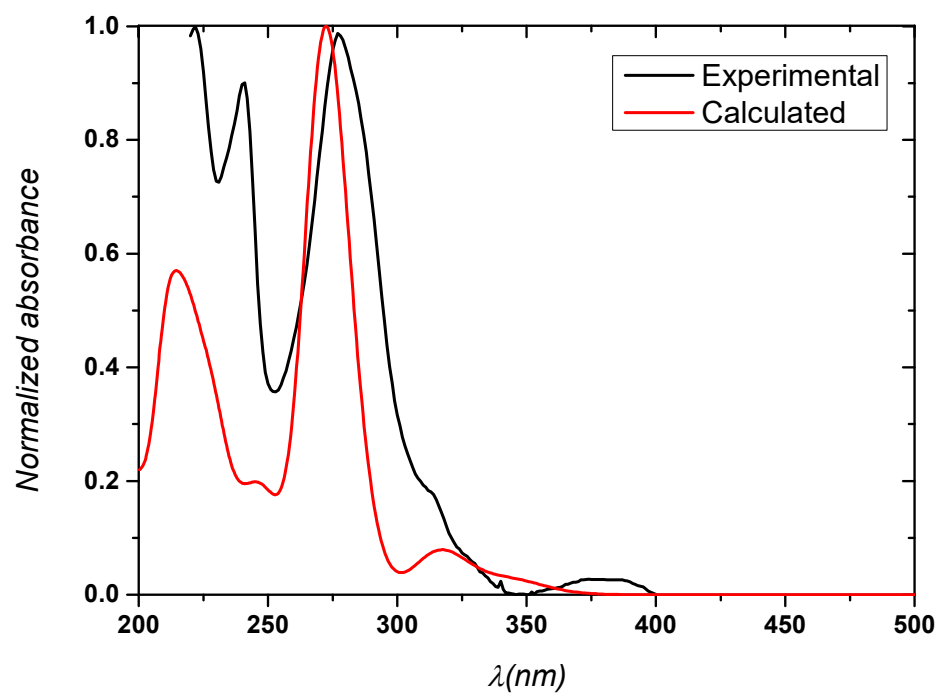

**Figure S74.** Experimental and calculated UV-VIS spectra of 6CPO using TD-DFT/TPSSH/ *def2*-TZVP level of theory. The presence of water was taken into account due to the PCM model.

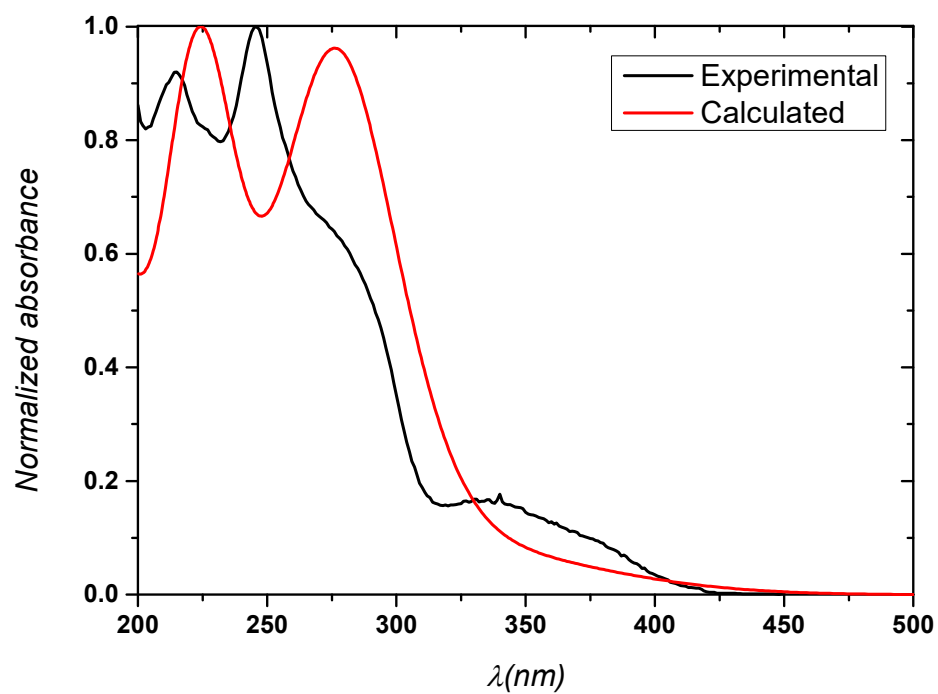

**Figure S75.** Experimental and calculated UV-VIS spectra of 5MPO using TD-DFT/TPSSH/ *def2*-TZVP level of theory. The presence of water was taken into account due to the PCM model.

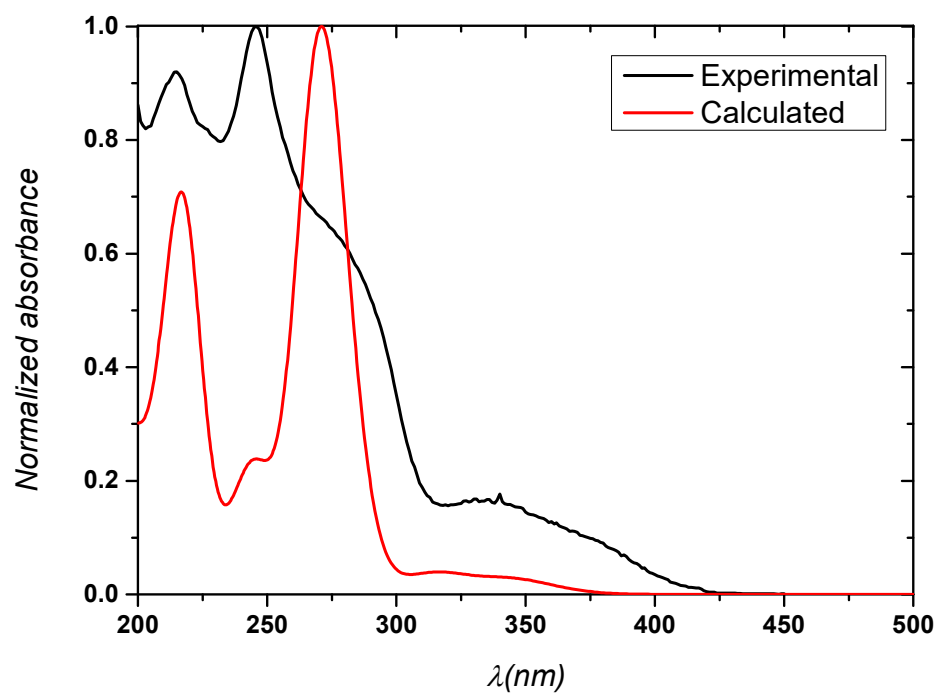

**Figure S76.** Experimental and calculated UV-VIS spectra of 6MPO using TD-DFT/TPSSH/ *def2*-TZVP level of theory. The presence of water was taken into account due to the PCM model.

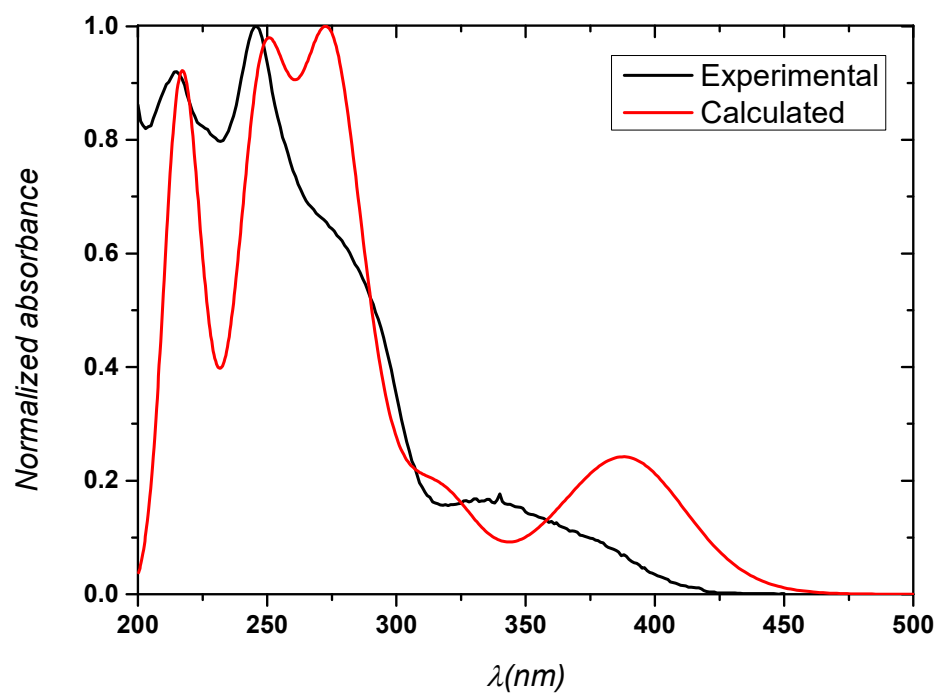

**Figure S77.** Experimental and calculated UV-VIS spectra of 5NPO using TD-DFT/TPSSh/ *def2*-TZVP level of theory. The presence of water was taken into account due to the PCM model.



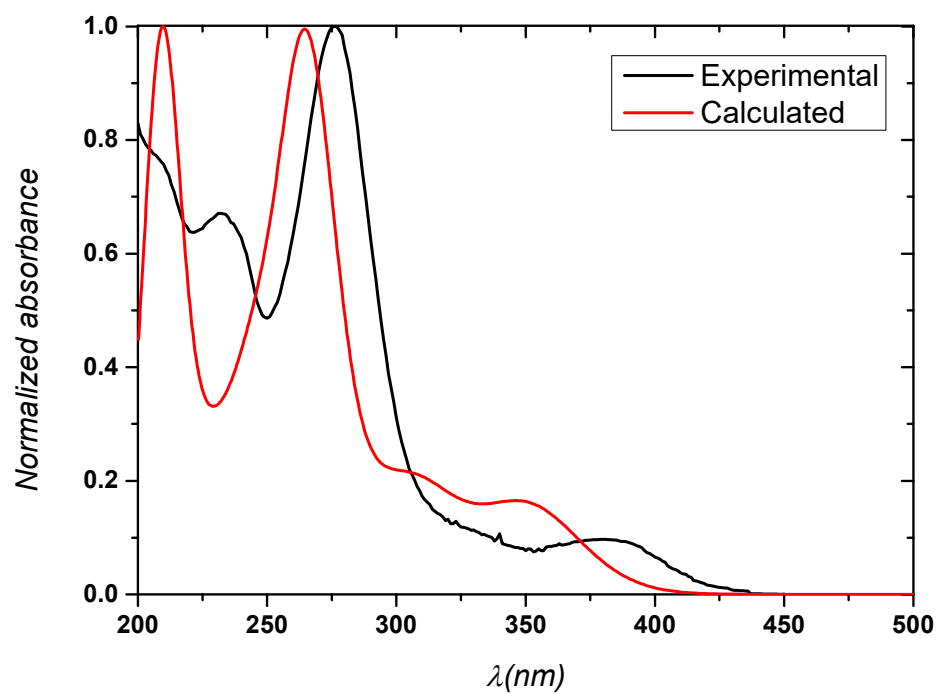

**Figure S78.** Experimental and calculated UV-VIS spectra of 6NPO using TD-DFT/TPSSh/ *def2*-TZVP level of theory. The presence of water was taken into account due to the PCM model.

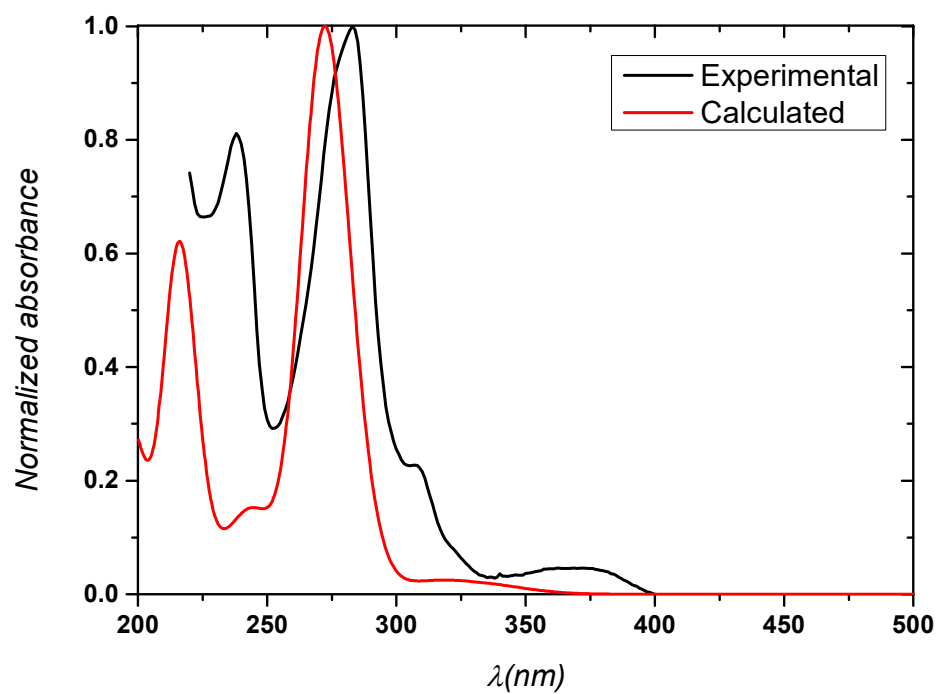

**Figure S79.** Experimental and calculated UV-VIS spectra of DMPO using TD-DFT/TPSSh/ *def2*-TZVP level of theory. The presence of water was taken into account due to the PCM model.

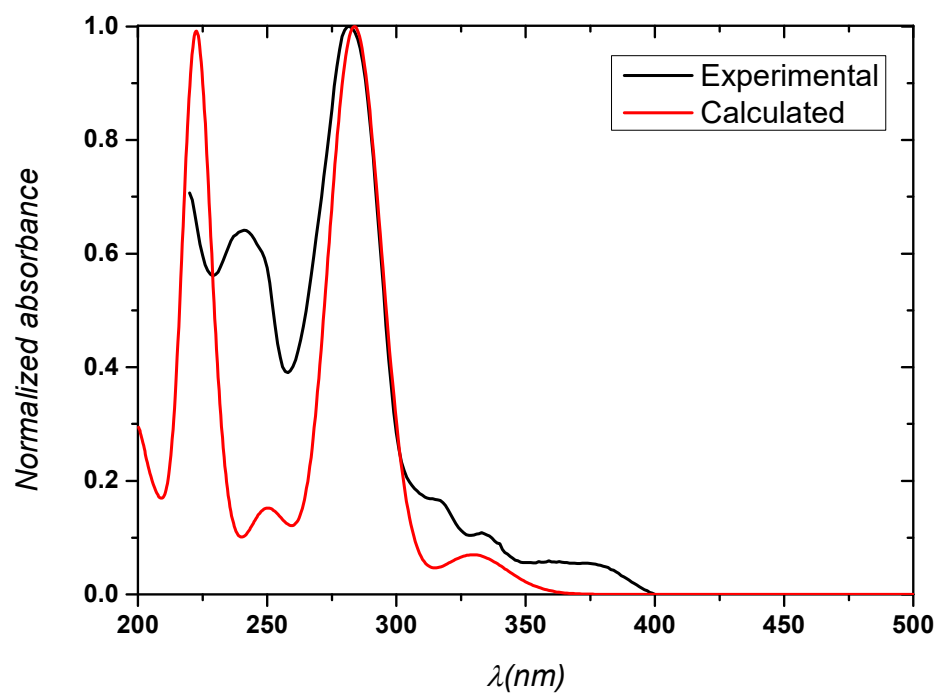

**Figure S80.** Experimental and calculated UV-VIS spectra of TMPO using TD-DFT/TPSSH/ *def2*-TZVP level of theory. The presence of water was taken into account due to the PCM model.

**Table S11.** Computed total energies, number of imaginary frequencies and Cartesian coordinates of phenO at B3P86 *def2*-TZVP level of theory.

|                                                  |               |
|--------------------------------------------------|---------------|
| Electronic Energy (Eh)                           | -649.31024044 |
| Sum of electronic and zero-point Energies (Eh)   | -649.123705   |
| Sum of electronic and thermal Energies (Eh)      | -649.113654   |
| Sum of electronic and enthalpy Energies (Eh)     | -649.112709   |
| Sum of electronic and thermal Free Energies (Eh) | -649.159405   |
| Number of Imaginary Frequencies                  | 0             |

### Molecular Geometry in Cartesian Coordinates

|   |           |           |           |
|---|-----------|-----------|-----------|
| C | -3.501112 | -0.362585 | -0.000476 |
| C | -2.932999 | 0.886720  | -0.000067 |
| C | -1.535657 | 1.018140  | 0.000246  |
| C | -0.781760 | -0.169136 | 0.000270  |
| C | -2.673320 | -1.486402 | -0.000455 |
| C | -0.873112 | 2.278815  | 0.000300  |
| C | 0.643512  | -0.082860 | 0.000336  |
| C | 1.280297  | 1.171840  | 0.000106  |
| C | 0.477979  | 2.350207  | 0.000182  |
| C | 2.680000  | 1.223920  | -0.000314 |
| H | 3.173432  | 2.186884  | -0.000458 |
| C | 3.407400  | 0.059677  | -0.000597 |
| C | 2.750971  | -1.158140 | -0.000269 |
| H | -1.476980 | 3.177482  | 0.000345  |
| H | -4.574518 | -0.491353 | -0.000759 |
| H | -3.547267 | 1.778740  | -0.000044 |
| H | -3.084921 | -2.487703 | -0.000744 |
| H | 0.987224  | 3.305094  | 0.000088  |
| H | 4.487699  | 0.062464  | -0.001061 |
| H | 3.247198  | -2.117296 | -0.000393 |
| N | -1.359051 | -1.387799 | -0.000016 |
| N | 1.422946  | -1.204007 | 0.000276  |
| O | 0.860583  | -2.427426 | 0.000696  |
| H | -0.196986 | -2.233431 | 0.000074  |

**Table S12.** Computed total energies, number of imaginary frequencies and Cartesian coordinates of DMPO at B3P86 *def2*-TZVP level of theory.

|                                                  |                |
|--------------------------------------------------|----------------|
| Electronic Energy (Eh)                           | -725.902894207 |
| Sum of electronic and zero-point Energies (Eh)   | -725.659681    |
| Sum of electronic and thermal Energies (Eh)      | -725.646149    |
| Sum of electronic and enthalpy Energies (Eh)     | -725.645205    |
| Sum of electronic and thermal Free Energies (Eh) | -725.700065    |
| Number of Imaginary Frequencies                  | 0              |
| Mean of alpha and beta Electrons                 | 59             |

#### Molecular Geometry in Cartesian Coordinates

|   |           |           |           |
|---|-----------|-----------|-----------|
| C | -3.517638 | 0.090786  | 0.000195  |
| C | -2.926295 | 1.322619  | 0.000082  |
| C | -1.524386 | 1.429964  | -0.000006 |
| C | -0.800798 | 0.231292  | 0.000026  |
| C | -2.721475 | -1.067757 | 0.000223  |
| C | -0.842495 | 2.683067  | -0.000111 |
| C | 0.633270  | 0.290398  | -0.000053 |
| C | 1.281744  | 1.528778  | -0.000162 |
| C | 0.505706  | 2.728628  | -0.000187 |
| C | 2.685155  | 1.555667  | -0.000240 |
| H | 3.194981  | 2.509919  | -0.000332 |
| C | 3.391540  | 0.388273  | -0.000194 |
| C | 2.735717  | -0.843399 | -0.000075 |
| H | -4.594096 | -0.009821 | 0.000272  |
| H | -3.523954 | 2.225745  | 0.000067  |
| H | 4.471793  | 0.383815  | -0.000245 |
| N | -1.405474 | -0.974357 | 0.000146  |
| N | 1.401129  | -0.846723 | -0.000023 |
| O | 0.812931  | -2.063752 | 0.000037  |
| H | -0.214451 | -1.866291 | 0.000028  |
| H | 1.035879  | 3.671713  | -0.000262 |
| H | -1.431051 | 3.591491  | -0.000120 |
| C | 3.442342  | -2.146471 | -0.000037 |
| H | 3.165925  | -2.729569 | 0.880158  |
| H | 3.165969  | -2.729562 | -0.880258 |
| H | 4.515775  | -1.977032 | -0.000022 |

|   |           |           |           |
|---|-----------|-----------|-----------|
| C | -3.320340 | -2.434034 | 0.000310  |
| H | -2.992838 | -2.987875 | -0.881101 |
| H | -2.992084 | -2.988114 | 0.881283  |
| H | -4.407159 | -2.383699 | 0.000760  |

**Table S13.** Computed total energies, number of imaginary frequencies and Cartesian coordinates of TMPO at B3P86 *def2*-TZVP level of theory.

|                                                  |               |
|--------------------------------------------------|---------------|
| Electronic Energy (Eh)                           | -804.53670418 |
| Sum of electronic and zero-point Energies (Eh)   | -804.237059   |
| Sum of electronic and thermal Energies (Eh)      | -804.220366   |
| Sum of electronic and enthalpy Energies (Eh)     | -804.219422   |
| Sum of electronic and thermal Free Energies (Eh) | -804.280726   |
| Number of Imaginary Frequencies                  | 0             |
| Mean of alpha and beta Electrons                 | 67            |

#### Molecular Geometry in Cartesian Coordinates

|   |           |           |           |
|---|-----------|-----------|-----------|
| C | -3.520540 | -0.492349 | 0.000076  |
| C | -2.908199 | 0.749709  | -0.000082 |
| C | -1.492033 | 0.804666  | -0.000051 |
| C | -0.777079 | -0.398007 | 0.000001  |
| C | -2.706946 | -1.632162 | 0.000185  |
| C | -0.764288 | 2.035511  | -0.000010 |
| C | 0.660984  | -0.366023 | -0.000022 |
| C | 1.356899  | 0.849695  | 0.000033  |
| C | 0.583980  | 2.055135  | 0.000073  |
| C | 2.771925  | 0.869361  | 0.000053  |
| C | 3.454561  | -0.338714 | -0.000036 |
| C | 2.720602  | -1.513570 | -0.000121 |
| N | -1.394197 | -1.595483 | 0.000117  |
| N | 1.396931  | -1.513103 | -0.000080 |
| O | 0.810672  | -2.735255 | -0.000112 |
| H | -0.205451 | -2.533750 | 0.000014  |
| H | 1.102554  | 3.002283  | 0.000165  |
| H | -1.307173 | 2.969785  | 0.000001  |
| H | -3.158656 | -2.617158 | 0.000318  |

|   |           |           |           |
|---|-----------|-----------|-----------|
| H | 3.175669  | -2.493212 | -0.000227 |
| C | -3.700474 | 2.019280  | -0.000261 |
| H | -3.460837 | 2.620343  | 0.879312  |
| H | -3.459824 | 2.620785  | -0.879248 |
| H | -4.770107 | 1.830983  | -0.000931 |
| C | -5.008912 | -0.669454 | 0.000106  |
| H | -5.461039 | -0.208779 | 0.880155  |
| H | -5.460961 | -0.209472 | -0.880355 |
| H | -5.266209 | -1.727785 | 0.000492  |
| C | 4.949919  | -0.442408 | -0.000044 |
| H | 5.261438  | -1.485457 | -0.000161 |
| H | 5.372345  | 0.042609  | -0.881133 |
| H | 5.372284  | 0.042366  | 0.881220  |
| C | 3.500148  | 2.174092  | 0.000167  |
| H | 3.230743  | 2.761952  | -0.879544 |
| H | 3.230533  | 2.761888  | 0.879857  |
| H | 4.576900  | 2.036186  | 0.000292  |

**Table S14.** Computed total energies, number of imaginary frequencies and Cartesian coordinates of 7MPO at B3P86 *def2*-TZVP level of theory.

|                                                  |                |
|--------------------------------------------------|----------------|
| Electronic Energy (Eh)                           | -686.574988522 |
| Sum of electronic and zero-point Energies (Eh)   | -686.358271    |
| Sum of electronic and thermal Energies (Eh)      | -686.346768    |
| Sum of electronic and enthalpy Energies (Eh)     | -686.345824    |
| Sum of electronic and thermal Free Energies (Eh) | -686.395606    |
| Number of Imaginary Frequencies                  | 0              |
| Mean of alpha and beta Electrons                 | 55             |

#### Molecular Geometry in Cartesian Coordinates

|   |           |           |           |
|---|-----------|-----------|-----------|
| C | 3.057030  | 1.128577  | -0.006520 |
| C | 2.765888  | -0.215471 | -0.003080 |
| C | 1.398976  | -0.593916 | -0.001399 |
| C | 0.436345  | 0.425133  | -0.000996 |
| C | 2.031988  | 2.072720  | -0.005011 |
| C | 0.979323  | -1.961040 | -0.000238 |
| C | -0.955473 | 0.066780  | 0.000217  |
| C | -1.341400 | -1.280454 | -0.001413 |
| C | -0.328694 | -2.287673 | -0.001197 |
| C | -2.704948 | -1.606368 | -0.002828 |
| C | -3.645997 | -0.611234 | -0.002049 |

|   |           |           |           |
|---|-----------|-----------|-----------|
| C | -3.234487 | 0.710142  | 0.001102  |
| N | 0.761314  | 1.735456  | -0.001730 |
| N | -1.943770 | 1.012684  | 0.002390  |
| O | -1.648683 | 2.331649  | 0.007864  |
| H | -0.609803 | 2.366510  | 0.003315  |
| H | -0.645583 | -3.322036 | -0.001785 |
| H | 1.729115  | -2.739489 | 0.000599  |
| H | 2.253391  | 3.132516  | -0.006091 |
| H | -3.908838 | 1.553487  | 0.003169  |
| H | 4.084221  | 1.467197  | -0.009367 |
| H | -2.997220 | -2.648068 | -0.004591 |
| H | -4.704707 | -0.822643 | -0.003274 |
| C | 3.853697  | -1.239390 | 0.007962  |
| H | 3.816289  | -1.826944 | 0.927914  |
| H | 3.747118  | -1.935580 | -0.825672 |
| H | 4.829184  | -0.761947 | -0.059051 |

**Table S15.** Computed total energies, number of imaginary frequencies and Cartesian coordinates of 4MPO at B3P86 *def2*-TZVP level of theory.

|                                                  |                |
|--------------------------------------------------|----------------|
| Electronic Energy (Eh)                           | -686.575280874 |
| Sum of electronic and zero-point Energies (Eh)   | -686.358704    |
| Sum of electronic and thermal Energies (Eh)      | -686.347016    |
| Sum of electronic and enthalpy Energies (Eh)     | -686.346072    |
| Sum of electronic and thermal Free Energies (Eh) | -686.396441    |
| Number of Imaginary Frequencies                  | 0              |
| Mean of alpha and beta Electrons                 | 55             |

#### Molecular Geometry in Cartesian Coordinates

|   |           |           |          |
|---|-----------|-----------|----------|
| C | -3.792588 | -0.296722 | 0.000150 |
| C | -2.959141 | -1.382414 | 0.000140 |
| C | -1.566907 | -1.191820 | 0.000101 |



|   |           |           |           |
|---|-----------|-----------|-----------|
| C | -1.096658 | 0.127654  | 0.000063  |
| C | -3.232729 | 0.983785  | 0.000123  |
| C | -0.641217 | -2.277054 | 0.000096  |
| C | 0.322859  | 0.357730  | -0.000007 |
| C | 1.220154  | -0.720475 | -0.000053 |
| C | 0.687601  | -2.049992 | 0.000027  |
| C | 2.616421  | -0.477483 | -0.000171 |
| C | 3.044548  | 0.831155  | -0.000250 |
| C | 2.136055  | 1.869336  | -0.000181 |
| N | -1.933614 | 1.187290  | 0.000078  |
| N | 0.835658  | 1.624905  | -0.000052 |
| O | 0.032570  | 2.715899  | 0.000036  |
| H | -0.925196 | 2.332240  | 0.000037  |
| H | 1.377232  | -2.881728 | 0.000030  |
| H | -1.031335 | -3.286682 | 0.000150  |
| H | -3.861038 | 1.865537  | 0.000138  |
| H | 2.412972  | 2.913058  | -0.000211 |
| H | -4.867148 | -0.411384 | 0.000179  |
| H | 4.097348  | 1.073922  | -0.000368 |
| H | -3.354488 | -2.390331 | 0.000162  |
| C | 3.600450  | -1.599056 | -0.000112 |
| H | 3.463244  | -2.229827 | 0.880155  |
| H | 3.462562  | -2.230741 | -0.879599 |
| H | 4.617887  | -1.214496 | -0.000712 |

**Table S16.** Computed total energies, number of imaginary frequencies and Cartesian coordinates of 5MPO at B3P86 *def2*-TZVP level of theory.

|                                                  |                |
|--------------------------------------------------|----------------|
| Electronic Energy (Eh)                           | -686.573224657 |
| Sum of electronic and zero-point Energies (Eh)   | -686.356294    |
| Sum of electronic and thermal Energies (Eh)      | -686.344778    |
| Sum of electronic and enthalpy Energies (Eh)     | -686.343834    |
| Sum of electronic and thermal Free Energies (Eh) | -686.393574    |
| Number of Imaginary Frequencies                  | 0              |

**Molecular Geometry in Cartesian Coordinates**

|   |           |           |           |
|---|-----------|-----------|-----------|
| C | -3.650961 | 0.139172  | -0.000119 |
| C | -2.826230 | 1.232277  | -0.000148 |
| C | -1.432401 | 1.053805  | -0.000111 |
| C | -0.956665 | -0.261627 | -0.000045 |
| C | -3.083208 | -1.137684 | -0.000054 |
| C | -0.518353 | 2.149203  | -0.000124 |
| C | 0.464276  | -0.469407 | 0.000009  |
| C | 1.348052  | 0.622474  | 0.000012  |
| C | 0.821394  | 1.968489  | -0.000062 |
| C | 2.727541  | 0.369336  | 0.000101  |
| C | 3.198714  | -0.918276 | 0.000202  |
| C | 2.300765  | -1.967239 | 0.000195  |
| N | -1.782057 | -1.329255 | -0.000022 |
| N | 0.996966  | -1.727777 | 0.000089  |
| O | 0.204900  | -2.823469 | 0.000059  |
| H | -0.761231 | -2.450968 | 0.000060  |
| H | -3.704314 | -2.024341 | -0.000033 |
| H | 2.580941  | -3.009896 | 0.000258  |
| H | -4.726340 | 0.246455  | -0.000142 |
| H | 4.255595  | -1.138260 | 0.000288  |
| H | -3.231004 | 2.236449  | -0.000200 |
| H | 3.424753  | 1.194742  | 0.000098  |
| H | -0.931514 | 3.150467  | -0.000182 |
| C | 1.762012  | 3.132620  | -0.000032 |
| H | 2.408267  | 3.118428  | 0.880175  |
| H | 2.408492  | 3.118334  | -0.880066 |
| H | 1.203174  | 4.066705  | -0.000147 |

**Table S17.** Computed total energies, number of imaginary frequencies and Cartesian coordinates of 6MPO at B3P86 *def2*-TZVP level of theory.

|                                                  |                |
|--------------------------------------------------|----------------|
| Electronic Energy (Eh)                           | -686.573803809 |
| Sum of electronic and zero-point Energies (Eh)   | -686.357461    |
| Sum of electronic and thermal Energies (Eh)      | -686.345606    |
| Sum of electronic and enthalpy Energies (Eh)     | -686.344662    |
| Sum of electronic and thermal Free Energies (Eh) | -686.396141    |
| Number of Imaginary Frequencies                  | 0              |
| Mean of alpha and beta Electrons                 | 55             |

### Molecular Geometry in Cartesian Coordinates

|   |           |           |           |
|---|-----------|-----------|-----------|
| C | 3.098035  | -1.484542 | 0.000068  |
| C | 2.871069  | -0.133631 | 0.000055  |
| C | 1.555007  | 0.361643  | -0.000004 |
| C | 0.525196  | -0.591618 | -0.000044 |
| C | 2.007059  | -2.353630 | 0.000038  |
| C | 1.253398  | 1.772870  | 0.000000  |
| C | -0.839436 | -0.144016 | -0.000064 |
| C | -1.122981 | 1.226743  | 0.000001  |
| C | -0.042269 | 2.160516  | 0.000019  |
| C | -2.460495 | 1.648814  | 0.000052  |
| C | -3.470034 | 0.722676  | 0.000039  |
| C | -3.156429 | -0.624863 | -0.000044 |
| N | 0.765910  | -1.919186 | -0.000005 |
| N | -1.890384 | -1.017208 | -0.000099 |
| O | -1.689240 | -2.354337 | -0.000186 |
| H | -0.661319 | -2.462714 | -0.000365 |
| H | -0.296931 | 3.212918  | 0.000053  |
| H | 2.147572  | -3.426966 | 0.000053  |
| H | -3.889687 | -1.417302 | -0.000067 |
| H | 4.101814  | -1.884965 | 0.000108  |
| H | -4.510597 | 1.010457  | 0.000082  |
| H | 3.705024  | 0.554824  | 0.000098  |
| H | -2.678856 | 2.708532  | 0.000099  |
| C | 2.365372  | 2.773628  | 0.000146  |
| H | 3.000303  | 2.650504  | 0.880021  |
| H | 3.000641  | 2.650435  | -0.879471 |
| H | 1.966320  | 3.786188  | 0.000028  |

**Table S18.** Computed total energies, number of imaginary frequencies and Cartesian coordinates of 5CPO at B3P86 *def2*-TZVP level of theory.

|                                                  |               |
|--------------------------------------------------|---------------|
| Electronic Energy (Eh)                           | -1106.8566487 |
| Sum of electronic and zero-point Energies (Eh)   | -1106.67764   |
| Sum of electronic and thermal Energies (Eh)      | -1106.666371  |
| Sum of electronic and enthalpy Energies (Eh)     | -1106.665427  |
| Sum of electronic and thermal Free Energies (Eh) | -1106.715422  |
| Number of Imaginary Frequencies                  | 0             |
| Mean of alpha and beta Electrons                 | 59            |

#### Molecular Geometry in Cartesian Coordinates

|    |           |           |           |
|----|-----------|-----------|-----------|
| C  | 3.572871  | -1.234061 | 0.000073  |
| C  | 2.421832  | -1.974736 | 0.000015  |
| C  | 1.177807  | -1.322208 | -0.000032 |
| C  | 1.182697  | 0.076513  | -0.000029 |
| C  | 3.480199  | 0.160041  | 0.000076  |
| C  | -0.054635 | -2.038803 | -0.000047 |
| C  | -0.076478 | 0.769459  | -0.000043 |
| C  | -1.290725 | 0.062556  | -0.000002 |
| C  | -1.226109 | -1.375936 | -0.000025 |
| C  | -2.495272 | 0.777340  | 0.000071  |
| H  | -3.437357 | 0.248874  | 0.000103  |
| C  | -2.481052 | 2.147449  | 0.000110  |
| C  | -1.272760 | 2.815282  | 0.000050  |
| H  | -0.026315 | -3.120151 | -0.000062 |
| H  | 4.544987  | -1.705579 | 0.000113  |
| H  | 2.452700  | -3.056841 | 0.000010  |
| H  | 4.369848  | 0.776709  | 0.000120  |
| H  | -3.393809 | 2.723657  | 0.000181  |
| H  | -1.169066 | 3.890030  | 0.000059  |
| N  | 2.325968  | 0.790430  | 0.000022  |
| N  | -0.134916 | 2.134830  | -0.000041 |
| O  | 0.988914  | 2.883648  | -0.000160 |
| H  | 1.765868  | 2.199339  | -0.000073 |
| Cl | -2.705046 | -2.275260 | -0.000020 |

**Table S19.** Computed total energies, number of imaginary frequencies and Cartesian coordinates of 6CPO at B3P86 *def2*-TZVP level of theory.

|                                                  |                |
|--------------------------------------------------|----------------|
| Electronic Energy (Eh)                           | -1106.85804283 |
| Sum of electronic and zero-point Energies (Eh)   | -1106.678679   |
| Sum of electronic and thermal Energies (Eh)      | -1106.66741    |
| Sum of electronic and enthalpy Energies (Eh)     | -1106.666465   |
| Sum of electronic and thermal Free Energies (Eh) | -1106.716545   |
| Number of Imaginary Frequencies                  | 0              |
| Mean of alpha and beta Electrons                 | 59             |

### Molecular Geometry in Cartesian Coordinates

|    |           |           |           |
|----|-----------|-----------|-----------|
| C  | 2.361634  | 2.422142  | 0.000260  |
| C  | 2.516267  | 1.061851  | 0.000062  |
| C  | 1.384456  | 0.231241  | -0.000044 |
| C  | 0.128546  | 0.859039  | -0.000019 |
| C  | 1.073704  | 2.958583  | 0.000332  |
| C  | 1.437386  | -1.204106 | -0.000074 |
| C  | -1.063167 | 0.055475  | -0.000075 |
| C  | -0.969356 | -1.340397 | 0.000085  |
| C  | 0.319513  | -1.954261 | 0.000046  |
| C  | -2.140013 | -2.111894 | 0.000264  |
| H  | -2.061007 | -3.190682 | 0.000363  |
| C  | -3.361775 | -1.493428 | 0.000341  |
| C  | -3.423383 | -0.111185 | 0.000094  |
| H  | 3.217581  | 3.081690  | 0.000358  |
| H  | 3.505376  | 0.625898  | 0.000002  |
| H  | 0.912555  | 4.028805  | 0.000515  |
| H  | -4.286084 | -2.051107 | 0.000546  |
| H  | -4.343000 | 0.454540  | 0.000026  |
| N  | -0.000567 | 2.200219  | 0.000172  |
| N  | -2.311338 | 0.610556  | -0.000173 |
| O  | -2.483610 | 1.950498  | -0.000765 |
| H  | -1.527328 | 2.337382  | -0.000027 |
| H  | 0.369449  | -3.034275 | 0.000109  |
| Cl | 2.981283  | -1.986472 | -0.000200 |

**Table S20.** Computed total energies, number of imaginary frequencies and Cartesian coordinates of 5NPO at B3P86 *def2*-TZVP level of theory.

|                                                  |                |
|--------------------------------------------------|----------------|
| Electronic Energy (Eh)                           | -851.759349198 |
| Sum of electronic and zero-point Energies (Eh)   | -851.567991    |
| Sum of electronic and thermal Energies (Eh)      | -851.556301    |
| Sum of electronic and enthalpy Energies (Eh)     | -851.555356    |
| Sum of electronic and thermal Free Energies (Eh) | -851.606237    |
| Number of Imaginary Frequencies                  | 1              |
| Mean of alpha and beta Electrons                 | 62             |

### Molecular Geometry in Cartesian Coordinates

|   |           |           |           |
|---|-----------|-----------|-----------|
| C | 3.267683  | -2.065786 | 0.000047  |
| C | 1.957533  | -2.462667 | -0.000019 |
| C | 0.945577  | -1.489681 | -0.000029 |
| C | 1.321050  | -0.145495 | 0.000003  |
| C | 3.553639  | -0.699745 | 0.000118  |
| C | -0.429057 | -1.836566 | -0.000058 |
| C | 0.291963  | 0.864525  | -0.000010 |
| C | -1.077955 | 0.526239  | 0.000008  |
| C | -1.387777 | -0.888438 | -0.000033 |
| C | -2.016817 | 1.572394  | 0.000081  |
| H | -3.068872 | 1.356174  | 0.000109  |
| C | -1.603228 | 2.878177  | 0.000121  |
| C | -0.257440 | 3.172487  | 0.000067  |
| H | -0.697260 | -2.882570 | -0.000086 |
| H | 4.075747  | -2.782796 | 0.000064  |
| H | 1.686062  | -3.510294 | -0.000053 |
| H | 4.576171  | -0.344976 | 0.000190  |
| H | -2.314761 | 3.690001  | 0.000176  |
| H | 0.152017  | 4.171347  | 0.000063  |
| N | 2.614390  | 0.224663  | 0.000097  |
| N | 0.631691  | 2.190332  | -0.000009 |
| O | 1.921045  | 2.589854  | -0.000143 |
| H | 2.476188  | 1.712826  | -0.000399 |
| N | -2.770073 | -1.400667 | -0.000059 |
| O | -2.924894 | -2.604467 | 0.000105  |
| O | -3.697197 | -0.618221 | -0.000218 |

**Table S21.** Computed total energies, number of imaginary frequencies and Cartesian coordinates of 6CPO at B3P86 *def2*-TZVP level of theory.

|                                                  |                |
|--------------------------------------------------|----------------|
| Electronic Energy (Eh)                           | -851.762941246 |
| Sum of electronic and zero-point Energies (Eh)   | -851.571386    |
| Sum of electronic and thermal Energies (Eh)      | -851.558851    |
| Sum of electronic and enthalpy Energies (Eh)     | -851.557907    |
| Sum of electronic and thermal Free Energies (Eh) | -851.610741    |
| Number of Imaginary Frequencies                  | 0              |
| Mean of alpha and beta Electrons                 | 62             |

### Molecular Geometry in Cartesian Coordinates

|   |           |           |           |
|---|-----------|-----------|-----------|
| C | 1.748773  | 2.878346  | 0.120291  |
| C | 2.138497  | 1.566548  | 0.092942  |
| C | 1.165585  | 0.553778  | 0.023816  |
| C | -0.179609 | 0.957564  | 0.014738  |
| C | 0.389490  | 3.186954  | 0.080408  |
| C | 1.430207  | -0.855770 | 0.015679  |
| C | -1.223883 | -0.033124 | -0.006488 |
| C | -0.910726 | -1.396109 | 0.004117  |
| C | 0.460572  | -1.785794 | 0.024827  |
| C | -1.934938 | -2.351141 | -0.014916 |
| H | -1.679659 | -3.402141 | -0.009354 |
| C | -3.241703 | -1.939949 | -0.039663 |
| C | -3.524063 | -0.586432 | -0.046769 |
| H | 2.478819  | 3.672937  | 0.173818  |
| H | 3.188220  | 1.317904  | 0.128092  |
| H | 0.046173  | 4.213205  | 0.092456  |
| H | -4.062507 | -2.640956 | -0.053798 |
| H | -4.523345 | -0.177633 | -0.066956 |
| N | -0.536998 | 2.255769  | 0.035995  |
| N | -2.545243 | 0.310751  | -0.030809 |
| O | -2.937187 | 1.602693  | -0.045179 |
| H | -2.056984 | 2.141688  | -0.007172 |
| H | 0.698362  | -2.840548 | 0.021536  |
| N | 2.809989  | -1.350519 | -0.044208 |
| O | 3.093252  | -2.316985 | 0.629924  |
| O | 3.582368  | -0.781419 | -0.787165 |

**Table S22.** Calculated and experimental transitions for some N-oxides.

|       | $\lambda_{calc}$ | Transition<br>(weight%)           | Main character                                  | $\lambda_{exp}$ | APD |
|-------|------------------|-----------------------------------|-------------------------------------------------|-----------------|-----|
| phenO | 334              | HOMO $\rightarrow$<br>LUMO (66.3) | C( $p_z$ ) (83%) $\rightarrow$ C( $p_z$ ) (76%) | 318             | 4.9 |
|       | 269              | H-1 $\rightarrow$ LUMO<br>(45.2)  | C( $p_z$ ) (90%) $\rightarrow$ C( $p_z$ ) (76%) | 268             | 0.2 |
|       | 265              | H-2 $\rightarrow$ L+1 (53.1)      | N( $p_z$ ) (48%) $\rightarrow$ C( $p_z$ ) (90%) |                 |     |
|       | 245              | H-4 $\rightarrow$ LUMO<br>(56.9)  | C( $p_z$ ) (92%) $\rightarrow$ C( $p_z$ ) (76%) | 240             | 2.0 |
| TMPO  | 335              | HOMO $\rightarrow$<br>LUMO (56.7) | C( $p_z$ ) (75%) $\rightarrow$ C( $p_z$ ) (76%) | 333             | 0.5 |
|       | 288              | H-1 $\rightarrow$ LUMO<br>(47.5)  | C( $p_z$ ) (78%) $\rightarrow$ C( $p_z$ ) (76%) | 283             | 1.7 |
|       | 278              | H-1 $\rightarrow$ L+1 (63.1)      | C( $p_z$ ) (78%) $\rightarrow$ C( $p_z$ ) (81%) |                 |     |
|       | 258              | H-3 $\rightarrow$ LUMO<br>(58.2)  | C( $p_z$ ) (63%) $\rightarrow$ C( $p_z$ ) (76%) | 244             | 5.5 |
| DMPO  | 344              | HOMO $\rightarrow$<br>LUMO (66.5) | C( $p_z$ ) (78%) $\rightarrow$ C( $p_z$ ) (74%) | 315             | 9.1 |
|       | 277              | H-1 $\rightarrow$ LUMO<br>(52.7)  | C( $p_z$ ) (91%) $\rightarrow$ C( $p_z$ ) (74%) | 271             | 2.2 |
|       | 253              | H-3 $\rightarrow$ LUMO<br>(63.7)  | O( $p_z$ ) (35%) $\rightarrow$ C( $p_z$ ) (74%) | 240             | 5.2 |
| 5CPO  | 353              | HOMO $\rightarrow$<br>LUMO (67.7) | C( $p_z$ ) (77%) $\rightarrow$ C( $p_z$ ) (74%) | 376             | 6.1 |
|       | 321              | HOMO $\rightarrow$ L+1<br>(58.4)  | C( $p_z$ ) (77%) $\rightarrow$ C( $p_z$ ) (88%) | 331             | 3.2 |
|       | 274              | H-1 $\rightarrow$ LUMO<br>(49.6)  | C( $p_z$ ) (88%) $\rightarrow$ C( $p_z$ ) (74%) | 277             | 1.0 |
|       | 269              | H-1 $\rightarrow$ L+1 (50.1)      | C( $p_z$ ) (88%) $\rightarrow$ C( $p_z$ ) (88%) |                 |     |
|       | 252              | H-3 $\rightarrow$ L+1 (53.5)      | C( $p_z$ ) (87%) $\rightarrow$ C( $p_z$ ) (88%) |                 |     |
|       | 251              | H-3 $\rightarrow$ LUMO<br>(56.4)  | C( $p_z$ ) (87%) $\rightarrow$ C( $p_z$ ) (74%) | 244             | 2.8 |
| 6CPO  | 344              | HOMO $\rightarrow$<br>LUMO (64.7) | C( $p_z$ ) (74%) $\rightarrow$ C( $p_z$ ) (76%) | 381             | 9.7 |
|       | 317              | HOMO $\rightarrow$ L+1<br>(56.6)  | C( $p_z$ ) (74%) $\rightarrow$ C( $p_z$ ) (88%) | 317             | 0.1 |
|       | 279              | H-1 $\rightarrow$ L+1 (47.7)      | C( $p_z$ ) (82%) $\rightarrow$ C( $p_z$ ) (88%) | 274             | 1.9 |
|       | 271              | H-1 $\rightarrow$ LUMO<br>(46.6)  | C( $p_z$ ) (82%) $\rightarrow$ C( $p_z$ ) (76%) |                 |     |
|       | 244              | H-3 $\rightarrow$ LUMO<br>(52.9)  | C( $p_z$ ) (54%) $\rightarrow$ C( $p_z$ ) (76%) | 242             | 1.0 |



|      |     |                       |                                                                |     |     |
|------|-----|-----------------------|----------------------------------------------------------------|-----|-----|
| 5MPO | 352 | HOMO →<br>LUMO (68.3) | C( $p_z$ ) (82%) → C( $p_z$ ) (75%)                            | 342 | 2.8 |
|      | 316 | HOMO → L+1<br>(57.4)  | C( $p_z$ ) (82%) → C( $p_z$ ) (89%)                            |     |     |
|      | 272 | H-1 → LUMO<br>(50.8)  | C( $p_z$ ) (90%) → C( $p_z$ ) (75%)                            | 277 | 1.9 |
|      | 248 | H-3 → LUMO<br>(60.2)  | O( $p_z$ ) (37%) → C( $p_z$ ) (75%)                            | 247 | 0.2 |
| 6MPO | 345 | HOMO →<br>LUMO (67.2) | C( $p_z$ ) (82%) → C( $p_z$ ) (75%)                            | 342 | 0.9 |
|      | 315 | HOMO → L+1<br>(56.6)  | C( $p_z$ ) (82%) → C( $p_z$ ) (88%)                            |     |     |
|      | 274 | H-1 → L+1 (42.4)      | C( $p_z$ ) (87%) → C( $p_z$ ) (88%)                            | 281 | 2.5 |
|      | 244 | H-3 → LUMO<br>(52.0)  | O( $p_z$ ) (35%) → C( $p_z$ ) (75%)                            | 248 | 1.7 |
| 5NPO | 355 | HOMO →<br>LUMO (67.5) | C( $p_z$ ) (69%) → C( $p_z$ ) (53%)                            | 345 | 3.0 |
|      | 299 | HOMO → L+1<br>(60.6)  | C( $p_z$ ) (69%) → C( $p_z$ ) (72%)                            | 288 | 3.7 |
|      | 272 | H-4 → LUMO<br>(47.1)  | C( $p_z$ ) (59%) → C( $p_z$ ) (53%)                            |     |     |
|      | 260 | H-1 → L+1 (48.4)      | C( $p_z$ ) (89%) → C( $p_z$ ) (72%)                            | 251 | 3.7 |
| 6NPO | 353 | HOMO →<br>LUMO (66.2) | C( $p_z$ ) (72%) → C( $p_z$ ) (50%) +<br>NO <sub>3</sub> (48%) | 381 | 7.3 |
|      | 311 | HOMO → L+1<br>(50.7)  | C( $p_z$ ) (72%) → C( $p_z$ ) (72%)                            |     |     |
|      | 273 | H-4 → L+1 (47.8)      | NO <sub>3</sub> (38%) → C( $p_z$ ) (72%)                       |     |     |
|      | 266 | H-2 → L+1 (48.7)      | C( $p_z$ ) (85%) → C( $p_z$ ) (72%)                            | 265 | 0.3 |
